# Supplementary material for: A global compilation of U-series-dated fossil coral sea-level indicators for the Last Interglacial period (Marine Isotope Stage 5e)
Source: Copernicus journal article supplement (doi:10.5194/essd-13-3155-2021), 2021-07-02
Supplement: Supplementary file 1 [file essd-13-3155-2021-supplement.zip]

Archive with 2 entries (2 files):
- S1.xlsx
- essd-13-3155-2021-supplement-title-page.pdf
