# Supplementary material for: A global compilation of U-series-dated fossil coral sea-level indicators for the Last Interglacial period (Marine Isotope Stage 5e)
Source: Copernicus journal article supplement (doi:10.5194/essd-13-3155-2021), 2021-07-02
Supplement: Supplementary file 1 [file essd-13-3155-2021-supplement.zip › essd-13-3155-2021-supplement-title-page.pdf]

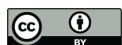

## *Supplement of*

# **A global compilation of U-series-dated fossil coral sea-level indicators for the Last Interglacial period (Marine Isotope Stage 5e)**

**Peter M. Chutcharavan and Andrea Dutton**

*Correspondence to:* Peter M. Chutcharavan ([chutcharavan@wisc.edu](mailto:chutcharavan@wisc.edu))

- [essd-13-3155-2021-supplement-title-page.pdf](#)
- [S1.xlsx](#)

The copyright of individual parts of the supplement might differ from the article licence.
