# Supplementary material for: A global compilation of U-series-dated fossil coral sea-level indicators for the Last Interglacial period (Marine Isotope Stage 5e)
Source: Copernicus journal article supplement (doi:10.5194/essd-13-3155-2021), 2021-07-02
Supplement: Supplementary file 1 [file essd-13-3155-2021-supplement.zip › S1.xlsx]

## Sheet: Version 1.15s notes
Supplementary material for "A Global Compilation of U-series Dated Fossil Coral Sea-level Indicators for the Last Interglacial Period (MIS 5e)"
Peter M. Chutcharavan1,2, Andrea Dutton1
1Department of Geoscience, University of Wisconsin - Madison, Madison, Wisconsin, 53706, USA
2Department of Geological Sciences, University of Florida, Gainesville, Florida, 32611, USA
Correspondence to: Peter M. Chutcharavan (chutcharavan@wisc.edu)
This version also includes the "strict" screening protocol used in the main text. Columns Q-T for "Accepted in other study?" in the U-series tab have been duplicated to include both the strict and flexible screening protocols. This has also been applied to the "RSL from single coral" tab.

## Sheet: README
WALIS spreadsheet
This file was exported from WALIS on 20 04 2021
The data in this file were compiled in WALIS, the World Atlas of Last Interglacial Shorelines. WALIS is a product of the ERC project WARMCOASTS (ERC-StG-802414). Bugs and suggestions for improvements can be sent to arovere@marum.de
The sheets in this file contain the following information (if available): - Summary RSL datapoints: RSL datapoints from stratigraphic records, U-Series from corals and U-Series from speleothems. Rows with common RSL ID (but different ages available) are highlighted with alternating gray and white colors. - RSL from single coral: RSL datapoints from dated corals, for which paleo water depth is est…
Information on each field can be found at: https://walis-help.readthedocs.io/en/latest/ Information on WALIS (Including data download) can be found at: https://warmcoasts.eu/world-atlas.html
Suggested acknowledgments: The data used in this study were [extracted from / compiled in] WALIS, a sea-level database interface developed by the ERC Starting Grant WARMCOASTS (ERC-StG-802414), in collaboration with PALSEA (PAGES / INQUA) working group. The database structure was designed by A. Rovere, D. Ryan, T. Lorscheid, A. Dutton, P. Chutcharavan, D. Brill, N. Jankowski, D. Mueller, M. Bartz…

## Sheet: Summary of RSL datapoints
WALIS_ID	Latitude	Longitude	Site	Subsite	Nation	Region	Type of datapoint	RSL Indicator	RSL indicator description	Elevation measurement technique	Elevation (m)	Elevation error (m)	Paleo water depth estimate (m)	Upper limit of living range (m)	Lower limit of living range (m)	RWL	IR	Vertical datum	Paleo RSL (m)	Paleo RSL uncertainty (m)	Dating technique	Timing constraint	Originally reported ID	Analysis ID	Material_type	Reported age (ka)	Reported age uncertainty (ka)	U-Series recalculated age (ka)	U-Series recalculate age uncertainty (ka)	U-Series corrected age (speleothems, ka)	U-Series corrected age uncertainty (speleothems, ka)	Stratigraphy Upper Age (ka)	Stratigraphy Lower Age (ka)	MIS limit	Marine Isotopic Stage	Quality of RSL information	Quality of age information	Reference(s)	Record Created by	Last Update
USeries_1015	15.171	39.8571	Red Sea coast	Abdur Reef Limestone, Abdur North			Sea Level Indicator	Single Coral	Abdur Reef Limestone; fields of branching Stylophora, Goniopora, and Galazea sp. Indicative of reef flat facies of fringing reef (0.5-3 m water depth) Not Reported	Not reported	10	4.12	-1.75	-0.5	-3			Mean Sea Level / General definition			U-Series	Equal to	AN-7-6a no.2	WA00-005-001	Coral	136.4	0.7	137.02	0.7		0							Walter et al., 2000 Chutcharavan and Dutton, 2020	Peter Chutcharavan	2021-04-20
USeries_1016	15.186	39.8538	Red Sea coast	Abdur Reef Limestone, Abdur North			Sea Level Indicator	Single Coral	Abdur Reef Limestone; fields of branching Stylophora, Goniopora, and Galazea sp. Indicative of reef flat facies of fringing reef (0.5-3 m water depth) Not Reported	Not reported	10	4.12	-1.75	-0.5	-3			Mean Sea Level / General definition			U-Series	Equal to	AN-13-16a no.6	WA00-006-001	Coral	156	0.9	156.87	0.9									Walter et al., 2000 Chutcharavan and Dutton, 2020	Peter Chutcharavan	2021-04-20
USeries_1018	-21.7971	-138.852	Mururoa atoll, Tuamotu archipelago	Northeastern rim of atoll; drill core			Sea Level Indicator	Single Coral	coralgal framework indicative of 0-6 m paleowater depth Goniastrea retiformis	Distance from top of drill core	-18.7	1	-5	0	-5			Mean Sea Level / General definition			U-Series	Equal to	FIL 8/40, 18.7m	CA01-021-001	Coral	126.766	2.585	128.35	2.75									Camoin et al., 2001 Chutcharavan and Dutton, 2020	Peter Chutcharavan	2021-04-20
USeries_1019	-21.7971	-138.852	Mururoa atoll, Tuamotu archipelago	Northeastern rim of atoll; drill core			Sea Level Indicator	Single Coral	coralgal framework indicative of 0-6 m paleowater depth Goniastrea retiformis	Distance from top of drill core	-18.2	1	-5	0	-5			Mean Sea Level / General definition			U-Series	Equal to	FIL 8/40, 18.2m	CA01-022-001	Coral	134.577	5.271	136.438	5.44381									Camoin et al., 2001 Chutcharavan and Dutton, 2020	Peter Chutcharavan	2021-04-20
USeries_1020	-21.8093	-138.82	Mururoa atoll, Tuamotu archipelago	Northeastern rim of atoll; drill core			Sea Level Indicator	Single Coral	Not Reported Platygyra daedalea	Distance from top of drill core	-21.8	1	-15	0	-15			Mean Sea Level / General definition			U-Series	Equal to	FIL 5/30, 21.8m	CA01-025-001	Coral	126.21	2.553	127.837	2.64464									Camoin et al., 2001 Chutcharavan and Dutton, 2020	Peter Chutcharavan	2021-04-20
USeries_1021	-21.7971	-138.852	Mururoa atoll, Tuamotu archipelago	Northeastern rim of atoll; drill core			Sea Level Indicator	Single Coral	Not Reported Porities sp.	Distance from top of drill core	-10.1	1	-20	0	-20			Mean Sea Level / General definition			U-Series	Equal to	FIL 8/40, 10.1m	CA01-029-001	Coral	123.546	1.496	124.97	1.6									Camoin et al., 2001 Chutcharavan and Dutton, 2020	Peter Chutcharavan	2021-04-20
USeries_1022	-21.7971	-138.852	Mururoa atoll, Tuamotu archipelago	Northeastern rim of atoll; drill core			Sea Level Indicator	Single Coral	Not Reported Porities sp.	Distance from top of drill core	-14.45	1	-20	0	-20			Mean Sea Level / General definition			U-Series	Equal to	FIL 8/30, 14.45m	CA01-030-001	Coral	152.943	7.5	155.287	16.221									Camoin et al., 2001 Chutcharavan and Dutton, 2020	Peter Chutcharavan	2021-04-20
USeries_1023	-17.5347	-149.599	Tahiti	Faaa; drill core			Sea Level Indicator	Single Coral	coral framework (according to IODP 310 Visual Core Description); growth position (determined by orientation of coral) massive Favia spp.	Distance from top of drill core	-117.61	1	-6	0	-6			Mean Sea Level / General definition			U-Series	Equal to	310-M0019A-29R-1W-0,4	TH09-001-001	Coral	136.629	0.94037	136.9	0.94									Thomas et al., 2009 Chutcharavan and Dutton, 2020	Peter Chutcharavan	2021-04-20
USeries_1024	-17.5347	-149.599	Tahiti	Faaa; drill core			Sea Level Indicator	Single Coral	coral framework (according to IODP 310 Visual Core Description); growth position (determined by orientation of coral) massive Favia spp.	Distance from top of drill core	-117.61	1	-6	0	-6			Mean Sea Level / General definition			U-Series	Equal to	310-M0019A-29R-1W-0,4	TH09-001-002	Coral	137.8	0.386478	138.14	0.39									Thomas et al., 2009 Chutcharavan and Dutton, 2020	Peter Chutcharavan	2021-04-20
USeries_1025	-17.5347	-149.599	Tahiti	Faaa; drill core			Sea Level Indicator	Single Coral	coral framework; growth position (determined by orientation of coral, orientation of partially filled geopetals within the coral, position of algal crust on upper surface of coral and coral forms part of a continuous framework) massive Porites	Distance from top of drill core	-115.24	1	-25	0	-25			Mean Sea Level / General definition			U-Series	Equal to	310-M0019A-27R-1W-62,83	TH09-003-001	Coral	133.1	0.37075	133.46	0.37									Thomas et al., 2009 Chutcharavan and Dutton, 2020	Peter Chutcharavan	2021-04-20
USeries_1026	-17.5347	-149.599	Tahiti	Faaa; drill core			Sea Level Indicator	Single Coral	coral framework; growth position (determined by orientation of coral, orientation of partially filled geopetals within the coral, position of algal crust on upper surface of coral and coral forms part of a continuous framework) massive Porites	Distance from top of drill core	-115.24	1	-25	0	-25			Mean Sea Level / General definition			U-Series	Equal to	310-M0019A-27R-1W-62,83	TH09-003-002	Coral	133.23	0.899365	133.49	0.9									Thomas et al., 2009 Chutcharavan and Dutton, 2020	Peter Chutcharavan	2021-04-20
USeries_1027	-17.5347	-149.599	Tahiti	Faaa; drill core			Sea Level Indicator	Single Coral	coral framework; growth position (determined by orientation of coral, orientation of partially filled geopetals within the coral, position of algal crust on upper surface of coral and coral forms part of a continuous framework) massive Porites	Distance from top of drill core	-115.24	1	-25	0	-25			Mean Sea Level / General definition			U-Series	Equal to	310-M0019A-27R-1W-62,83	TH09-003-003	Coral	134	0.366884	134.34	0.37									Thomas et al., 2009 Chutcharavan and Dutton, 2020	Peter Chutcharavan	2021-04-20
USeries_1028	-17.5347	-149.599	Tahiti	Faaa; drill core			Sea Level Indicator	Single Coral	coral framework (according to IODP 310 Visual Core Description); growth position (uncertain) (determined by orientation of coral and form continuous framework) robust branching Pocillopora sp.	Distance from top of drill core	-119.61	1	-6	0	-6			Mean Sea Level / General definition			U-Series	Equal to	310-M0019A-32R-1W-0,4	TH09-005-001	Coral	134.939	0.927354	135.2	0.93									Thomas et al., 2009 Chutcharavan and Dutton, 2020	Peter Chutcharavan	2021-04-20
USeries_1029	-17.5347	-149.599	Tahiti	Faaa; drill core			Sea Level Indicator	Single Coral	coral framework (according to IODP 310 Visual Core Description); growth position (uncertain) (determined by orientation of coral and form continuous framework) robust branching Pocillopora sp.	Distance from top of drill core	-119.61	1	-6	0	-6			Mean Sea Level / General definition			U-Series	Equal to	310-M0019A-32R-1W-0,4	TH09-005-002	Coral	137.016	0.382438	137.29	0.38									Thomas et al., 2009 Chutcharavan and Dutton, 2020	Peter Chutcharavan	2021-04-20
USeries_1030	-17.5347	-149.599	Tahiti	Faaa; drill core			Sea Level Indicator	Single Coral	coral framework of tabular Acropora, with massive Faviidae, Pocillopora and encrusting Porites; growth position (determined by orientation of coral and algal crust on upper surface of coral) branching Acropora sp.	Distance from top of drill core	-117.77	1	-6	0	-6			Mean Sea Level / General definition			U-Series	Equal to	310-M0019A-29R-1W-16,24	TH09-006-001	Coral	135.038	0.91684	135.3	0.92									Thomas et al., 2009 Chutcharavan and Dutton, 2020	Peter Chutcharavan	2021-04-20
USeries_1031	-17.5347	-149.599	Tahiti	Faaa; drill core			Sea Level Indicator	Single Coral	coral framework of tabular Acropora, with massive Faviidae, Pocillopora and encrusting Porites; growth position (determined by orientation of coral and algal crust on upper surface of coral) branching Acropora sp.	Distance from top of drill core	-117.77	1	-6	0	-6			Mean Sea Level / General definition			U-Series	Equal to	310-M0019A-29R-1W-16,24	TH09-006-002	Coral	135.9	0.372851	136.22	0.37									Thomas et al., 2009 Chutcharavan and Dutton, 2020	Peter Chutcharavan	2021-04-20
USeries_1032	-17.7665	-149.551	Tahiti	Maraa; drill core			Sea Level Indicator	Single Coral	coral framework (according to IODP 310 Visual Core Description); growth position (determined by orientation of coral and orientation of partially filled geopetals within the coral) massive Porites	Distance from top of drill core	-117.52	1	-25	0	-25			Mean Sea Level / General definition			U-Series	Equal to	310-M0005D-20R-2W-0,21	TH09-007-001	Coral	132.377	0.91926	132.63	0.92									Thomas et al., 2009 Chutcharavan and Dutton, 2020	Peter Chutcharavan	2021-04-20
USeries_1033	-17.7665	-149.551	Tahiti	Maraa; drill core			Sea Level Indicator	Single Coral	coral framework (according to IODP 310 Visual Core Description); growth position (determined by orientation of coral and orientation of partially filled geopetals within the coral) massive Porites	Distance from top of drill core	-117.52	1	-25	0	-25			Mean Sea Level / General definition			U-Series	Equal to	310-M0005D-20R-2W-0,21	TH09-007-002	Coral	137.912	0.385883	138.19	0.39									Thomas et al., 2009 Chutcharavan and Dutton, 2020	Peter Chutcharavan	2021-04-20
USeries_1034	-17.7665	-149.551	Tahiti	Maraa; drill core			Sea Level Indicator	Single Coral	coral framework (according to IODP 310 Visual Core Description); growth position (determined by orientation of coral and orientation of partially filled geopetals within the coral) massive Porites	Distance from top of drill core	-117.66	1	-25	0	-25			Mean Sea Level / General definition			U-Series	Equal to	310-M0005D-20R-2W-14,21	TH09-008-001	Coral	133.567	0.957761	133.82	0.96									Thomas et al., 2009 Chutcharavan and Dutton, 2020	Peter Chutcharavan	2021-04-20
USeries_1035	-17.7665	-149.551	Tahiti	Maraa; drill core			Sea Level Indicator	Single Coral	coral framework (according to IODP 310 Visual Core Description); growth position (determined by orientation of coral and orientation of partially filled geopetals within the coral) massive Porites	Distance from top of drill core	-117.66	1	-25	0	-25			Mean Sea Level / General definition			U-Series	Equal to	310-M0005D-20R-2W-14,21	TH09-008-002	Coral	133.7	0.372582	134.02	0.37									Thomas et al., 2009 Chutcharavan and Dutton, 2020	Peter Chutcharavan	2021-04-20
USeries_1036	-15.3791	145.786	Northern GBR	Ribbon Reef			Sea Level Indicator	Single Coral	cAB Acropora	Distance from top of drill core	-16.1	1	-3	0	-3			Mean Sea Level / General definition			U-Series	Equal to	Ribbon Reef 5	BR04-001-001	Coral	125.7	0.6											Braithwaite et al., 2004 Chutcharavan and Dutton, 2020	Peter Chutcharavan	2021-04-20
USeries_1040	-23.8583	152.375	Southern GBR	Fairfax Reef			Sea Level Indicator	Single Coral	cAA and aA1 assemblages dominate; Holocene/Pleistocene boundary is at 7.6 m, with a second thin soil horizon at 8.7-8.8 m. The authors interpret this second soil horizion as either part of the Holocene/Pleistocene boundary or, alternatively, a small (<2-3 m) sea-level oscillation. The second soil horizon is not observed in any of the other GBR cores taken for this study. Isopora	Distance from top of drill core	-12.07	1	-6	0	-6			Mean Sea Level / General definition			U-Series	Equal to	FFX3-10D_1	DE17-001-001	Coral	130.8	0.81	130.8	0.81									Dechnik et al., 2017 Chutcharavan and Dutton, 2020	Peter Chutcharavan	2021-04-20
USeries_1041	-23.8583	152.375	Southern GBR	Fairfax Reef			Sea Level Indicator	Single Coral	cAA and aA1 assemblages dominate; Holocene/Pleistocene boundary is at 7.6 m, with a second thin soil horizon at 8.7-8.8 m. The authors interpret this second soil horizion as either part of the Holocene/Pleistocene boundary or, alternatively, a small (<2-3 m) sea-level oscillation. The second soil horizon is not observed in any of the other GBR cores taken for this study. Isopora	Distance from top of drill core	-12.07	1	-6	0	-6			Mean Sea Level / General definition			U-Series	Equal to	FFX3-10D_2	DE17-001-002	Coral	129.12	0.83	129.13	0.84									Dechnik et al., 2017 Chutcharavan and Dutton, 2020	Peter Chutcharavan	2021-04-20
USeries_1042	-23.8583	152.375	Southern GBR	Fairfax Reef			Sea Level Indicator	Single Coral	cAA and aA1 assemblages dominate; Holocene/Pleistocene boundary is at 7.6 m, with a second thin soil horizon at 8.7-8.8 m. The authors interpret this second soil horizion as either part of the Holocene/Pleistocene boundary or, alternatively, a small (<2-3 m) sea-level oscillation. The second soil horizon is not observed in any of the other GBR cores taken for this study. Isopora	Distance from top of drill core	-12.07	1	-6	0	-6			Mean Sea Level / General definition			U-Series	Equal to	FFX3-10D_3	DE17-001-003	Coral	127.16	0.62	127.14	0.64									Dechnik et al., 2017 Chutcharavan and Dutton, 2020	Peter Chutcharavan	2021-04-20
USeries_1043	-23.8583	152.375	Southern GBR	Fairfax Reef			Sea Level Indicator	Single Coral	cAA and aA1 assemblages dominate; Halimeda fragments present; Holocene/Pleistocene boundary is at 7.6 m, with a second thin soil horizon at 8.7-8.8 m. The authors interpret this second soil horizion as either part of the Holocene/Pleistocene boundary or, alternatively, a small (<2-3 m) sea-level oscillation. The second soil horizon is not observed in any of the other GBR cores taken for this stud…	Distance from top of drill core	-8.05	1	-6	0	-6			Mean Sea Level / General definition			U-Series	Equal to	FFX3-7C_1	DE17-002-001	Coral	128.59	0.83	128.61	0.84									Dechnik et al., 2017 Chutcharavan and Dutton, 2020	Peter Chutcharavan	2021-04-20
USeries_1044	-23.8583	152.375	Southern GBR	Fairfax Reef			Sea Level Indicator	Single Coral	cAA and aA1 assemblages dominate; Halimeda fragments present; Holocene/Pleistocene boundary is at 7.6 m, with a second thin soil horizon at 8.7-8.8 m. The authors interpret this second soil horizion as either part of the Holocene/Pleistocene boundary or, alternatively, a small (<2-3 m) sea-level oscillation. The second soil horizon is not observed in any of the other GBR cores taken for this stud…	Distance from top of drill core	-8.05	1	-6	0	-6			Mean Sea Level / General definition			U-Series	Equal to	FFX3-7C_2	DE17-002-002	Coral	128.51	0.73	128.49	0.73									Dechnik et al., 2017 Chutcharavan and Dutton, 2020	Peter Chutcharavan	2021-04-20
USeries_1045	-23.8583	152.375	Southern GBR	Fairfax Reef			Sea Level Indicator	Single Coral	cAA and aA1 assemblages dominate; Halimeda fragments present; Holocene/Pleistocene boundary is at 7.6 m, with a second thin soil horizon at 8.7-8.8 m. The authors interpret this second soil horizion as either part of the Holocene/Pleistocene boundary or, alternatively, a small (<2-3 m) sea-level oscillation. The second soil horizon is not observed in any of the other GBR cores taken for this stud…	Distance from top of drill core	-8.05	1	-6	0	-6			Mean Sea Level / General definition			U-Series	Equal to	FFX3-7C_3	DE17-002-003	Coral	129.28	0.51	129.29	0.51									Dechnik et al., 2017 Chutcharavan and Dutton, 2020	Peter Chutcharavan	2021-04-20
USeries_1046	-23.8583	152.375	Southern GBR	Fairfax Reef			Sea Level Indicator	Single Coral	cAA and aA1 assemblages dominate; Halimeda fragments present; Holocene/Pleistocene boundary is at 7.6 m, with a second thin soil horizon at 8.7-8.8 m. The authors interpret this second soil horizion as either part of the Holocene/Pleistocene boundary or, alternatively, a small (<2-3 m) sea-level oscillation. The second soil horizon is not observed in any of the other GBR cores taken for this stud…	Distance from top of drill core	-8.3	1	-6	0	-6			Mean Sea Level / General definition			U-Series	Equal to	FFX3-7D_1	DE17-003-001	Coral	128.81	0.68	128.82	0.69									Dechnik et al., 2017 Chutcharavan and Dutton, 2020	Peter Chutcharavan	2021-04-20
USeries_1047	-23.8583	152.375	Southern GBR	Fairfax Reef			Sea Level Indicator	Single Coral	cAA and aA1 assemblages dominate; Halimeda fragments present; Holocene/Pleistocene boundary is at 7.6 m, with a second thin soil horizon at 8.7-8.8 m. The authors interpret this second soil horizion as either part of the Holocene/Pleistocene boundary or, alternatively, a small (<2-3 m) sea-level oscillation. The second soil horizon is not observed in any of the other GBR cores taken for this stud…	Distance from top of drill core	-8.3	1	-6	0	-6			Mean Sea Level / General definition			U-Series	Equal to	FFX3-7D_2	DE17-003-002	Coral	128.56	0.68	128.56	0.68									Dechnik et al., 2017 Chutcharavan and Dutton, 2020	Peter Chutcharavan	2021-04-20
USeries_1048	-23.8583	152.375	Southern GBR	Fairfax Reef			Sea Level Indicator	Single Coral	cAA and aA1 assemblages dominate; Halimeda fragments present; Holocene/Pleistocene boundary is at 7.6 m, with a second thin soil horizon at 8.7-8.8 m. The authors interpret this second soil horizion as either part of the Holocene/Pleistocene boundary or, alternatively, a small (<2-3 m) sea-level oscillation. The second soil horizon is not observed in any of the other GBR cores taken for this stud…	Distance from top of drill core	-8.3	1	-6	0	-6			Mean Sea Level / General definition			U-Series	Equal to	FFX3-7D_3	DE17-003-003	Coral	126.05	0.5	126.06	0.5									Dechnik et al., 2017 Chutcharavan and Dutton, 2020	Peter Chutcharavan	2021-04-20
USeries_1049	-23.8583	152.375	Southern GBR	Fairfax Reef			Sea Level Indicator	Single Coral	cAA and aA1 assemblages dominate; Holocene/Pleistocene boundary is at 7.6 m, with a second thin soil horizon at 8.7-8.8 m. The authors interpret this second soil horizion as either part of the Holocene/Pleistocene boundary or, alternatively, a small (<2-3 m) sea-level oscillation. The second soil horizon is not observed in any of the other GBR cores taken for this study. Leptoria	Distance from top of drill core	-11.2	1	-6	0	-6			Mean Sea Level / General definition			U-Series	Equal to	FFX3-9E_1	DE17-004-001	Coral	127.41	0.8	127.43	0.8									Dechnik et al., 2017 Chutcharavan and Dutton, 2020	Peter Chutcharavan	2021-04-20
USeries_1050	-23.8583	152.375	Southern GBR	Fairfax Reef			Sea Level Indicator	Single Coral	cAA and aA1 assemblages dominate; Holocene/Pleistocene boundary is at 7.6 m, with a second thin soil horizon at 8.7-8.8 m. The authors interpret this second soil horizion as either part of the Holocene/Pleistocene boundary or, alternatively, a small (<2-3 m) sea-level oscillation. The second soil horizon is not observed in any of the other GBR cores taken for this study. Leptoria	Distance from top of drill core	-11.2	1	-6	0	-6			Mean Sea Level / General definition			U-Series	Equal to	FFX3-9E_2	DE17-004-002	Coral	129.66	0.51	129.66	0.49									Dechnik et al., 2017 Chutcharavan and Dutton, 2020	Peter Chutcharavan	2021-04-20
USeries_1051	-23.8583	152.375	Southern GBR	Fairfax Reef			Sea Level Indicator	Single Coral	cAA and aA1 assemblages dominate; Holocene/Pleistocene boundary is at 7.6 m, with a second thin soil horizon at 8.7-8.8 m. The authors interpret this second soil horizion as either part of the Holocene/Pleistocene boundary or, alternatively, a small (<2-3 m) sea-level oscillation. The second soil horizon is not observed in any of the other GBR cores taken for this study. Leptoria	Distance from top of drill core	-11.2	1	-6	0	-6			Mean Sea Level / General definition			U-Series	Equal to	FFX3-9E_3	DE17-004-003	Coral	126.16	0.45	126.14	0.44									Dechnik et al., 2017 Chutcharavan and Dutton, 2020	Peter Chutcharavan	2021-04-20
USeries_1052	-23.6199	152.155	Southern GBR	Fitzroy Reef			Sea Level Indicator	Single Coral	cAB; cAA, aA1 and vermetid gastropods are also common throughout the core; solution unconformity present at the Holocene-Pleistocene boundary (7.4 m), indicating subaerial exposure (Dechnik et al. 2015). Acropora	Distance from top of drill core	-9.07	1	-3	0	-3			Mean Sea Level / General definition			U-Series	Equal to	FIT2-10F_1	DE17-005-001	Coral	145	0.71	145.09	1									Dechnik et al., 2017 Chutcharavan and Dutton, 2020	Peter Chutcharavan	2021-04-20
USeries_1053	-23.6199	152.155	Southern GBR	Fitzroy Reef			Sea Level Indicator	Single Coral	cAB; cAA, aA1 and vermetid gastropods are also common throughout the core; solution unconformity present at the Holocene-Pleistocene boundary (7.4 m), indicating subaerial exposure (Dechnik et al. 2015). Acropora	Distance from top of drill core	-9.07	1	-3	0	-3			Mean Sea Level / General definition			U-Series	Equal to	FIT2-10F_2	DE17-005-002	Coral	150.97	1.2	150.98	0.88									Dechnik et al., 2017 Chutcharavan and Dutton, 2020	Peter Chutcharavan	2021-04-20
USeries_1054	-23.6199	152.155	Southern GBR	Fitzroy Reef			Sea Level Indicator	Single Coral	cAB; cAA, aA1 and vermetid gastropods are also common throughout the core; solution unconformity present at the Holocene-Pleistocene boundary (7.4 m), indicating subaerial exposure (Dechnik et al. 2015). Acropora	Distance from top of drill core	-9.07	1	-3	0	-3			Mean Sea Level / General definition			U-Series	Equal to	FIT2-10F_3	DE17-005-003	Coral	147.25	1.7	147.23	0.71									Dechnik et al., 2017 Chutcharavan and Dutton, 2020	Peter Chutcharavan	2021-04-20
USeries_1055	-23.6199	152.155	Southern GBR	Fitzroy Reef			Sea Level Indicator	Single Coral	cAA.; cAB, aA1 and vermetid gastropods are also common throughout the core; solution unconformity present at the Holocene-Pleistocene boundary (7.4 m), indicating subaerial exposure (Dechnik et al. 2015). Acropora	Distance from top of drill core	-11.68	1	-6	0	-6			Mean Sea Level / General definition			U-Series	Equal to	FIT2-12G_1	DE17-006-001	Coral	185.3	0.71	185.32	1.18									Dechnik et al., 2017 Chutcharavan and Dutton, 2020	Peter Chutcharavan	2021-04-20
USeries_1056	-23.6199	152.155	Southern GBR	Fitzroy Reef			Sea Level Indicator	Single Coral	cAA.; cAB, aA1 and vermetid gastropods are also common throughout the core; solution unconformity present at the Holocene-Pleistocene boundary (7.4 m), indicating subaerial exposure (Dechnik et al. 2015). Acropora	Distance from top of drill core	-11.68	1	-6	0	-6			Mean Sea Level / General definition			U-Series	Equal to	FIT2-12G_2	DE17-006-002	Coral	216.2	1	216.21	1.68									Dechnik et al., 2017 Chutcharavan and Dutton, 2020	Peter Chutcharavan	2021-04-20
USeries_1057	-23.6199	152.155	Southern GBR	Fitzroy Reef			Sea Level Indicator	Single Coral	cAA.; cAB, aA1 and vermetid gastropods are also common throughout the core; solution unconformity present at the Holocene-Pleistocene boundary (7.4 m), indicating subaerial exposure (Dechnik et al. 2015). Acropora	Distance from top of drill core	-11.68	1	-6	0	-6			Mean Sea Level / General definition			U-Series	Equal to	FIT2-12G_3	DE17-006-003	Coral	164.97	0.87	164.95	0.71									Dechnik et al., 2017 Chutcharavan and Dutton, 2020	Peter Chutcharavan	2021-04-20
USeries_1058	-23.6199	152.155	Southern GBR	Fitzroy Reef			Sea Level Indicator	Single Coral	cAB; cAA, aA1 and vermetid gastropods are also common throughout the core; solution unconformity present at the Holocene-Pleistocene boundary (7.4 m), indicating subaerial exposure (Dechnik et al. 2015). Isopora	Distance from top of drill core	-8.25	1	-3	0	-3			Mean Sea Level / General definition			U-Series	Equal to	FIT2-9H_1	DE17-007-001	Coral	130	0.68	130.15	1.02									Dechnik et al., 2017 Chutcharavan and Dutton, 2020	Peter Chutcharavan	2021-04-20
USeries_1059	-23.6199	152.155	Southern GBR	Fitzroy Reef			Sea Level Indicator	Single Coral	cAB; cAA, aA1 and vermetid gastropods are also common throughout the core; solution unconformity present at the Holocene-Pleistocene boundary (7.4 m), indicating subaerial exposure (Dechnik et al. 2015). Isopora	Distance from top of drill core	-8.25	1	-3	0	-3			Mean Sea Level / General definition			U-Series	Equal to	FIT2-9H_2	DE17-007-002	Coral	136.59	0.67	136.58	0.88									Dechnik et al., 2017 Chutcharavan and Dutton, 2020	Peter Chutcharavan	2021-04-20
USeries_1060	-23.6199	152.155	Southern GBR	Fitzroy Reef			Sea Level Indicator	Single Coral	cAB; cAA, aA1 and vermetid gastropods are also common throughout the core; solution unconformity present at the Holocene-Pleistocene boundary (7.4 m), indicating subaerial exposure (Dechnik et al. 2015). Isopora	Distance from top of drill core	-9.25	1	-3	0	-3			Mean Sea Level / General definition			U-Series	Equal to	FIT-2-9H_3	DE17-007-003	Coral	135.35	0.75	135.36	0.69									Dechnik et al., 2017 Chutcharavan and Dutton, 2020	Peter Chutcharavan	2021-04-20
USeries_1061	-23.6199	152.155	Southern GBR	Fitzroy Reef			Sea Level Indicator	Single Coral	cAA and aA1 assemblages dominate. Coral assemblage cAC occurs at 10.6-11.2 m, which authors have interpreted as the same shallow paleo water depth (0-6 m) as the rest of the section, albeit in a more protected setting; solution unconformity exists at Holocene/Pleistocene boundary (10.2-10.6 m) and indicates prolonged sub-aerial exposure. Platygyra	Distance from top of drill core	-10.97	1	-6	0	-6			Mean Sea Level / General definition			U-Series	Equal to	FIT3-16C_1	DE17-008-001	Coral	127.34	0.54	127.37	0.67									Dechnik et al., 2017 Chutcharavan and Dutton, 2020	Peter Chutcharavan	2021-04-20
USeries_1062	-23.6199	152.155	Southern GBR	Fitzroy Reef			Sea Level Indicator	Single Coral	cAA and aA1 assemblages dominate. Coral assemblage cAC occurs at 10.6-11.2 m, which authors have interpreted as the same shallow paleo water depth (0-6 m) as the rest of the section, albeit in a more protected setting; solution unconformity exists at Holocene/Pleistocene boundary (10.2-10.6 m) and indicates prolonged sub-aerial exposure. Platygyra	Distance from top of drill core	-10.97	1	-6	0	-6			Mean Sea Level / General definition			U-Series	Equal to	FIT3-16C_2	DE17-008-002	Coral	130.05	0.57	130.06	0.75									Dechnik et al., 2017 Chutcharavan and Dutton, 2020	Peter Chutcharavan	2021-04-20
USeries_1063	-23.6199	152.155	Southern GBR	Fitzroy Reef			Sea Level Indicator	Single Coral	cAA and aA1 assemblages dominate. Coral assemblage cAC occurs at 10.6-11.2 m, which authors have interpreted as the same shallow paleo water depth (0-6 m) as the rest of the section, albeit in a more protected setting; solution unconformity exists at Holocene/Pleistocene boundary (10.2-10.6 m) and indicates prolonged sub-aerial exposure. Platygyra	Distance from top of drill core	-10.97	1	-6	0	-6			Mean Sea Level / General definition			U-Series	Equal to	FIT3-16C_3	DE17-008-003	Coral	129.51	0.59	129.52	0.64									Dechnik et al., 2017 Chutcharavan and Dutton, 2020	Peter Chutcharavan	2021-04-20
USeries_1064	-23.6199	152.155	Southern GBR	Fitzroy Reef			Sea Level Indicator	Single Coral	cAA and aA1 assemblages dominate. Coral assemblage cAC occurs at 10.6-11.2 m, which authors have interpreted as the same shallow paleo water depth (0-6 m) as the rest of the section, albeit in a more protected setting; solution unconformity exists at Holocene/Pleistocene boundary (10.2-10.6 m) and indicates prolonged sub-aerial exposure. Isopora	Distance from top of drill core	-13.1	1	-6	0	-6			Mean Sea Level / General definition			U-Series	Equal to	FIT3-17G_1	DE17-009-001	Coral	131.08	39.324	131.07	0.54									Dechnik et al., 2017 Chutcharavan and Dutton, 2020	Peter Chutcharavan	2021-04-20
USeries_1065	-23.6199	152.155	Southern GBR	Fitzroy Reef			Sea Level Indicator	Single Coral	cAA and aA1 assemblages dominate. Coral assemblage cAC occurs at 10.6-11.2 m, which authors have interpreted as the same shallow paleo water depth (0-6 m) as the rest of the section, albeit in a more protected setting; solution unconformity exists at Holocene/Pleistocene boundary (10.2-10.6 m) and indicates prolonged sub-aerial exposure. Isopora	Distance from top of drill core	-13.1	1	-6	0	-6			Mean Sea Level / General definition			U-Series	Equal to	FIT3-17G_2	DE17-009-002	Coral	130.78	39.234	130.78	0.58									Dechnik et al., 2017 Chutcharavan and Dutton, 2020	Peter Chutcharavan	2021-04-20
USeries_1066	-23.6199	152.155	Southern GBR	Fitzroy Reef			Sea Level Indicator	Single Coral	cAA and aA1 assemblages dominate. Coral assemblage cAC occurs at 10.6-11.2 m, which authors have interpreted as the same shallow paleo water depth (0-6 m) as the rest of the section, albeit in a more protected setting; solution unconformity exists at Holocene/Pleistocene boundary (10.2-10.6 m) and indicates prolonged sub-aerial exposure. Isopora	Distance from top of drill core	-13.1	1	-6	0	-6			Mean Sea Level / General definition			U-Series	Equal to	FIT3-17G_3	DE17-009-003	Coral	129.12	0.51	129.12	0.6									Dechnik et al., 2017 Chutcharavan and Dutton, 2020	Peter Chutcharavan	2021-04-20
USeries_1067	-23.5076	152.092	Southern GBR	One Tree Island			Sea Level Indicator	Single Coral	aA1; transition from deeper (cAC) to shallow water coral assemblages (cAA) with associated vermetid gastropods, suggests a shallowing upwards sequence starting at 18 mbsf. Acropora	Distance from top of drill core	-13.77	1	-6	0	-6			Mean Sea Level / General definition			U-Series	Equal to	OTI5-11F_1	DE17-010-001	Coral	125.65	0.68	125.64	0.5									Dechnik et al., 2017 Chutcharavan and Dutton, 2020	Peter Chutcharavan	2021-04-20
USeries_1068	-23.5076	152.092	Southern GBR	One Tree Island			Sea Level Indicator	Single Coral	aA1; transition from deeper (cAC) to shallow water coral assemblages (cAA) with associated vermetid gastropods, suggests a shallowing upwards sequence starting at 18 mbsf. Acropora	Distance from top of drill core	-13.77	1	-6	0	-6			Mean Sea Level / General definition			U-Series	Equal to	OTI5-11F_2	DE17-010-002	Coral	127.67	0.67	127.65	0.65									Dechnik et al., 2017 Chutcharavan and Dutton, 2020	Peter Chutcharavan	2021-04-20
USeries_1069	-23.5076	152.092	Southern GBR	One Tree Island			Sea Level Indicator	Single Coral	aA1; transition from deeper (cAC) to shallow water coral assemblages (cAA) with associated vermetid gastropods, suggests a shallowing upwards sequence starting at 18 mbsf. Acropora	Distance from top of drill core	-13.77	1	-6	0	-6			Mean Sea Level / General definition			U-Series	Equal to	OTI5-11F_3	DE17-010-003	Coral	127.06	0.69	127.04	0.57									Dechnik et al., 2017 Chutcharavan and Dutton, 2020	Peter Chutcharavan	2021-04-20
USeries_1070	-23.5076	152.092	Southern GBR	One Tree Island			Sea Level Indicator	Single Coral	detrial assemblages of cAD, aA2 and abundant Halimeda, indicating paleo water depth of 0-30 m. However, transition to reef framework in this section of the core has led the authors to revise the paleo-water depth interpretation to 0-20 m Symphyllia	Distance from top of drill core	-18.78	1	-20	0	-20			Mean Sea Level / General definition			U-Series	Equal to	OTI6-15C_1	DE17-011-001	Coral	138.03	41.409	138	0.66									Dechnik et al., 2017 Chutcharavan and Dutton, 2020	Peter Chutcharavan	2021-04-20
USeries_1071	-23.5076	152.092	Southern GBR	One Tree Island			Sea Level Indicator	Single Coral	detrial assemblages of cAD, aA2 and abundant Halimeda, indicating paleo water depth of 0-30 m. However, transition to reef framework in this section of the core has led the authors to revise the paleo-water depth interpretation to 0-20 m Symphyllia	Distance from top of drill core	-18.78	1	-20	0	-20			Mean Sea Level / General definition			U-Series	Equal to	OTI6-15C_2	DE17-011-002	Coral	134.28	0.81	134.3	0.65									Dechnik et al., 2017 Chutcharavan and Dutton, 2020	Peter Chutcharavan	2021-04-20
USeries_1072	-23.5076	152.092	Southern GBR	One Tree Island			Sea Level Indicator	Single Coral	detrial assemblages of cAD, aA2 and abundant Halimeda, indicating paleo water depth of 0-30 m. However, transition to reef framework in this section of the core has led the authors to revise the paleo-water depth interpretation to 0-20 m Symphyllia	Distance from top of drill core	-18.78	1	-20	0	-20			Mean Sea Level / General definition			U-Series	Equal to	OTI6-15C_3	DE17-011-003	Coral	135.46	0.7	135.45	0.69									Dechnik et al., 2017 Chutcharavan and Dutton, 2020	Peter Chutcharavan	2021-04-20
USeries_1076	19.3527	-81.0967	Rogers Wreck Point	Ironshore Formation, drill core #14			Sea Level Indicator	Single Coral	Unit D, Zone III: shallow lagoon protected by an offshore reef Siderastrea siderea	Not reported	-1.88	1	-10	0	-10			Mean Sea Level / General definition			U-Series	Equal to	RWP#14	VE99-004-001	Coral	129	6	130.43	6									Vezina et al., 1999 Chutcharavan and Dutton, 2020	Peter Chutcharavan	2021-04-20
USeries_1077	19.3527	-81.0967	Rogers Wreck Point	Ironshore Formation, drill core #15			Sea Level Indicator	Single Coral	Unit D, Zone III: shallow lagoon protected by an offshore reef Siderastrea siderea	Not reported	-5.38	1	-10	0	-10			Mean Sea Level / General definition			U-Series	Equal to	RWP#15	VE99-005-001	Coral	133.94	1.59	135.48	1.59									Vezina et al., 1999 Chutcharavan and Dutton, 2020	Peter Chutcharavan	2021-04-20
USeries_1085	19.2806	-81.3761	west coast of Grand Cayman	Paul Bodden's quarry			Sea Level Indicator	Single Coral	Unit D (Large Porites thickets) Porites sp.	Not reported	2	1	-10	0	-10			Mean Sea Level / General definition			U-Series	Equal to	PBQA-13-2001	CO07-016-001	Coral	136.34	3.53	138.73	3.53									Coyne et al., 2007 Chutcharavan and Dutton, 2020	Peter Chutcharavan	2021-04-20
USeries_1086	19.374	-81.3798	west coast of North Sound	Morgan's Harbour			Sea Level Indicator	Single Coral	Unit D (The lower unit [in Morgan's Harbour/Salt Creek] is characterized by patch reef, 5-15 m diameter, that are formed of a diverse array of well-preserved corals) Montastraea annularis	Not reported	1	1	-10	0	-10			Mean Sea Level / General definition			U-Series	Equal to	MH1-6" asl	CO07-017-001	Coral	122	2.61	123.56	2.61									Coyne et al., 2007 Chutcharavan and Dutton, 2020	Peter Chutcharavan	2021-04-20
USeries_1087	19.374	-81.3798	west coast of North Sound	Morgan's Harbour			Sea Level Indicator	Single Coral	Unit D (The lower unit [in Morgan's Harbour/Salt Creek] is characterized by patch reef, 5-15 m diameter, that are formed of a diverse array of well-preserved corals) Montastraea annularis	Not reported	1	1	-10	0	-10			Mean Sea Level / General definition			U-Series	Equal to	MH1-2' asl	CO07-018-001	Coral	123.27	2.71	124.11	2.71									Coyne et al., 2007 Chutcharavan and Dutton, 2020	Peter Chutcharavan	2021-04-20
USeries_1088	19.3569	-81.3699	west coast of North Sound				Sea Level Indicator	Single Coral	Unit D (Coral patch reef) Montastraea annularis	Not reported	2	1	-10	0	-10			Mean Sea Level / General definition			U-Series	Equal to	VDM4-1-99	CO07-019-001	Coral	129.03	3.09	130.51	3.09									Coyne et al., 2007 Chutcharavan and Dutton, 2020	Peter Chutcharavan	2021-04-20
USeries_1089	19.3569	-81.3699	west coast of North Sound				Sea Level Indicator	Single Coral	Unit D (Coral patch reef) unknown	Not reported	2	1	-10	0	-10			Mean Sea Level / General definition			U-Series	Equal to	VDM4-1-99B	CO07-020-001	Coral	135.7	5.22	137.97	5.22									Coyne et al., 2007 Chutcharavan and Dutton, 2020	Peter Chutcharavan	2021-04-20
USeries_1160	19.85	-73.2667	Haiti	northwest coast			Sea Level Indicator	Single Coral	reef crest Acropora palmata	Not reported	52	3	5	0	5			Mean Sea Level / General definition			U-Series	Equal to	C1	BA90-021-001	Coral	121.9	1.1	122.81	1.1									Bard et al., 1990 Chutcharavan and Dutton, 2020	Peter Chutcharavan	2021-04-20
USeries_1161	19.85	-73.2667	Haiti	northwest coast			Sea Level Indicator	Single Coral	reef crest Acropora palmata	Not reported	52	3	5	0	5			Mean Sea Level / General definition			U-Series	Equal to	C-4 #1	BA90-022-001	Coral	123.6	1.6	124.51	1.6									Bard et al., 1990 Chutcharavan and Dutton, 2020	Peter Chutcharavan	2021-04-20
USeries_1162	19.85	-73.2667	Haiti	northwest coast			Sea Level Indicator	Single Coral	reef crest Acropora palmata	Not reported	52	3	5	0	5			Mean Sea Level / General definition			U-Series	Equal to	C-4 #2	BA90-022-002	Coral	124.9	1.3	125.9	1.3									Bard et al., 1990 Chutcharavan and Dutton, 2020	Peter Chutcharavan	2021-04-20
USeries_1165	21.353	-158.13	Kahe Beach State Park, Oahu	upper reef			Sea Level Indicator	Single Coral	upper reef Porites lobata	Total station or Auto/hand level	9	1	0	0	-67			Mean Sea Level / General definition			U-Series	Equal to	OHE 1c	HE07-007-001	Coral	119.37	0.57	119.707	0.638159									Hearty et al., 2007 Chutcharavan and Dutton, 2020	Peter Chutcharavan	2021-04-20
USeries_1166	21.5295	-158.228	Makua Valley, Kaena Pt South, Oahu	upper reef			Sea Level Indicator	Single Coral	upper reef Porites lobata	Total station or Auto/hand level	8	1	0	0	-67			Mean Sea Level / General definition			U-Series	Equal to	OMU1b	HE07-008-001	Coral	123.8	1.3	124.093	1.29583									Hearty et al., 2007 Chutcharavan and Dutton, 2020	Peter Chutcharavan	2021-04-20
USeries_1167	21.45	-157.733	Mokapu Point, Oahu, Hawaii	upper reef			Sea Level Indicator	Single Coral	upper reef Pocillopora meandrina	Total station or Auto/hand level	9	1	0	0	-56			Mean Sea Level / General definition			U-Series	Equal to	OKP 2c	HE07-009-001	Coral	130.9	0.46	131.26	0.46									Hearty et al., 2007 Chutcharavan and Dutton, 2020	Peter Chutcharavan	2021-04-20
USeries_1168	21.45	-157.733	Mokapu Point, Oahu, Hawaii	upper reef			Sea Level Indicator	Single Coral	upper reef Pocillopora meandrina	Total station or Auto/hand level	8.5	1	0	0	-56			Mean Sea Level / General definition			U-Series	Equal to	OKP 3c	HE07-010-001	Coral	130.97	0.49	131.34	0.51									Hearty et al., 2007 Chutcharavan and Dutton, 2020	Peter Chutcharavan	2021-04-20
USeries_1170	21.7	-157.967	Kahuku Point, Oahu, Hawaii	Waimanalo FM			Sea Level Indicator	Single Coral	"growth position"; reef limestone with in situ coral heads Porites sp.	Total station or Auto/hand level	1.4	2	-4	0	-66			Mean Sea Level / General definition			U-Series	Equal to	HA-13-B	MU02-028-001	Coral	113	0.7	113.29	0.68									Muhs et al., 2002a Chutcharavan and Dutton, 2020	Peter Chutcharavan	2021-04-20
USeries_1171	21.7	-157.967	Kahuku Point, Oahu, Hawaii	Waimanalo FM			Sea Level Indicator	Single Coral	"growth position"; reef limestone with in situ coral heads Porites sp.	Total station or Auto/hand level	1.4	2	-4	0	-66			Mean Sea Level / General definition			U-Series	Equal to	HA-13-C	MU02-029-001	Coral	121	1.3	121.34	1.32									Muhs et al., 2002a Chutcharavan and Dutton, 2020	Peter Chutcharavan	2021-04-20
USeries_1206	21.5794	-158.237	N. shore, E. of Kaena Pt., Oahu, Hawaii	Waimanalo FM			Sea Level Indicator	Single Coral	in situ coral/algal heads Porites sp.	Total station or Auto/hand level	1	2	-4	0	-66			Mean Sea Level / General definition			U-Series	Equal to	HA-21-(1)	MU02-055-001	Coral	126.2	0.7	126.547	0.729939									Muhs et al., 2002a Chutcharavan and Dutton, 2020	Peter Chutcharavan	2021-04-20
USeries_1212	21.5794	-158.237	East Kaena Point Reef (EKP), Oahu, Hawaii	Waimanalo FM			Sea Level Indicator	Single Coral	in situ, between 1 & 3m Porites sp.	Not reported	2	2	-4	0	-66			Mean Sea Level / General definition			U-Series	Equal to	20-Pr1	SZ94-007-001	Coral	110.5	3.8	110.843	3.8608									Szabo et al., 1994 Chutcharavan and Dutton, 2020	Peter Chutcharavan	2021-04-20
USeries_1213	21.5794	-158.237	East Kaena Point Reef (EKP), Oahu, Hawaii	Waimanalo FM			Sea Level Indicator	Single Coral	in situ, between 1 & 3m Porites sp.	Not reported	2	2	-4	0	-66			Mean Sea Level / General definition			U-Series	Equal to	21-Pr1	SZ94-008-001	Coral	114.8	2.1	115.142	2.11492									Szabo et al., 1994 Chutcharavan and Dutton, 2020	Peter Chutcharavan	2021-04-20
USeries_1222	21.7	-157.967	Kahuku Point (KAH), Oahu, Hawaii	Waimanalo FM			Sea Level Indicator	Single Coral	in situ, between 1 & 3m Porites sp.	Not reported	2	2	-4	0	-66			Mean Sea Level / General definition			U-Series	Equal to	1-Pr1	SZ94-018-001	Coral	120.3	2.5	120.64	2.55									Szabo et al., 1994 Chutcharavan and Dutton, 2020	Peter Chutcharavan	2021-04-20
USeries_1223	21.7	-157.967	Kahuku Point (KAH), Oahu, Hawaii	Waimanalo FM			Sea Level Indicator	Single Coral	in situ, between 1 & 3m Porites sp.	Not reported	2	2	-4	0	-66			Mean Sea Level / General definition			U-Series	Equal to	13-Pr1	SZ94-019-001	Coral	121.7	1.5	122	1.51									Szabo et al., 1994 Chutcharavan and Dutton, 2020	Peter Chutcharavan	2021-04-20
USeries_1224	21.7	-157.967	Kahuku Point (KAH), Oahu, Hawaii	Waimanalo FM			Sea Level Indicator	Single Coral	in situ, between 1 & 3m Porites sp.	Not reported	2	2	-4	0	-66			Mean Sea Level / General definition			U-Series	Equal to	2-Pr1	SZ94-020-001	Coral	122.1	1.3	122.43	1.35									Szabo et al., 1994 Chutcharavan and Dutton, 2020	Peter Chutcharavan	2021-04-20
USeries_1227	21.45	-157.733	Mokapu Point (MP), Oahu, Hawaii	Waimanalo FM			Sea Level Indicator	Single Coral	in situ Pocillopora sp.	Not reported	8.6	2	0	0	-64			Mean Sea Level / General definition			U-Series	Equal to	19-Pc2	SZ94-023-001	Coral	125	3.8	125.42	3.82									Szabo et al., 1994 Chutcharavan and Dutton, 2020	Peter Chutcharavan	2021-04-20
USeries_1237	21.45	-157.733	Mokapu Point (MP), Oahu, Hawaii	Waimanalo FM			Sea Level Indicator	Single Coral	in situ Porites sp.	Not reported	8.6	2	-4	0	-66			Mean Sea Level / General definition			U-Series	Equal to	18-Pr2	SZ94-032-001	Coral	123.2	2.6	123.54	2.59									Szabo et al., 1994 Chutcharavan and Dutton, 2020	Peter Chutcharavan	2021-04-20
USeries_1238	21.45	-157.733	Mokapu Point (MP), Oahu, Hawaii	Waimanalo FM			Sea Level Indicator	Single Coral	in situ Porites sp.	Not reported	7.3	2	-4	0	-66			Mean Sea Level / General definition			U-Series	Equal to	19-Pr1	SZ94-033-001	Coral	129.9	1.5	130.29	1.47									Szabo et al., 1994 Chutcharavan and Dutton, 2020	Peter Chutcharavan	2021-04-20
USeries_1239	21.45	-157.733	Mokapu Point (MP), Oahu, Hawaii	Waimanalo FM			Sea Level Indicator	Single Coral	in situ Porites sp.	Not reported	7.3	2	-4	0	-66			Mean Sea Level / General definition			U-Series	Equal to	19-Pr2	SZ94-034-001	Coral	131	2.7	131.38	2.67									Szabo et al., 1994 Chutcharavan and Dutton, 2020	Peter Chutcharavan	2021-04-20
USeries_1240	21.353	-158.13	Kahe Point, Oahu, Hawaii	road cut			Sea Level Indicator	Single Coral	coral head in apparent growth position Leptoseris spp.	Not reported	10.5	2	-9	0	-65			Mean Sea Level / General definition			U-Series	Equal to	OA-GM-95A	MC10-001-001	Coral	125.5	0.96	126.04	0.96									McMurtry et al., 2010 Chutcharavan and Dutton, 2020	Peter Chutcharavan	2021-04-20
USeries_1245	-9.5	120.2	Sumba Island	Cape Laundi			Sea Level Indicator	Single Coral	Lagoonal and/or outer slopes of sheltered reefs Diploastrea heliopra	Not reported	13.91	5	-10	-5	-15			Mean Low Water Springs			U-Series	Equal to	SBA16	BR96-002-001	Coral	113.2	0.9	114.53	0.9									Bard et al., 1996 Chutcharavan and Dutton, 2020	Peter Chutcharavan	2021-04-20
USeries_1246	-9.5	120.2	Sumba Island	Cape Laundi			Sea Level Indicator	Single Coral	Not Reported Diploastrea heliopora	Not reported	1.91	1	-6	0	-12			Mean Low Water Springs			U-Series	Equal to	SBA9	BR96-003-001	Coral	131.2	1	132.92	1									Bard et al., 1996 Chutcharavan and Dutton, 2020	Peter Chutcharavan	2021-04-20
USeries_1247	-9.5	120.2	Sumba Island	Cape Laundi			Sea Level Indicator	Single Coral	Not Reported Favia	Not reported	1.91	1	-34	0	-48			Mean Low Water Springs			U-Series	Equal to	SBA13	BR96-005-001	Coral	130	1.2	131.48	1.2									Bard et al., 1996 Chutcharavan and Dutton, 2020	Peter Chutcharavan	2021-04-20
USeries_1248	-9.5	120.2	Sumba Island	Cape Laundi			Sea Level Indicator	Single Coral	Not Reported Favia	Not reported	38.91	5	-34	0	-48			Mean Low Water Springs			U-Series	Equal to	SBA23	BR96-006-001	Coral	140.8	1.3	142.86	1.3									Bard et al., 1996 Chutcharavan and Dutton, 2020	Peter Chutcharavan	2021-04-20
USeries_1249	-9.5	120.2	Sumba Island	Cape Laundi			Sea Level Indicator	Single Coral	Not Reported Favia stelligera	Not reported	1.91	1	-3	0	-46			Mean Low Water Springs			U-Series	Equal to	SBA14	BR96-007-001	Coral	119.3	1	120.62	1									Bard et al., 1996 Chutcharavan and Dutton, 2020	Peter Chutcharavan	2021-04-20
USeries_1250	-9.5	120.2	Sumba Island	Cape Laundi			Sea Level Indicator	Single Coral	Not Reported Goniastrea	Not reported	1.91	1	-5	0	-46			Mean Low Water Springs			U-Series	Equal to	SBA10	BR96-008-001	Coral	86	0.6	86.91	0.6									Bard et al., 1996 Chutcharavan and Dutton, 2020	Peter Chutcharavan	2021-04-20
USeries_1251	-9.5	120.2	Sumba Island	Cape Laundi			Sea Level Indicator	Single Coral	Not Reported Goniastrea	Not reported	1.91	1	-5	0	-46			Mean Low Water Springs			U-Series	Equal to	SBA11	BR96-009-001	Coral	120.8	0.9	122.46	0.9									Bard et al., 1996 Chutcharavan and Dutton, 2020	Peter Chutcharavan	2021-04-20
USeries_1252	-9.5	120.2	Sumba Island	Cape Laundi			Sea Level Indicator	Single Coral	Lagoonal and/or outer slopes of sheltered reefs Leptastrea	Not reported	8.91	5	-10	-5	-15			Mean Low Water Springs			U-Series	Equal to	SBA19	BR96-011-001	Coral	124.8	0.9	126.19	0.9									Bard et al., 1996 Chutcharavan and Dutton, 2020	Peter Chutcharavan	2021-04-20
USeries_1253	-9.5	120.2	Sumba Island	Cape Laundi			Sea Level Indicator	Single Coral	Not Reported Oulophyllia crispa	Not reported	1.91	1	-5	-1.9	-18			Mean Low Water Springs			U-Series	Equal to	SBA15	BR96-012-001	Coral	131.5	1	133.11	1									Bard et al., 1996 Chutcharavan and Dutton, 2020	Peter Chutcharavan	2021-04-20
USeries_1254	-9.5	120.2	Sumba Island	Cape Laundi			Sea Level Indicator	Single Coral	Lagoonal and/or outer slopes of sheltered reefs Oulophyllia	Not reported	8.91	5	-10	-5	-15			Mean Low Water Springs			U-Series	Equal to	SBA21	BR96-013-001	Coral	135.7	1.3	137.47	1.3									Bard et al., 1996 Chutcharavan and Dutton, 2020	Peter Chutcharavan	2021-04-20
USeries_1255	-9.5	120.2	Sumba Island	Cape Laundi			Sea Level Indicator	Single Coral	Lagoonal and/or outer slopes of sheltered reefs Pavona clavus	Not reported	8.91	5	-10	-5	-15			Mean Low Water Springs			U-Series	Equal to	SBA18	BR96-014-001	Coral	93.4	0.6	94.41	0.6									Bard et al., 1996 Chutcharavan and Dutton, 2020	Peter Chutcharavan	2021-04-20
USeries_1256	-9.5	120.2	Sumba Island	Cape Laundi			Sea Level Indicator	Single Coral	Lagoonal and/or outer slopes of sheltered reefs Pavona clavus	Not reported	8.91	5	-10	-5	-15			Mean Low Water Springs			U-Series	Equal to	SBA20	BR96-015-001	Coral	117.8	1	119.13	1									Bard et al., 1996 Chutcharavan and Dutton, 2020	Peter Chutcharavan	2021-04-20
USeries_1257	-9.5	120.2	Sumba Island	Cape Laundi			Sea Level Indicator	Single Coral	Lagoonal and/or outer slopes of sheltered reefs Porites nigrescens	Not reported	13.91	5	-10	-5	-15			Mean Low Water Springs			U-Series	Equal to	SBA17	BR96-016-001	Coral	125.2	0.9	126.54	0.9									Bard et al., 1996 Chutcharavan and Dutton, 2020	Peter Chutcharavan	2021-04-20
USeries_1258	-9.5	120.2	Sumba Island	Cape Laundi			Sea Level Indicator	Single Coral	Not Reported Porites (micro-atoll)	Not reported	1.91	1	-4	0	-66			Mean Low Water Springs			U-Series	Equal to	SBA12	BR96-017-001	Coral	107.6	0.7	108.78	0.7									Bard et al., 1996 Chutcharavan and Dutton, 2020	Peter Chutcharavan	2021-04-20
USeries_1259	-9.5	120.2	Sumba Island	Cape Laundi			Sea Level Indicator	Single Coral	Not Reported Porites	Not reported	38.91	5	-4	0	-66			Mean Low Water Springs			U-Series	Equal to	SBA22	BR96-018-001	Coral	129.9	0.9	131.53	0.9									Bard et al., 1996 Chutcharavan and Dutton, 2020	Peter Chutcharavan	2021-04-20
USeries_1266	-22.4762	166.469	Amedee Inlet	Amedee reef; core AM1			Sea Level Indicator	Single Coral	coral and coralline algal framework Acropora sp.	Not reported	-13.7	1	0	0	-18			Mean Low Tide (MLT)			U-Series	Equal to	AM1-15.2A	FR06-007-001	Coral	131.8	1.8	132.08	1.76925									Frank et al., 2006 Chutcharavan and Dutton, 2020	Peter Chutcharavan	2021-04-20
USeries_1267	-22.4762	166.469	Amedee Inlet	Amedee reef; core AM1			Sea Level Indicator	Single Coral	coral and coralline algal framework Acropora sp.	Not reported	-12.5	1	-2.4	0	-18			Mean Low Tide (MLT)			U-Series	Equal to	AM1-14P	FR06-008-001	Coral	132.5	2.1	132.74	2									Frank et al., 2006 Chutcharavan and Dutton, 2020	Peter Chutcharavan	2021-04-20
USeries_1268	-22.4762	166.469	Amedee Inlet	Amedee reef; core AM1			Sea Level Indicator	Single Coral	coral and coralline algal framework Acropora sp.	Not reported	-19.65	1	-2.4	0	-18			Mean Low Tide (MLT)			U-Series	Equal to	AM1-21.15A	FR06-009-001	Coral	143.8	2.3	144.06	2.35									Frank et al., 2006 Chutcharavan and Dutton, 2020	Peter Chutcharavan	2021-04-20
USeries_1269	-22.4783	166.466	Amedee Inlet	Amedee reef; core AM5			Sea Level Indicator	Single Coral	coral and coralline algal framework Alveopora sp.	Not reported	-28.58	1	-5	-2	-48.2			Mean Low Tide (MLT)			U-Series	Equal to	AM5-50As	FR06-010-001	Coral	114	2	114.58	2.06									Frank et al., 2006 Chutcharavan and Dutton, 2020	Peter Chutcharavan	2021-04-20
USeries_1270	-22.4762	166.469	Amedee Inlet	Amedee reef; core AM1			Sea Level Indicator	Single Coral	coral and coralline algal framework Acropora sp.	Not reported	-10.9	1	-2.4	0	-18			Mean Low Tide (MLT)			U-Series	Equal to	AM1-12.4A	FR06-012-001	Coral	131.6	1.7	131.8	1.7									Frank et al., 2006 Chutcharavan and Dutton, 2020	Peter Chutcharavan	2021-04-20
USeries_1271	-22.4787	166.467	Amedee Inlet	Amedee reef; core AM2			Sea Level Indicator	Single Coral	coral and coralline algal framework Echinopora sp.	Not reported	-12.75	1	-5	0	-21			Mean Low Tide (MLT)			U-Series	Equal to	AM2-14.25E	FR06-013-001	Coral	127	1.9	127.7	2.06									Frank et al., 2006 Chutcharavan and Dutton, 2020	Peter Chutcharavan	2021-04-20
USeries_1272	-22.4787	166.467	Amedee Inlet	Amedee reef; core AM2			Sea Level Indicator	Single Coral	coral and coralline algal framework Faviidae (reported as "Faviidé")	Not reported	-12.4	1	-7.6	-2.4	-38.6			Mean Low Tide (MLT)			U-Series	Equal to	AM2-13.9F	FR06-014-001	Coral	123.6	2.5	123.8	2.51									Frank et al., 2006 Chutcharavan and Dutton, 2020	Peter Chutcharavan	2021-04-20
USeries_1273	-22.478	166.466	Amedee Inlet	Amedee reef; core AM4			Sea Level Indicator	Single Coral	coral and coralline algal framework Favites sp.	Not reported	-30.83	1	-4	0	-17.6			Mean Low Tide (MLT)			U-Series	Equal to	AM4-30Fs	FR06-015-001	Coral	129.3	2.4	129.56	2.41									Frank et al., 2006 Chutcharavan and Dutton, 2020	Peter Chutcharavan	2021-04-20
USeries_1274	-22.478	166.466	Amedee Inlet	Amedee reef; core AM4			Sea Level Indicator	Single Coral	coral and coralline algal framework Goniopora sp.	Not reported	-32.48	1	-5	0	-45			Mean Low Tide (MLT)			U-Series	Equal to	AM4-34G	FR06-021-001	Coral	117.1	1.8	117.273	1.82625									Frank et al., 2006 Chutcharavan and Dutton, 2020	Peter Chutcharavan	2021-04-20
USeries_1275	-22.478	166.466	Amedee Inlet	Amedee reef; core AM4			Sea Level Indicator	Single Coral	coral and coralline algal framework Goniopora sp.	Not reported	-27.88	1	-5	0	-45			Mean Low Tide (MLT)			U-Series	Equal to	AM4-23G	FR06-022-001	Coral	127.6	2.2	127.875	2.20359									Frank et al., 2006 Chutcharavan and Dutton, 2020	Peter Chutcharavan	2021-04-20
USeries_1276	-22.4762	166.469	Amedee Inlet	Amedee reef; core AM1			Sea Level Indicator	Single Coral	coral and coralline algal framework Porites sp.	Not reported	-12.6	1	-4	0	-66			Mean Low Tide (MLT)			U-Series	Equal to	AM1-14.02P	FR06-024-001	Coral	136	2	136.168	2.0562									Frank et al., 2006 Chutcharavan and Dutton, 2020	Peter Chutcharavan	2021-04-20
USeries_1277	-22.478	166.466	Amedee Inlet	Amedee reef; core AM4			Sea Level Indicator	Single Coral	coral and coralline algal framework Porites sp.	Not reported	-18.88	1	-4	0	-66			Mean Low Tide (MLT)			U-Series	Equal to	AM4-15P	FR06-026-001	Coral	144.8	2.5	145.19	2.51									Frank et al., 2006 Chutcharavan and Dutton, 2020	Peter Chutcharavan	2021-04-20
USeries_1278	-22.4783	166.466	Amedee Inlet	Amedee reef; core AM5			Sea Level Indicator	Single Coral	coral and coralline algal framework Porites sp.	Not reported	-17.58	1	-4	0	-66			Mean Low Tide (MLT)			U-Series	Equal to	AM5-22P	FR06-027-001	Coral	146.5	2.6	146.877	2.68013									Frank et al., 2006 Chutcharavan and Dutton, 2020	Peter Chutcharavan	2021-04-20
USeries_1280	-22.478	166.466	Amedee Inlet	Amedee reef; core AM4			Sea Level Indicator	Single Coral	coral and coralline algal framework, coated in red algae unknown - "likely a poritid coral"	Not reported	-16.38	1	-4	0	-66			Mean Low Tide (MLT)			U-Series	Equal to	AM4-14-1	FR06-034-001	Coral	132.2	1.9	133.01	1.89									Frank et al., 2006 Chutcharavan and Dutton, 2020	Peter Chutcharavan	2021-04-20
USeries_1281	-22.478	166.466	Amedee Inlet	Amedee reef; core AM4			Sea Level Indicator	Single Coral	coral and coralline algal framework, coated in red algae unknown - "likely a poritid coral"	Not reported	-16.38	1	-4	0	-66			Mean Low Tide (MLT)			U-Series	Equal to	AM4-14-2	FR06-034-002	Coral	124.7	1.6	124.86	1.5587									Frank et al., 2006 Chutcharavan and Dutton, 2020	Peter Chutcharavan	2021-04-20
USeries_1282	-22.478	166.466	Amedee Inlet	Amedee reef; core AM4			Sea Level Indicator	Single Coral	coral and coralline algal framework, coated in red algae unknown - "likely a poritid coral"	Not reported	-16.38	1	-4	0	-66			Mean Low Tide (MLT)			U-Series	Equal to	AM4-14-3	FR06-034-003	Coral	134.7	2.7	134.983	2.67571									Frank et al., 2006 Chutcharavan and Dutton, 2020	Peter Chutcharavan	2021-04-20
USeries_1283	-22.478	166.466	Amedee Inlet	Amedee reef; core AM4			Sea Level Indicator	Single Coral	coral and coralline algal framework, coated in red algae unknown - "likely a poritid coral"	Not reported	-16.38	1	-4	0	-66			Mean Low Tide (MLT)			U-Series	Equal to	AM4-14-4	FR06-034-004	Coral	127.4	3.6	127.559	3.63704									Frank et al., 2006 Chutcharavan and Dutton, 2020	Peter Chutcharavan	2021-04-20
USeries_1284	-22.478	166.466	Amedee Inlet	Amedee reef; core AM4			Sea Level Indicator	Single Coral	coral and coralline algal framework, coated in red algae unknown - "likely a poritid coral"	Not reported	-16.38	1	-4	0	-66			Mean Low Tide (MLT)			U-Series	Equal to	AM4-14-5	FR06-034-005	Coral	145.3	4.8	145.578	4.80453									Frank et al., 2006 Chutcharavan and Dutton, 2020	Peter Chutcharavan	2021-04-20
USeries_1285	-19.0647	-169.937	Niue Island	Utuko			Sea Level Indicator	Single Coral	2 m-high coral head associated with gravel clasts of other massive corals, interpreted as infill of karstic channel Porites sp.	Total station or Auto/hand level	2.67	1	-4	0	-66			Height of Living Corals (HLC)			U-Series	Equal to	NT11	KE12-001-001	Coral	133.3	0.91	133.51	1.04									Kennedy et al., 2012 Chutcharavan and Dutton, 2020	Peter Chutcharavan	2021-04-20
USeries_1292	-6.10346	147.603	Huon Peninsula	Kilasairo			Sea Level Indicator	Single Coral	Not Reported Porites sp.	Not reported	195	2	0	0	-45			Mean Sea Level / General definition			U-Series	Equal to	KIL-5	ST93-009-001	Coral	116.8	1.15	117.29	1.15									Cutler et al., 2003 Chutcharavan and Dutton, 2020	Peter Chutcharavan	2021-04-20
USeries_1325	-6.10346	147.603	Huon Peninsula	Kilasairo			Sea Level Indicator	Single Coral	collcted from a large overhang ~30 m below VIIb crest Porites lutea	Not reported	195	3	0	0	-45			Mean Sea Level / General definition			U-Series	Equal to	KIL-5 (b)	ST93-009-002	Coral	116.4	1.8	117.16	1.6									Stein et al., 1993 Chutcharavan and Dutton, 2020	Peter Chutcharavan	2021-04-20
USeries_1326	-6.10346	147.603	Huon Peninsula	Kilasairo			Sea Level Indicator	Single Coral	collcted from a large overhang ~30 m below VIIb crest Porites lutea	Not reported	195	3	0	0	-45			Mean Sea Level / General definition			U-Series	Equal to	KIL-5 (a-2)	ST93-009-003	Coral	117.6	1.2	118.55	1.15									Stein et al., 1993 Chutcharavan and Dutton, 2020	Peter Chutcharavan	2021-04-20
USeries_1327	-6.10346	147.603	Huon Peninsula	Kilasairo			Sea Level Indicator	Single Coral	collcted from a large overhang ~30 m below VIIb crest Porites lutea	Not reported	195	3	0	0	-45			Mean Sea Level / General definition			U-Series	Equal to	KIL-5 (a-1)	ST93-009-004	Coral	119.5	1.2	120.28	1.12									Stein et al., 1993 Chutcharavan and Dutton, 2020	Peter Chutcharavan	2021-04-20
USeries_1329	-6.10346	147.603	Huon Peninsula	Sialum (near to)			Sea Level Indicator	Single Coral	growth position Cyphastrea serailia	Not reported	203	3	-5	-1	-11.48			Mean Sea Level / General definition			U-Series	Equal to	SIAL-M-3	ST93-011-001	Coral	134	1.9	135.1	1.9									Stein et al., 1993 Chutcharavan and Dutton, 2020	Peter Chutcharavan	2021-04-20
USeries_1359	-4.36978	55.8268	La Digue Island	Point Source d'Argent/Sec. 1			Sea Level Indicator	Single Coral	Point Source d'Argent unit 2: Single coral colonies with coralline algae Goniastrea	Not reported	2.7	2	-2	0	-2			Mean Sea Level / General definition			U-Series	Equal to	90/3 wall	IS99-002-001	Coral	122.5	1.4	122.69	1.49									Israelson and Wohlfarth, 1999 Chutcharavan and Dutton, 2020	Peter Chutcharavan	2021-04-20
USeries_1360	-4.36978	55.8268	La Digue Island	Point Source d'Argent/Sec. 1			Sea Level Indicator	Single Coral	Point Source d'Argent unit 2: Single coral colonies with coralline algae Goniastrea	Not reported	2.7	2	-2	0	-2			Mean Sea Level / General definition			U-Series	Equal to	90/3 whole	IS99-002-002	Coral	122.5	1.1	122.92	1.02									Israelson and Wohlfarth, 1999 Chutcharavan and Dutton, 2020	Peter Chutcharavan	2021-04-20
USeries_1361	-4.36978	55.8268	La Digue Island	Point Source d'Argent/Sec. 1			Sea Level Indicator	Single Coral	Point Source d'Argent unit 2: Single coral colonies with coralline algae Goniastrea	Not reported	2.7	2	-2	0	-2			Mean Sea Level / General definition			U-Series	Equal to	90/2	IS99-003-001	Coral	123.6	1.1	124.52	1.27									Israelson and Wohlfarth, 1999 Chutcharavan and Dutton, 2020	Peter Chutcharavan	2021-04-20
USeries_1362	-4.37565	55.8426	La Digue Island	Grand Anse/Sec. 2			Sea Level Indicator	Single Coral	Grand' Anse unit 2: Fairly large coral colonies Goniastrea	Not reported	2.8	2	-2	0	-2			Mean Sea Level / General definition			U-Series	Equal to	90/8	IS99-004-001	Coral	125.6	2.8	125.91	3.08									Israelson and Wohlfarth, 1999 Chutcharavan and Dutton, 2020	Peter Chutcharavan	2021-04-20
USeries_1363	-4.36978	55.8268	La Digue Island	Point Source d'Argent/Sec. 1			Sea Level Indicator	Single Coral	Point Source d'Argent unit 9: Alternating layers of domal coral colonies and laminated coralline algae (0.5 - 3 mm) Goniastrea	Not reported	3.75	2	-2	0	-2			Mean Sea Level / General definition			U-Series	Equal to	90/6	IS99-005-001	Coral	127.5	1.7	127.81	1.62									Israelson and Wohlfarth, 1999 Chutcharavan and Dutton, 2020	Peter Chutcharavan	2021-04-20
USeries_1364	-4.37565	55.8426	La Digue Island	Grand Anse/Sec. 2			Sea Level Indicator	Single Coral	Grand' Anse unit 3: Alternating layers of corals (2-8 cm), coralline, algae-vermetids (0.5-3 cm) locally with quartz grains, laminated coralline algae (0.2-0.5 cm), encrusting foraminifers (0.5 cm) and coralline algae-foraminifers (3 cm) Goniastrea	Not reported	3.45	2	-2	0	-2			Mean Sea Level / General definition			U-Series	Equal to	90/10	IS99-006-001	Coral	127.9	2.8	128.3	2.91									Israelson and Wohlfarth, 1999 Chutcharavan and Dutton, 2020	Peter Chutcharavan	2021-04-20
USeries_1365	-4.37565	55.8426	La Digue Island	Grand Anse/Sec. 2			Sea Level Indicator	Single Coral	Grand' Anse unit 3: Alternating layers of corals (2-8 cm), coralline, algae-vermetids (0.5-3 cm) locally with quartz grains, laminated coralline algae (0.2-0.5 cm), encrusting foraminifers (0.5 cm) and coralline algae-foraminifers (3 cm) Goniastrea	Not reported	3.1	2	-2	0	-2			Mean Sea Level / General definition			U-Series	Equal to	90/9	IS99-007-001	Coral	128.7	1.6	129.13	1.63									Israelson and Wohlfarth, 1999 Chutcharavan and Dutton, 2020	Peter Chutcharavan	2021-04-20
USeries_1366	-4.36978	55.8268	La Digue Island	Point Source d'Argent/Sec. 1			Sea Level Indicator	Single Coral	Point Source d'Argent unit 9: Alternating layers of domal coral colonies and laminated coralline algae (0.5 - 3 mm) Goniastrea	Not reported	3.5	2	-2	0	-2			Mean Sea Level / General definition			U-Series	Equal to	90/5	IS99-008-001	Coral	129.2	2.2	129.49	2.34									Israelson and Wohlfarth, 1999 Chutcharavan and Dutton, 2020	Peter Chutcharavan	2021-04-20
USeries_1367	-4.36978	55.8268	La Digue Island	Point Source d'Argent/Sec. 1			Sea Level Indicator	Single Coral	Point Source d'Argent unit 9: Alternating layers of domal coral colonies and laminated coralline algae (0.5 - 3 mm) Goniastrea	Not reported	4	2	-2	0	-2			Mean Sea Level / General definition			U-Series	Equal to	90/7	IS99-009-001	Coral	130.7	2.1	130.97	2.13									Israelson and Wohlfarth, 1999 Chutcharavan and Dutton, 2020	Peter Chutcharavan	2021-04-20
USeries_1368	-4.36978	55.8268	La Digue Island	Point Source d'Argent/Sec. 1			Sea Level Indicator	Single Coral	Point Source d'Argent unit 4: Single coral colonies with coralline algae Porites	Not reported	2.9	2	-4	0	-66			Mean Sea Level / General definition			U-Series	Equal to	90/4	IS99-010-001	Coral	134.5	2.8	134.91	3.9									Israelson and Wohlfarth, 1999 Chutcharavan and Dutton, 2020	Peter Chutcharavan	2021-04-20
USeries_1369	-4.37565	55.8426	La Digue Island	Grand Anse, Site 11			Sea Level Indicator	Single Coral	Near the base of the outcrop; in situ coral framework composed 30 cm thick interval dominated by encrusting and subassive Faviids sub-massive Favites	Total station or Auto/hand level	3.4	0.2	-2	0	-2			Mean Low Water Springs			U-Series	Equal to	SY-09a	DU15-001-001	Coral	143	1	142.84	0.95									Dutton et al., 2015 Chutcharavan and Dutton, 2020	Peter Chutcharavan	2021-04-20
USeries_1370	-4.37565	55.8426	La Digue Island	Grand Anse, Site 11			Sea Level Indicator	Single Coral	Near the base of the outcrop; in situ coral framework composed 30 cm thick interval dominated by encrusting and subassive Faviids sub-massive Favites	Total station or Auto/hand level	3.4	0.2	-2	0	-2			Mean Low Water Springs			U-Series	Equal to	SY-09b	DU15-001-002	Coral	126	0.8	125.88	0.79									Dutton et al., 2015 Chutcharavan and Dutton, 2020	Peter Chutcharavan	2021-04-20
USeries_1371	-4.37565	55.8426	La Digue Island	Grand Anse, Site 11			Sea Level Indicator	Single Coral	Near the base of the outcrop; in situ coral framework composed 30 cm thick interval dominated by encrusting and subassive Faviids sub-massive Favites	Total station or Auto/hand level	3.4	0.2	-2	0	-2			Mean Low Water Springs			U-Series	Equal to	SY-09c	DU15-001-003	Coral	117.6	0.5	117.5	0.45									Dutton et al., 2015 Chutcharavan and Dutton, 2020	Peter Chutcharavan	2021-04-20
USeries_1372	-4.37565	55.8426	La Digue Island	Grand Anse, Site 11			Sea Level Indicator	Single Coral	Shore-parallel section; 70 cm from top of the section massive Goniastrea retiforma?	Total station or Auto/hand level	7.64	0.2	-2	0	-2			Mean Low Water Springs			U-Series	Equal to	SY-12a	DU15-002-001	Coral	123.1	1.4	122.95	1.4									Dutton et al., 2015 Chutcharavan and Dutton, 2020	Peter Chutcharavan	2021-04-20
USeries_1373	-4.37565	55.8426	La Digue Island	Grand Anse, Site 11			Sea Level Indicator	Single Coral	Shore-parallel section; 70 cm from top of the section massive Goniastrea retiforma?	Total station or Auto/hand level	7.64	0.2	-2	0	-2			Mean Low Water Springs			U-Series	Equal to	SY-12b	DU15-002-002	Coral	124.5	0.6	124.29	0.65									Dutton et al., 2015 Chutcharavan and Dutton, 2020	Peter Chutcharavan	2021-04-20
USeries_1374	-4.37565	55.8426	La Digue Island	Grand Anse, Site 11			Sea Level Indicator	Single Coral	Shore-parallel section; 70 cm from top of the section massive Goniastrea retiforma?	Total station or Auto/hand level	7.64	0.2	-2	0	-2			Mean Low Water Springs			U-Series	Equal to	SY-12c	DU15-002-003	Coral	123.6	0.8	123.41	0.82									Dutton et al., 2015 Chutcharavan and Dutton, 2020	Peter Chutcharavan	2021-04-20
USeries_1375	-4.36348	55.8321	La Digue Island	Inland site (La Mere Soupape), Site 4, Outcrop A			Sea Level Indicator	Single Coral	Largest colony in section of Outcrop A; capped by cm-scale crusts of CAR (SY-21); likely very shallow Goniastrea retiformis (?)	Total station or Auto/hand level	6.45	0.2	-2	0	-2			Mean Low Water Springs			U-Series	Equal to	SY-22a	DU15-003-001	Coral	124.5	0.5	124.33	0.54									Dutton et al., 2015 Chutcharavan and Dutton, 2020	Peter Chutcharavan	2021-04-20
USeries_1376	-4.36348	55.8321	La Digue Island	Inland site (La Mere Soupape), Site 4, Outcrop A			Sea Level Indicator	Single Coral	Largest colony in section of Outcrop A; capped by cm-scale crusts of CAR (SY-21); likely very shallow Goniastrea retiformis (?)	Total station or Auto/hand level	6.45	0.2	-2	0	-2			Mean Low Water Springs			U-Series	Equal to	SY-22b	DU15-003-002	Coral	96.1	0.4	95.95	0.38									Dutton et al., 2015 Chutcharavan and Dutton, 2020	Peter Chutcharavan	2021-04-20
USeries_1377	-4.36348	55.8321	La Digue Island	Inland site (La Mere Soupape), Site 4, Outcrop A			Sea Level Indicator	Single Coral	Largest colony in section of Outcrop A; capped by cm-scale crusts of CAR (SY-21); likely very shallow Goniastrea retiformis (?)	Total station or Auto/hand level	6.45	0.2	-2	0	-2			Mean Low Water Springs			U-Series	Equal to	SY-22c	DU15-003-003	Coral	112.4	0.6	112.29	0.58									Dutton et al., 2015 Chutcharavan and Dutton, 2020	Peter Chutcharavan	2021-04-20
USeries_1378	-4.36348	55.8321	La Digue Island	Inland site (La Mere Soupape), Site 4, Outcrop A			Sea Level Indicator	Single Coral	Part of in situ encrusting complex of corals (Montipora & Cyphastrea), that overlies SY-21 (thick CAR) but is also overlain [by] more cm-scale CAR crusts; likely very shallow enc. Cyphastrea	Total station or Auto/hand level	7.02	0.2	-2	0	-2			Mean Low Water Springs			U-Series	Equal to	SY-24a	DU15-004-001	Coral	112.5	0.6	112.31	0.57									Dutton et al., 2015 Chutcharavan and Dutton, 2020	Peter Chutcharavan	2021-04-20
USeries_1379	-4.36348	55.8321	La Digue Island	Inland site (La Mere Soupape), Site 4, Outcrop A			Sea Level Indicator	Single Coral	Part of in situ encrusting complex of corals (Montipora & Cyphastrea), that overlies SY-21 (thick CAR) but is also overlain [by] more cm-scale CAR crusts; likely very shallow enc. Cyphastrea	Total station or Auto/hand level	7.02	0.2	-2	0	-2			Mean Low Water Springs			U-Series	Equal to	SY-24b	DU15-004-002	Coral	126.3	0.6	126.18	0.55									Dutton et al., 2015 Chutcharavan and Dutton, 2020	Peter Chutcharavan	2021-04-20
USeries_1380	-4.36348	55.8321	La Digue Island	Inland site (La Mere Soupape), Site 4, Outcrop A			Sea Level Indicator	Single Coral	Part of in situ encrusting complex of corals (Montipora & Cyphastrea), that overlies SY-21 (thick CAR) but is also overlain [by] more cm-scale CAR crusts; likely very shallow enc. Cyphastrea	Total station or Auto/hand level	7.02	0.2	-2	0	-2			Mean Low Water Springs			U-Series	Equal to	SY-24c	DU15-004-003	Coral	86	0.4	85.89	0.39									Dutton et al., 2015 Chutcharavan and Dutton, 2020	Peter Chutcharavan	2021-04-20
USeries_1381	-4.36348	55.8321	La Digue Island	Inland site (La Mere Soupape), Site 4, Outcrop B			Sea Level Indicator	Single Coral	Largest colony in the section of Outcrop B, capped by 58-cm interval that is dominated by cm-scale crusts of CAR (SY-29), with abundant vermetids and trapped coarse clastic grains; likely very shallow, intertidal Goniastrea retiformis	Total station or Auto/hand level	5.45	0.2	-2	0	-2			Mean Low Water Springs			U-Series	Equal to	SY-27a	DU15-005-001	Coral	127	0.6	126.82	0.55									Dutton et al., 2015 Chutcharavan and Dutton, 2020	Peter Chutcharavan	2021-04-20
USeries_1382	-4.36348	55.8321	La Digue Island	Inland site (La Mere Soupape), Site 4, Outcrop B			Sea Level Indicator	Single Coral	Largest colony in the section of Outcrop B, capped by 58-cm interval that is dominated by cm-scale crusts of CAR (SY-29), with abundant vermetids and trapped coarse clastic grains; likely very shallow, intertidal Goniastrea retiformis	Total station or Auto/hand level	5.45	0.2	-2	0	-2			Mean Low Water Springs			U-Series	Equal to	SY-27b	DU15-005-002	Coral	128.3	0.8	128.14	0.83									Dutton et al., 2015 Chutcharavan and Dutton, 2020	Peter Chutcharavan	2021-04-20
USeries_1383	-4.36348	55.8321	La Digue Island	Inland site (La Mere Soupape), Site 4, Outcrop B			Sea Level Indicator	Single Coral	Largest colony in the section of Outcrop B, capped by 58-cm interval that is dominated by cm-scale crusts of CAR (SY-29), with abundant vermetids and trapped coarse clastic grains; likely very shallow, intertidal Goniastrea retiformis	Total station or Auto/hand level	5.45	0.2	-2	0	-2			Mean Low Water Springs			U-Series	Equal to	SY-27c	DU15-005-003	Coral	127	0.7	126.85	0.66									Dutton et al., 2015 Chutcharavan and Dutton, 2020	Peter Chutcharavan	2021-04-20
USeries_1384	-4.36348	55.8321	La Digue Island	Inland site (La Mere Soupape), Site 4, Outcrop G			Sea Level Indicator	Single Coral	Part of in situ encrusting complex of corals (Cyphastrea, Pavona/Leptastrea, with SY-37), that overlies SY-32 characterized by the thick crusts of fruticose CAR and below that, directly plastering the granite wall, thick cm-scale crusts CAR with large and abundant vermetids; likely very shallow, intertidal pavona/leptastrea (encrusting)	Total station or Auto/hand level	5.64	0.2	-2	0	-2			Mean Low Water Springs			U-Series	Equal to	SY-36a	DU15-006-001	Coral	126.6	1	126.44	0.99									Dutton et al., 2015 Chutcharavan and Dutton, 2020	Peter Chutcharavan	2021-04-20
USeries_1385	-4.36348	55.8321	La Digue Island	Inland site (La Mere Soupape), Site 4, Outcrop G			Sea Level Indicator	Single Coral	Part of in situ encrusting complex of corals (Cyphastrea, Pavona/Leptastrea, with SY-37), that overlies SY-32 characterized by the thick crusts of fruticose CAR and below that, directly plastering the granite wall, thick cm-scale crusts CAR with large and abundant vermetids; likely very shallow, intertidal pavona/leptastrea (encrusting)	Total station or Auto/hand level	5.64	0.2	-2	0	-2			Mean Low Water Springs			U-Series	Equal to	SY-36b	DU15-006-002	Coral	126.6	0.6	126.45	0.56									Dutton et al., 2015 Chutcharavan and Dutton, 2020	Peter Chutcharavan	2021-04-20
USeries_1386	-4.36348	55.8321	La Digue Island	Inland site (La Mere Soupape), Site 4, Outcrop G			Sea Level Indicator	Single Coral	Part of in situ encrusting complex of corals (Cyphastrea, Pavona/Leptastrea, with SY-37), that overlies SY-32 characterized by the thick crusts of fruticose CAR and below that, directly plastering the granite wall, thick cm-scale crusts CAR with large and abundant vermetids; likely very shallow, intertidal pavona/leptastrea (encrusting)	Total station or Auto/hand level	5.64	0.2	-2	0	-2			Mean Low Water Springs			U-Series	Equal to	SY-36c	DU15-006-003	Coral	126.6	0.5	126.48	0.46									Dutton et al., 2015 Chutcharavan and Dutton, 2020	Peter Chutcharavan	2021-04-20
USeries_1387	-4.36348	55.8321	La Digue Island	Inland site (La Mere Soupape), Site 4, Outcrop G			Sea Level Indicator	Single Coral	Part of in situ encrusting complex of corals with SY-36 pavona/leptastrea (encrusting)	Total station or Auto/hand level	5.71	0.2	-2	0	-2			Mean Low Water Springs			U-Series	Equal to	SY-37a	DU15-007-001	Coral	127.5	0.7	127.29	0.7									Dutton et al., 2015 Chutcharavan and Dutton, 2020	Peter Chutcharavan	2021-04-20
USeries_1388	-4.36348	55.8321	La Digue Island	Inland site (La Mere Soupape), Site 4, Outcrop G			Sea Level Indicator	Single Coral	Part of in situ encrusting complex of corals with SY-36 pavona/leptastrea (encrusting)	Total station or Auto/hand level	5.71	0.2	-2	0	-2			Mean Low Water Springs			U-Series	Equal to	SY-37b	DU15-007-002	Coral	126.1	0.8	125.93	0.78									Dutton et al., 2015 Chutcharavan and Dutton, 2020	Peter Chutcharavan	2021-04-20
USeries_1389	-4.36348	55.8321	La Digue Island	Inland site (La Mere Soupape), Site 4, Outcrop G			Sea Level Indicator	Single Coral	Part of in situ encrusting complex of corals with SY-36 pavona/leptastrea (encrusting)	Total station or Auto/hand level	5.71	0.2	-2	0	-2			Mean Low Water Springs			U-Series	Equal to	SY-37c	DU15-007-003	Coral	126.8	0.7	126.61	0.73									Dutton et al., 2015 Chutcharavan and Dutton, 2020	Peter Chutcharavan	2021-04-20
USeries_1390	-4.36348	55.8321	La Digue Island	Inland site (La Mere Soupape), Site 4, Outcrop G			Sea Level Indicator	Single Coral	Near the top of Outcrop G, close to thick cm-scale crusts of CAR that drape down from where they are attached to the granite wall; likely very shallow, intertidal sub-massive Favia?	Total station or Auto/hand level	6.11	0.2	-2	0	-2			Mean Low Water Springs			U-Series	Equal to	SY-41a	DU15-008-001	Coral	128.7	2	128.55	1.97									Dutton et al., 2015 Chutcharavan and Dutton, 2020	Peter Chutcharavan	2021-04-20
USeries_1391	-4.36348	55.8321	La Digue Island	Inland site (La Mere Soupape), Site 4, Outcrop G			Sea Level Indicator	Single Coral	Near the top of Outcrop G, close to thick cm-scale crusts of CAR that drape down from where they are attached to the granite wall; likely very shallow, intertidal sub-massive Favia?	Total station or Auto/hand level	6.11	0.2	-2	0	-2			Mean Low Water Springs			U-Series	Equal to	SY-41b	DU15-008-002	Coral	122.3	0.6	122.14	0.62									Dutton et al., 2015 Chutcharavan and Dutton, 2020	Peter Chutcharavan	2021-04-20
USeries_1392	-4.36348	55.8321	La Digue Island	Inland site (La Mere Soupape), Site 4, Outcrop G			Sea Level Indicator	Single Coral	Near the top of Outcrop G, close to thick cm-scale crusts of CAR that drape down from where they are attached to the granite wall; likely very shallow, intertidal sub-massive Favia?	Total station or Auto/hand level	6.11	0.2	-2	0	-2			Mean Low Water Springs			U-Series	Equal to	SY-41c	DU15-008-003	Coral	125.6	0.5	125.45	0.5									Dutton et al., 2015 Chutcharavan and Dutton, 2020	Peter Chutcharavan	2021-04-20
USeries_1393	-4.36978	55.8268	La Digue Island	Anse Source D'Argent, Site 7			Sea Level Indicator	Single Coral	likely very shallow (intertidal), stratigraphically just below well-developed interlayered, thick CAR with vermetid gastropods Goniastrea retiformis	Total station or Auto/hand level	7.46	0.2	-2	0	-2			Mean Low Water Springs			U-Series	Equal to	SY-52a	DU15-009-001	Coral	123	0.6	122.79	0.62									Dutton et al., 2015 Chutcharavan and Dutton, 2020	Peter Chutcharavan	2021-04-20
USeries_1394	-4.36978	55.8268	La Digue Island	Anse Source D'Argent, Site 7			Sea Level Indicator	Single Coral	likely very shallow (intertidal), stratigraphically just below well-developed interlayered, thick CAR with vermetid gastropods Goniastrea retiformis	Total station or Auto/hand level	7.46	0.2	-2	0	-2			Mean Low Water Springs			U-Series	Equal to	SY-52b	DU15-009-002	Coral	122.5	0.6	122.38	0.62									Dutton et al., 2015 Chutcharavan and Dutton, 2020	Peter Chutcharavan	2021-04-20
USeries_1395	-4.36978	55.8268	La Digue Island	Anse Source D'Argent, Site 7			Sea Level Indicator	Single Coral	likely very shallow (intertidal), stratigraphically just below well-developed interlayered, thick CAR with vermetid gastropods Goniastrea retiformis	Total station or Auto/hand level	7.46	0.2	-2	0	-2			Mean Low Water Springs			U-Series	Equal to	SY-52c	DU15-009-003	Coral	119.8	0.8	119.6	0.82									Dutton et al., 2015 Chutcharavan and Dutton, 2020	Peter Chutcharavan	2021-04-20
USeries_1396	-4.36978	55.8268	La Digue Island	Anse Source D'Argent, Site 7			Sea Level Indicator	Single Coral	Close to rubble deposit at the top of the profile 3 but likely in situ, likely very shallow (intertidal), stratigraphically 10 cm below SY-52 A.humilus gp?	Total station or Auto/hand level	7.36	0.2	-2	0	-2			Mean Low Water Springs			U-Series	Equal to	SY-53a	DU15-010-001	Coral	124.9	1.1	124.79	1.11									Dutton et al., 2015 Chutcharavan and Dutton, 2020	Peter Chutcharavan	2021-04-20
USeries_1397	-4.36978	55.8268	La Digue Island	Anse Source D'Argent, Site 7			Sea Level Indicator	Single Coral	Close to rubble deposit at the top of the profile 3 but likely in situ, likely very shallow (intertidal), stratigraphically 10 cm below SY-52 A.humilus gp?	Total station or Auto/hand level	7.36	0.2	-2	0	-2			Mean Low Water Springs			U-Series	Equal to	SY-53aa	DU15-010-002	Coral	123	0.5	122.85	0.55									Dutton et al., 2015 Chutcharavan and Dutton, 2020	Peter Chutcharavan	2021-04-20
USeries_1398	-4.36978	55.8268	La Digue Island	Anse Source D'Argent, Site 7			Sea Level Indicator	Single Coral	Close to rubble deposit at the top of the profile 3 but likely in situ, likely very shallow (intertidal), stratigraphically 10 cm below SY-52 A.humilus gp?	Total station or Auto/hand level	7.36	0.2	-2	0	-2			Mean Low Water Springs			U-Series	Equal to	SY-53b	DU15-010-003	Coral	119.2	0.8	119.09	0.82									Dutton et al., 2015 Chutcharavan and Dutton, 2020	Peter Chutcharavan	2021-04-20
USeries_1399	-4.36978	55.8268	La Digue Island	Anse Source D'Argent, Site 7			Sea Level Indicator	Single Coral	Close to rubble deposit at the top of the profile 3 but likely in situ, likely very shallow (intertidal), stratigraphically 10 cm below SY-52 A.humilus gp?	Total station or Auto/hand level	7.36	0.2	-2	0	-2			Mean Low Water Springs			U-Series	Equal to	SY-53bb	DU15-010-004	Coral	122.5	0.6	122.39	0.62									Dutton et al., 2015 Chutcharavan and Dutton, 2020	Peter Chutcharavan	2021-04-20
USeries_1400	-4.36978	55.8268	La Digue Island	Anse Source D'Argent, Site 7			Sea Level Indicator	Single Coral	Close to rubble deposit at the top of the profile 3 but likely in situ, likely very shallow (intertidal), stratigraphically 10 cm below SY-52 A.humilus gp?	Total station or Auto/hand level	7.36	0.2	-2	0	-2			Mean Low Water Springs			U-Series	Equal to	SY-53c	DU15-010-005	Coral	115.5	0.9	115.34	0.91									Dutton et al., 2015 Chutcharavan and Dutton, 2020	Peter Chutcharavan	2021-04-20
USeries_1401	-4.36978	55.8268	La Digue Island	Anse Source D'Argent, Site 7			Sea Level Indicator	Single Coral	Close to rubble deposit at the top of the profile 3 but likely in situ, likely very shallow (intertidal), stratigraphically 10 cm below SY-52 A.humilus gp?	Total station or Auto/hand level	7.36	0.2	-2	0	-2			Mean Low Water Springs			U-Series	Equal to	SY-53cc	DU15-010-006	Coral	72.1	0.2	72.05	0.23									Dutton et al., 2015 Chutcharavan and Dutton, 2020	Peter Chutcharavan	2021-04-20
USeries_1402	-4.36978	55.8268	La Digue Island	Anse Source D'Argent, Site 7			Sea Level Indicator	Single Coral	Part of in situ, coralgal framework from the top ~1.5 m of profile 3 that is dominated by massive and submassive Faviids, likely very shallow, intertidal massive Goniastrea retiformis	Total station or Auto/hand level	6.91	0.2	-2	0	-2			Mean Low Water Springs			U-Series	Equal to	SY-56a	DU15-011-001	Coral	169.3	2.6	268.99	2.64									Dutton et al., 2015 Chutcharavan and Dutton, 2020	Peter Chutcharavan	2021-04-20
USeries_1403	-4.36978	55.8268	La Digue Island	Anse Source D'Argent, Site 7			Sea Level Indicator	Single Coral	Part of in situ, coralgal framework from the top ~1.5 m of profile 3 that is dominated by massive and submassive Faviids, likely very shallow, intertidal massive Goniastrea retiformis	Total station or Auto/hand level	6.91	0.2	-2	0	-2			Mean Low Water Springs			U-Series	Equal to	SY-56b	DU15-011-002	Coral	126.6	0.7	126.43	0.66									Dutton et al., 2015 Chutcharavan and Dutton, 2020	Peter Chutcharavan	2021-04-20
USeries_1404	-4.36978	55.8268	La Digue Island	Anse Source D'Argent, Site 7			Sea Level Indicator	Single Coral	Part of in situ, coralgal framework from the top ~1.5 m of profile 3 that is dominated by massive and submassive Faviids, likely very shallow, intertidal massive Goniastrea retiformis	Total station or Auto/hand level	6.91	0.2	-2	0	-2			Mean Low Water Springs			U-Series	Equal to	SY-56c	DU15-011-003	Coral	127.6	0.5	127.4	0.54									Dutton et al., 2015 Chutcharavan and Dutton, 2020	Peter Chutcharavan	2021-04-20
USeries_1405	-4.37308	55.8292	La Digue Island	S. End of Anse Source d'Argent, site 8			Sea Level Indicator	Single Coral	Near base of an in situ, ~50 cm submassive and massive complex of corals, protected cave, outcrop is landward facing, rather than seaward facing as with all other outcrops sub-massive goniastrea retiformis	Total station or Auto/hand level	3.22	0.2	-2	0	-2			Mean Low Water Springs			U-Series	Equal to	SY-63a	DU15-012-001	Coral	127.2	0.5	127.04	0.55									Dutton et al., 2015 Chutcharavan and Dutton, 2020	Peter Chutcharavan	2021-04-20
USeries_1406	-4.37308	55.8292	La Digue Island	S. End of Anse Source d'Argent, site 8			Sea Level Indicator	Single Coral	Near base of an in situ, ~50 cm submassive and massive complex of corals, protected cave, outcrop is landward facing, rather than seaward facing as with all other outcrops sub-massive goniastrea retiformis	Total station or Auto/hand level	3.22	0.2	-2	0	-2			Mean Low Water Springs			U-Series	Equal to	SY-63b	DU15-012-002	Coral	127.2	0.4	126.997	0.43722									Dutton et al., 2015 Chutcharavan and Dutton, 2020	Peter Chutcharavan	2021-04-20
USeries_1407	-4.37308	55.8292	La Digue Island	S. End of Anse Source d'Argent, site 8			Sea Level Indicator	Single Coral	Near base of an in situ, ~50 cm submassive and massive complex of corals, protected cave, outcrop is landward facing, rather than seaward facing as with all other outcrops sub-massive goniastrea retiformis	Total station or Auto/hand level	3.22	0.2	-2	0	-2			Mean Low Water Springs			U-Series	Equal to	SY-63c	DU15-012-003	Coral	127	0.6	126.816	0.584518									Dutton et al., 2015 Chutcharavan and Dutton, 2020	Peter Chutcharavan	2021-04-20
USeries_1408	-4.28453	55.731	Curieuse Island	North end of old turtle pond wall, Site 19			Sea Level Indicator	Single Coral	Interval characterized by thick cm-scale, interlayered CAR between in situ Stylophora colonies, CAR also thickened on branch tips; likely very shallow Stylophora (branching)	Total station or Auto/hand level	5.32	0.2	-2	0	-2			Mean Low Water Springs			U-Series	Equal to	SY-66a	DU15-013-001	Coral	129.9	0.8	129.692	0.806314									Dutton et al., 2015 Chutcharavan and Dutton, 2020	Peter Chutcharavan	2021-04-20
USeries_1409	-4.28453	55.731	Curieuse Island	North end of old turtle pond wall, Site 19			Sea Level Indicator	Single Coral	Interval characterized by thick cm-scale, interlayered CAR between in situ Stylophora colonies, CAR also thickened on branch tips; likely very shallow Stylophora (branching)	Total station or Auto/hand level	5.32	0.2	-2	0	-2			Mean Low Water Springs			U-Series	Equal to	SY-66b	DU15-013-002	Coral	126.5	0.8	126.31	0.77									Dutton et al., 2015 Chutcharavan and Dutton, 2020	Peter Chutcharavan	2021-04-20
USeries_1410	-4.28453	55.731	Curieuse Island	North end of old turtle pond wall, Site 19			Sea Level Indicator	Single Coral	Interval characterized by thick cm-scale, interlayered CAR between in situ Stylophora colonies, CAR also thickened on branch tips; likely very shallow Stylophora (branching)	Total station or Auto/hand level	5.32	0.2	-2	0	-2			Mean Low Water Springs			U-Series	Equal to	SY-66c	DU15-013-003	Coral	128.6	0.8	128.39	0.75									Dutton et al., 2015 Chutcharavan and Dutton, 2020	Peter Chutcharavan	2021-04-20
USeries_1411	-4.28453	55.731	Curieuse Island	North end of old turtle pond wall, Site 19			Sea Level Indicator	Single Coral	Large well developed colony, some interlayered CAR on cm-scale crusts capping part of the top of the corall; likely very shallow Favites	Total station or Auto/hand level	6.06	0.2	-2	0	-2			Mean Low Water Springs			U-Series	Equal to	SY-68a	DU15-014-001	Coral	126.7	0.6	126.53	0.64									Dutton et al., 2015 Chutcharavan and Dutton, 2020	Peter Chutcharavan	2021-04-20
USeries_1412	-4.28453	55.731	Curieuse Island	North end of old turtle pond wall, Site 19			Sea Level Indicator	Single Coral	Large well developed colony, some interlayered CAR on cm-scale crusts capping part of the top of the corall; likely very shallow Favites	Total station or Auto/hand level	6.06	0.2	-2	0	-2			Mean Low Water Springs			U-Series	Equal to	SY-68b	DU15-014-002	Coral	124.9	0.6	124.72	0.64									Dutton et al., 2015 Chutcharavan and Dutton, 2020	Peter Chutcharavan	2021-04-20
USeries_1413	-4.28453	55.731	Curieuse Island	North end of old turtle pond wall, Site 19			Sea Level Indicator	Single Coral	Large well developed colony, some interlayered CAR on cm-scale crusts capping part of the top of the corall; likely very shallow Favites	Total station or Auto/hand level	6.06	0.2	-2	0	-2			Mean Low Water Springs			U-Series	Equal to	SY-68c	DU15-014-003	Coral	125.3	0.6	125.11	0.57									Dutton et al., 2015 Chutcharavan and Dutton, 2020	Peter Chutcharavan	2021-04-20
USeries_1414	-4.28453	55.731	Curieuse Island	North end of old turtle pond wall, Site 19			Sea Level Indicator	Single Coral	Growing off CAR that is attached to granite wall Favites	Total station or Auto/hand level	5.72	0.2	-2	0	-2			Mean Low Water Springs			U-Series	Equal to	SY-69a	DU15-015-001	Coral	127.1	0.5	126.91	0.47									Dutton et al., 2015 Chutcharavan and Dutton, 2020	Peter Chutcharavan	2021-04-20
USeries_1415	-4.28453	55.731	Curieuse Island	North end of old turtle pond wall, Site 19			Sea Level Indicator	Single Coral	Growing off CAR that is attached to granite wall Favites	Total station or Auto/hand level	5.72	0.2	-2	0	-2			Mean Low Water Springs			U-Series	Equal to	SY-69b	DU15-015-002	Coral	125.6	0.6	125.45	0.59									Dutton et al., 2015 Chutcharavan and Dutton, 2020	Peter Chutcharavan	2021-04-20
USeries_1416	-4.28453	55.731	Curieuse Island	North end of old turtle pond wall, Site 19			Sea Level Indicator	Single Coral	Growing off CAR that is attached to granite wall Favites	Total station or Auto/hand level	5.72	0.2	-2	0	-2			Mean Low Water Springs			U-Series	Equal to	SY-69c	DU15-015-003	Coral	126	0.6	125.8	0.63									Dutton et al., 2015 Chutcharavan and Dutton, 2020	Peter Chutcharavan	2021-04-20
USeries_1428	17.7608	-64.6036	St Croix	Tague Reef			Sea Level Indicator	Single Coral	"reef flat and/or backreef setting with sufficient wave action to maintain a state of constant agitation" Acropora palmata	Not reported	-8.5	1	-5	0	-5			Mean Sea Level / General definition			U-Series	Equal to	H3C1-1 (TR3. 1-1) ET311	TO12-005-001	Coral	114.9	0.3	115.08	0.3									Toscano et al., 2012 Chutcharavan and Dutton, 2020	Peter Chutcharavan	2021-04-20
USeries_1429	17.7608	-64.6036	St Croix	Tague Reef			Sea Level Indicator	Single Coral	"reef flat and/or backreef setting with sufficient wave action to maintain a state of constant agitation" Porites asteroides	Not reported	-9.25	1	-5	0	-5			Mean Sea Level / General definition			U-Series	Equal to	H3C1-6 (TR3. 1-6) JT316	TO12-006-001	Coral	124.4	0.3	124.57	0.3									Toscano et al., 2012 Chutcharavan and Dutton, 2020	Peter Chutcharavan	2021-04-20
USeries_1430	17.7608	-64.6036	St Croix	Tague Reef			Sea Level Indicator	Single Coral	"reef flat and/or backreef setting with sufficient wave action to maintain a state of constant agitation" Acropora palmata	Not reported	-9.75	1	-5	0	-5			Mean Sea Level / General definition			U-Series	Equal to	H3C1-9 (TR3. 1-9) FT319	TO12-007-001	Coral	123.2	0.3	123.44	0.3									Toscano et al., 2012 Chutcharavan and Dutton, 2020	Peter Chutcharavan	2021-04-20
USeries_1431	17.7608	-64.6036	St Croix	Tague Reef			Sea Level Indicator	Single Coral	"reef flat and/or backreef setting with sufficient wave action to maintain a state of constant agitation" Porites porites	Not reported	-7.8	1	-5	0	-5			Mean Sea Level / General definition			U-Series	Equal to	H5C1-4 (TR5. 1-4) GT514	TO12-008-001	Coral	125.5	0.3	125.68	0.3									Toscano et al., 2012 Chutcharavan and Dutton, 2020	Peter Chutcharavan	2021-04-20
USeries_1432	17.7608	-64.6036	St Croix	Tague Reef			Sea Level Indicator	Single Coral	"reef flat and/or backreef setting with sufficient wave action to maintain a state of constant agitation" Porites asteroides	Not reported	-12.5	1	-5	0	-5			Mean Sea Level / General definition			U-Series	Equal to	H8C5-4 (TR8. 5-4) AT854	TO12-009-001	Coral	129.2	0.3	129.44	0.3									Toscano et al., 2012 Chutcharavan and Dutton, 2020	Peter Chutcharavan	2021-04-20
USeries_1433	17.7586	-64.7081	St Croix	Long Reef			Sea Level Indicator	Single Coral	"The lack of sufficient MIS 5.5 section in these cores precludes definitive facies interpretations along this transect" Montastraea annularis	Not reported	-5.8	1	-9.7	-1.1	-17			Mean Sea Level / General definition			U-Series	Equal to	H3C1-1 (LR C3) KC311	TO12-010-001	Coral	138.9	0.4	139.23	0.4									Toscano et al., 2012 Chutcharavan and Dutton, 2020	Peter Chutcharavan	2021-04-20
USeries_1450	12.6625	43.3905	Perim Island				Sea Level Indicator	Single Coral	patch-reef lagoonal environment Faviidae	Topographic map and digital elevation models	4	2	-7.6	-0.8	-37			Mean Sea Level / General definition			U-Series	Equal to	PI 01	AL18-016-001	Coral	135.524	0.586	135.53	0.58									Al-Mikhlafi et al., 2018 Chutcharavan and Dutton, 2020	Peter Chutcharavan	2021-04-20
USeries_1451	12.6625	43.3905	Perim Island				Sea Level Indicator	Single Coral	patch-reef lagoonal environment Faviidae	Topographic map and digital elevation models	4	2	-7.6	-0.8	-37			Mean Sea Level / General definition			U-Series	Equal to	PI 02	AL18-017-001	Coral	91.516	0.303	91.52	0.31									Al-Mikhlafi et al., 2018 Chutcharavan and Dutton, 2020	Peter Chutcharavan	2021-04-20
USeries_1452	12.6625	43.3905	Perim Island				Sea Level Indicator	Single Coral	patch-reef lagoonal environment Faviidae	Topographic map and digital elevation models	4	2	-7.6	-0.8	-37			Mean Sea Level / General definition			U-Series	Equal to	PI 03	AL18-018-001	Coral	123.656	0.446	123.67	0.45									Al-Mikhlafi et al., 2018 Chutcharavan and Dutton, 2020	Peter Chutcharavan	2021-04-20
USeries_1479	20.5799	-87.1191	Xcaret	Upper reef tract			Sea Level Indicator	Single Coral	reef crest-colony Acropora palmata	Not reported	4.7	1	-5	0	-5			Mean Sea Level / General definition			U-Series	Equal to	xD4-2a	BL09-003-001	Coral	117	1	117.24	0.54									Blanchon et al., 2009 Chutcharavan and Dutton, 2020	Peter Chutcharavan	2021-04-20
USeries_1480	20.5799	-87.1191	Xcaret	Upper reef tract			Sea Level Indicator	Single Coral	reef crest-colony Acropora palmata	Not reported	4.7	1	-5	0	-5			Mean Sea Level / General definition			U-Series	Equal to	xD4-2b	BL09-003-002	Coral	122.8	1.1	123.09	0.73									Blanchon et al., 2009 Chutcharavan and Dutton, 2020	Peter Chutcharavan	2021-04-20
USeries_1481	20.5799	-87.1191	Xcaret	Upper reef tract			Sea Level Indicator	Single Coral	reef crest-colony Acropora palmata	Not reported	4.7	1	-5	0	-5			Mean Sea Level / General definition			U-Series	Equal to	xD4-2c	BL09-003-003	Coral	127.7	1.1	127.85	0.76									Blanchon et al., 2009 Chutcharavan and Dutton, 2020	Peter Chutcharavan	2021-04-20
USeries_1482	20.5799	-87.1191	Xcaret	Upper reef tract			Sea Level Indicator	Single Coral	reef crest-colony Acropora palmata	Not reported	4	1	-5	0	-5			Mean Sea Level / General definition			U-Series	Equal to	xE2-2a	BL09-004-001	Coral	117.7	1.1	117.87	1.48									Blanchon et al., 2009 Chutcharavan and Dutton, 2020	Peter Chutcharavan	2021-04-20
USeries_1483	20.5799	-87.1191	Xcaret	Upper reef tract			Sea Level Indicator	Single Coral	reef crest-colony Acropora palmata	Not reported	4	1	-5	0	-5			Mean Sea Level / General definition			U-Series	Equal to	xE2-2c	BL09-004-002	Coral	118.4	1	118.59	1.88									Blanchon et al., 2009 Chutcharavan and Dutton, 2020	Peter Chutcharavan	2021-04-20
USeries_1484	20.5799	-87.1191	Xcaret	Upper reef tract			Sea Level Indicator	Single Coral	reef crest-colony Acropora palmata	Not reported	4	1	-5	0	-5			Mean Sea Level / General definition			U-Series	Equal to	xE2-2b	BL09-004-003	Coral	121.9	1.2	122.07	1.76									Blanchon et al., 2009 Chutcharavan and Dutton, 2020	Peter Chutcharavan	2021-04-20
USeries_1485	20.5799	-87.1191	Xcaret	Upper reef tract			Sea Level Indicator	Single Coral	reef crest-colony Acropora palmata	Not reported	4.9	1	-5	0	-5			Mean Sea Level / General definition			U-Series	Equal to	xD4-3a	BL09-005-001	Coral	119.5	1.1	120.96	0.63									Blanchon et al., 2009 Chutcharavan and Dutton, 2020	Peter Chutcharavan	2021-04-20
USeries_1486	20.5799	-87.1191	Xcaret	Upper reef tract			Sea Level Indicator	Single Coral	reef crest-colony Acropora palmata	Not reported	4.9	1	-5	0	-5			Mean Sea Level / General definition			U-Series	Equal to	xD4-3c	BL09-005-002	Coral	123.5	1	123.75	0.63									Blanchon et al., 2009 Chutcharavan and Dutton, 2020	Peter Chutcharavan	2021-04-20
USeries_1487	20.5799	-87.1191	Xcaret	Upper reef tract			Sea Level Indicator	Single Coral	reef crest-colony Acropora palmata	Not reported	4.9	1	-5	0	-5			Mean Sea Level / General definition			U-Series	Equal to	xD4-3b	BL09-005-003	Coral	126.2	1.1	126.27	0.8									Blanchon et al., 2009 Chutcharavan and Dutton, 2020	Peter Chutcharavan	2021-04-20
USeries_1491	20.5799	-87.1191	Xcaret	Lower reef tract			Sea Level Indicator	Single Coral	reef crest-colony Acropora palmata	Not reported	2.2	1	-5	0	-5			Mean Sea Level / General definition			U-Series	Equal to	xA4-2b	BL09-007-001	Coral	132.6	1.6	131.23	0.94									Blanchon et al., 2009 Chutcharavan and Dutton, 2020	Peter Chutcharavan	2021-04-20
USeries_1492	20.5799	-87.1191	Xcaret	Lower reef tract			Sea Level Indicator	Single Coral	reef crest-colony Acropora palmata	Not reported	2.2	1	-5	0	-5			Mean Sea Level / General definition			U-Series	Equal to	xA4-2c	BL09-007-002	Coral	134.3	1.4	134.75	0.88									Blanchon et al., 2009 Chutcharavan and Dutton, 2020	Peter Chutcharavan	2021-04-20
USeries_1493	20.5799	-87.1191	Xcaret	Lower reef tract			Sea Level Indicator	Single Coral	reef crest-colony Acropora palmata	Not reported	2.2	1	-5	0	-5			Mean Sea Level / General definition			U-Series	Equal to	xA4-2a	BL09-007-003	Coral	138.2	1.8	138.48	1									Blanchon et al., 2009 Chutcharavan and Dutton, 2020	Peter Chutcharavan	2021-04-20
USeries_1497	20.5799	-87.1191	Xcaret	Lower reef tract			Sea Level Indicator	Single Coral	reef lagoon - colony Sideraststrea siderea	Not reported	1	1	-10	-1.2	-23			Mean Sea Level / General definition			U-Series	Equal to	xC7-5b	BL09-009-001	Coral	107.7	1	107.91	1.08									Blanchon et al., 2009 Chutcharavan and Dutton, 2020	Peter Chutcharavan	2021-04-20
USeries_1498	20.5799	-87.1191	Xcaret	Lower reef tract			Sea Level Indicator	Single Coral	reef lagoon - colony Sideraststrea siderea	Not reported	1	1	-10	-1.2	-23			Mean Sea Level / General definition			U-Series	Equal to	xC7-5c	BL09-009-002	Coral	110.2	1.2	110.27	1.18									Blanchon et al., 2009 Chutcharavan and Dutton, 2020	Peter Chutcharavan	2021-04-20
USeries_1499	20.5799	-87.1191	Xcaret	Lower reef tract			Sea Level Indicator	Single Coral	reef lagoon - colony Sideraststrea siderea	Not reported	1	1	-10	-1.2	-23			Mean Sea Level / General definition			U-Series	Equal to	xC7-5a	BL09-009-003	Coral	110.7	1	110.87	1.14									Blanchon et al., 2009 Chutcharavan and Dutton, 2020	Peter Chutcharavan	2021-04-20
USeries_1500	20.5799	-87.1191	Xcaret	Lower reef tract			Sea Level Indicator	Single Coral	reef lagoon - colony Sideraststrea siderea	Not reported	1.7	1	-10	-1.2	-23			Mean Sea Level / General definition			U-Series	Equal to	xC7-2a	BL09-010-001	Coral	146	1.7	146.41	0.99									Blanchon et al., 2009 Chutcharavan and Dutton, 2020	Peter Chutcharavan	2021-04-20
USeries_1501	20.5799	-87.1191	Xcaret	Lower reef crest			Sea Level Indicator	Single Coral	reef lagoon - colony Sideraststrea siderea	Not reported	1.7	1	-10	-1.2	-23			Mean Sea Level / General definition			U-Series	Equal to	xC7-2c	BL09-010-002	Coral	149.6	1.4	149.92	0.94									Blanchon et al., 2009 Chutcharavan and Dutton, 2020	Peter Chutcharavan	2021-04-20
USeries_1502	20.5799	-87.1191	Xcaret	Lower reef tract			Sea Level Indicator	Single Coral	reef lagoon - colony Sideraststrea siderea	Not reported	1.7	1	-10	-1.2	-23			Mean Sea Level / General definition			U-Series	Equal to	xC7-2b	BL09-010-003	Coral	158.2	1.7	158.73	1.18									Blanchon et al., 2009 Chutcharavan and Dutton, 2020	Peter Chutcharavan	2021-04-20
USeries_1503	20.5799	-87.1191	Xcaret	Lower reef tract			Sea Level Indicator	Single Coral	reef lagoon - colony Sideraststrea siderea	Not reported	1.7	1	-10	-1.2	-23			Mean Sea Level / General definition			U-Series	Equal to	xC7-2d	BL09-010-004	Coral	137.4	2.4	137.68	2.4									Blanchon et al., 2009 Chutcharavan and Dutton, 2020	Peter Chutcharavan	2021-04-20
USeries_1504	20.5799	-87.1191	Xcaret	Lower reef tract			Sea Level Indicator	Single Coral	reef lagoon - colony Sideraststrea siderea	Not reported	1.7	1	-10	-1.2	-23			Mean Sea Level / General definition			U-Series	Equal to	xC7-2e	BL09-010-005	Coral	137.7	3.4	137.98	3.4									Blanchon et al., 2009 Chutcharavan and Dutton, 2020	Peter Chutcharavan	2021-04-20
USeries_1505	-24.2252	113.397	Cape Cuvier	Reef flat corals (lower terrace) T1 seaward to T6 landward			Sea Level Indicator	Single Coral	lower +4 m reef flat Acropora humilis	Total station or Auto/hand level	3.4	2	-3	0	-7			Mean Low Water Springs			U-Series	Equal to	LCV7e_3c	HE07-012-001	Coral	118.13	0.66	118.46	0.7									Hearty et al., 2007 Chutcharavan and Dutton, 2020	Peter Chutcharavan	2021-04-20
USeries_1506	-24.2252	113.397	Cape Cuvier	Reef flat corals (lower terrace) T1 seaward to T6 landward			Sea Level Indicator	Single Coral	lower +4 m reef flat Acropora humilis	Theodolite and rod	3.4	2	-3	0	-7			Mean Low Water Springs			U-Series	Equal to	LCV7 T1	HE07-013-001	Coral	124.57	0.61	124.93	0.65									Hearty et al., 2007 Chutcharavan and Dutton, 2020	Peter Chutcharavan	2021-04-20
USeries_1507	-24.2252	113.397	Cape Cuvier	Reef flat corals (lower terrace) T1 seaward to T6 landward			Sea Level Indicator	Single Coral	lower +4 m reef flat Acropora humilis	Theodolite and rod	3.4	2	-3	0	-7			Mean Low Water Springs			U-Series	Equal to	LCV7 T3	HE07-014-001	Coral	125.02	0.59	124.93	0.55									Hearty et al., 2007 Chutcharavan and Dutton, 2020	Peter Chutcharavan	2021-04-20
USeries_1508	-24.2252	113.397	Cape Cuvier	lower +4 m reef flat			Sea Level Indicator	Single Coral	lower +4 m reef flat Acropora humilis	Total station or Auto/hand level	3.4	2	-3	0	-7			Mean Low Water Springs			U-Series	Equal to	LCV 6.5	HE07-016-001	Coral	130.93	0.59	131.29	0.61									Hearty et al., 2007 Chutcharavan and Dutton, 2020	Peter Chutcharavan	2021-04-20
USeries_1509	-24.2252	113.397	Cape Cuvier	lower +4 m reef flat			Sea Level Indicator	Single Coral	lower +4 m reef flat Acropora humilis	Total station or Auto/hand level	3.4	2	-3	0	-7			Mean Low Water Springs			U-Series	Equal to	LCV3e_2b	HE07-017-001	Coral	133.06	0.86	133.44	0.86									Hearty et al., 2007 Chutcharavan and Dutton, 2020	Peter Chutcharavan	2021-04-20
USeries_1510	-24.2252	113.397	Cape Cuvier	lower +4 m reef flat			Sea Level Indicator	Single Coral	lower +4 m reef flat Acropora humilis	Total station or Auto/hand level	3.4	2	-3	0	-7			Mean Low Water Springs			U-Series	Equal to	LCV3e_2a	HE07-018-001	Coral	137.53	0.88	137.89	0.92									Hearty et al., 2007 Chutcharavan and Dutton, 2020	Peter Chutcharavan	2021-04-20
USeries_1519	-29.3	114.917	Leander Point	Perth Basin			Sea Level Indicator	Single Coral	Not Reported Faviidae	Not reported	1.2	0.1	-7.6	-0.8	-37			Mean Low Water Springs			U-Series	Equal to	LP-93-3 s	ST95-001-001	Coral	121.8	0.8	122.23	0.3									Stirling et al., 1995 Chutcharavan and Dutton, 2020	Peter Chutcharavan	2021-04-20
USeries_1520	-29.3	114.917	Leander Point	Perth Basin			Sea Level Indicator	Single Coral	Not Reported Faviidae	Not reported	1.3	0.1	-7.6	-0.8	-37			Mean Low Water Springs			U-Series	Equal to	LP-93-6 s	ST95-002-001	Coral	123.3	0.9	123.63	0.55									Stirling et al., 1995 Chutcharavan and Dutton, 2020	Peter Chutcharavan	2021-04-20
USeries_1521	-29.3	114.917	Leander Point	Perth Basin			Sea Level Indicator	Single Coral	Not Reported Faviidae	Not reported	1.7	0.1	-7.6	-0.8	-37			Mean Low Water Springs			U-Series	Equal to	LP-93-10 s	ST95-003-001	Coral	123.4	0.9	123.68	0.52									Stirling et al., 1995 Chutcharavan and Dutton, 2020	Peter Chutcharavan	2021-04-20
USeries_1522	-29.3	114.917	Leander Point	Perth Basin			Sea Level Indicator	Single Coral	Not Reported Faviidae	Not reported	0.88	1	-7.6	-0.8	-37			Mean Low Water Springs			U-Series	Equal to	LP-93-4 s	ST95-004-001	Coral	123.7	0.8	124.01	0.35									Stirling et al., 1995 Chutcharavan and Dutton, 2020	Peter Chutcharavan	2021-04-20
USeries_1523	-29.3	114.917	Leander Point	Perth Basin			Sea Level Indicator	Single Coral	Not Reported Faviidae	Not reported	0.2	0.1	-7.6	-0.8	-37			Mean Low Water Springs			U-Series	Equal to	LP-93-5 s	ST95-005-001	Coral	123.8	0.9	124.1	0.55									Stirling et al., 1995 Chutcharavan and Dutton, 2020	Peter Chutcharavan	2021-04-20
USeries_1524	-29.3	114.917	Leander Point	Perth Basin			Sea Level Indicator	Single Coral	Not Reported Faviidae	Not reported	1.6	0.1	-7.6	-0.8	-37			Mean Low Water Springs			U-Series	Equal to	LP-91-1 a w	ST95-006-001	Coral	124.1	1.5	124.46	1.29									Stirling et al., 1995 Chutcharavan and Dutton, 2020	Peter Chutcharavan	2021-04-20
USeries_1525	-29.3	114.917	Leander Point	Perth Basin			Sea Level Indicator	Single Coral	Not Reported Faviidae	Not reported	1.6	0.1	-7.6	-0.8	-37			Mean Low Water Springs			U-Series	Equal to	LP-91-1 bs	ST95-006-002	Coral	126.6	0.9	126.9	0.39									Stirling et al., 1995 Chutcharavan and Dutton, 2020	Peter Chutcharavan	2021-04-20
USeries_1527	-29.3	114.917	Leander Point	Perth Basin			Sea Level Indicator	Single Coral	Not Reported Faviidae	Not reported	0.6	0.1	-7.6	-0.8	-37			Mean Low Water Springs			U-Series	Equal to	LP-93-9 s	ST95-007-001	Coral	124.2	0.8	124.5	0.31									Stirling et al., 1995 Chutcharavan and Dutton, 2020	Peter Chutcharavan	2021-04-20
USeries_1528	-29.3	114.917	Leander Point	Perth Basin			Sea Level Indicator	Single Coral	Not Reported Faviidae	Not reported	0.2	0.1	-7.6	-0.8	-37			Mean Low Water Springs			U-Series	Equal to	LP-93-8 s	ST95-008-001	Coral	124.2	0.9	124.51	0.55									Stirling et al., 1995 Chutcharavan and Dutton, 2020	Peter Chutcharavan	2021-04-20
USeries_1529	-29.3	114.917	Leander Point	Perth Basin			Sea Level Indicator	Single Coral	Not Reported Faviidae	Not reported	0.57	1	-7.6	-0.8	-37			Mean Low Water Springs			U-Series	Equal to	LP-91-2 bS	ST95-009-001	Coral	126.1	0.8	126.37	0.34									Stirling et al., 1995 Chutcharavan and Dutton, 2020	Peter Chutcharavan	2021-04-20
USeries_1531	-29.3	114.917	Leander Point	Perth Basin			Sea Level Indicator	Single Coral	Not Reported Acropora	Not reported	1.41	1	-2.4	0	-18			Mean Low Water Springs			U-Series	Equal to	LP-93-7 w	ST95-010-001	Coral	121	0.8	121.25	0.29									Stirling et al., 1995 Chutcharavan and Dutton, 2020	Peter Chutcharavan	2021-04-20
USeries_1532	-32.0153	115.514	Rottnest Island	Perth Basin			Sea Level Indicator	Single Coral	Not Reported Faviidae	Not reported	1.3	0.1	-7.6	-0.8	-37			Mean Low Water Springs			U-Series	Equal to	RN-FB-6 w	ST95-011-001	Coral	125.4	0.9	125.7	0.32									Stirling et al., 1995 Chutcharavan and Dutton, 2020	Peter Chutcharavan	2021-04-20
USeries_1533	-32.0153	115.514	Rottnest Island	Perth Basin			Sea Level Indicator	Single Coral	Not Reported Faviidae	Not reported	-0.1	0.1	-7.6	-0.8	-37			Mean Low Water Springs			U-Series	Equal to	RN-FB-3 w	ST95-012-001	Coral	125.5	0.8	125.79	0.28									Stirling et al., 1995 Chutcharavan and Dutton, 2020	Peter Chutcharavan	2021-04-20
USeries_1534	-32.0153	115.514	Rottnest Island	Perth Basin			Sea Level Indicator	Single Coral	Not Reported Faviidae	Not reported	1.2	0.1	-7.6	-0.8	-37			Mean Low Water Springs			U-Series	Equal to	RN-FB-4 w	ST95-013-001	Coral	126.2	0.8	126.48	0.28									Stirling et al., 1995 Chutcharavan and Dutton, 2020	Peter Chutcharavan	2021-04-20
USeries_1535	-32.0153	115.514	Rottnest Island	Perth Basin			Sea Level Indicator	Single Coral	Not Reported Faviidae	Not reported	1.9	0.1	-7.6	-0.8	-37			Mean Low Water Springs			U-Series	Equal to	RN-FB-7 b w	ST95-014-001	Coral	126	0.8	126.48	0.28									Stirling et al., 1995 Chutcharavan and Dutton, 2020	Peter Chutcharavan	2021-04-20
USeries_1536	-32.0153	115.514	Rottnest Island	Perth Basin			Sea Level Indicator	Single Coral	Not Reported Faviidae	Not reported	1.9	0.1	-7.6	-0.8	-37			Mean Low Water Springs			U-Series	Equal to	RN-FB-7 a w	ST95-014-002	Coral	127.3	1	127.6	0.6									Stirling et al., 1995 Chutcharavan and Dutton, 2020	Peter Chutcharavan	2021-04-20
USeries_1538	-32.0153	115.514	Rottnest Island	Perth Basin			Sea Level Indicator	Single Coral	Not Reported Faviidae	Not reported	-0.19	1	-7.6	-0.8	-37			Mean Low Water Springs			U-Series	Equal to	RN-FB-1 w	ST95-015-001	Coral	126.6	0.8	127.03	0.32									Stirling et al., 1995 Chutcharavan and Dutton, 2020	Peter Chutcharavan	2021-04-20
USeries_1539	-32.0153	115.514	Rottnest Island	Perth Basin			Sea Level Indicator	Single Coral	Not Reported Faviidae	Not reported	-0.29	1	-7.6	-0.8	-37			Mean Low Water Springs			U-Series	Equal to	RN-FB-2 w	ST95-016-001	Coral	127.3	0.9	127.75	0.57									Stirling et al., 1995 Chutcharavan and Dutton, 2020	Peter Chutcharavan	2021-04-20
USeries_1540	-32.0153	115.514	Rottnest Island	Perth Basin			Sea Level Indicator	Single Coral	Not Reported Acropora	Not reported	1.4	1	-2.4	0	-18			Mean Low Water Springs			U-Series	Equal to	RN-FB-5 b w	ST95-017-001	Coral	109	0.8	109.36	0.5									Stirling et al., 1995 Chutcharavan and Dutton, 2020	Peter Chutcharavan	2021-04-20
USeries_1541	-32.0153	115.514	Rottnest Island	Perth Basin			Sea Level Indicator	Single Coral	Not Reported Acropora	Not reported	1.4	1	-2.4	0	-18			Mean Low Water Springs			U-Series	Equal to	RN-FB-5 a w	ST95-017-002	Coral	116.6	0.8	116.96	0.37									Stirling et al., 1995 Chutcharavan and Dutton, 2020	Peter Chutcharavan	2021-04-20
USeries_1542	-32.0153	115.514	Rottnest Island	Perth Basin			Sea Level Indicator	Single Coral	Not Reported Acropora	Not reported	1.4	1	-2.4	0	-18			Mean Low Water Springs			U-Series	Equal to	RN-FB-5 c w	ST95-017-003	Coral	124.9	0.9	125.28	0.56									Stirling et al., 1995 Chutcharavan and Dutton, 2020	Peter Chutcharavan	2021-04-20
USeries_1543	-28.87	114.64	Burney Point	Perth Basin			Sea Level Indicator	Single Coral	Not Reported Faviidae	Not reported	2.6	0.1	-7.6	-0.8	-37			Mean Low Water Springs			U-Series	Equal to	GR-93-3	ST98-001-001	Coral	121.7	0.5	122.06	0.57									Stirling et al., 1998 Chutcharavan and Dutton, 2020	Peter Chutcharavan	2021-04-20
USeries_1544	-28.87	114.64	Burney Point	Perth Basin			Sea Level Indicator	Single Coral	Not Reported Faviidae	Not reported	1.3	0.1	-7.6	-0.8	-37			Mean Low Water Springs			U-Series	Equal to	GR-93-1	ST98-002-001	Coral	122.2	0.4	122.57	0.51									Stirling et al., 1998 Chutcharavan and Dutton, 2020	Peter Chutcharavan	2021-04-20
USeries_1545	-28.87	114.64	Burney Point	Perth Basin			Sea Level Indicator	Single Coral	Not Reported Faviidae	Not reported	2.6	0.1	-7.6	-0.8	-37			Mean Low Water Springs			U-Series	Equal to	GR-93-4	ST98-003-001	Coral	123	0.5	123.23	0.55									Stirling et al., 1998 Chutcharavan and Dutton, 2020	Peter Chutcharavan	2021-04-20
USeries_1546	-28.87	114.64	Burney Point	Perth Basin			Sea Level Indicator	Single Coral	Not Reported Faviidae	Not reported	2.7	0.1	-7.6	-0.8	-37			Mean Low Water Springs			U-Series	Equal to	GR-93-2	ST98-004-001	Coral	123.5	0.5	123.91	0.55									Stirling et al., 1998 Chutcharavan and Dutton, 2020	Peter Chutcharavan	2021-04-20
USeries_1547	-24.2252	113.397	Cape Cuvier	Perth Basin			Sea Level Indicator	Single Coral	Not Reported Faviidae	Not reported	8.01	1	-7.6	-0.8	-37			Mean Low Water Springs			U-Series	Equal to	CC-KS-15	ST98-005-001	Coral	126.2	0.5	126.46	0.58									Stirling et al., 1998 Chutcharavan and Dutton, 2020	Peter Chutcharavan	2021-04-20
USeries_1548	-21.9127	113.978	Tantabiddi Bay	Canarvon Basin (Cape Range); drillcore			Sea Level Indicator	Single Coral	Not Reported Porites	Not reported	-7.87	1	-4	0	-66			Mean Low Water Springs			U-Series	Equal to	CR-TB-D1	ST98-007-001	Coral	134.6	0.5	134.84	0.42									Stirling et al., 1998 Chutcharavan and Dutton, 2020	Peter Chutcharavan	2021-04-20
USeries_1549	-21.806	114.129	Vlaming Head	Canarvon Basin (Cape Range); drillcore			Sea Level Indicator	Single Coral	Not Reported Faviidae	Not reported	0.7	0.1	-7.6	-0.8	-37			Mean Low Water Springs			U-Series	Equal to	CR-VH-D4	ST98-008-001	Coral	124.9	0.4	125.35	0.38									Stirling et al., 1998 Chutcharavan and Dutton, 2020	Peter Chutcharavan	2021-04-20
USeries_1550	-21.806	114.129	Vlaming Head	Canarvon Basin (Cape Range); drillcore			Sea Level Indicator	Single Coral	Not Reported Faviidae	Not reported	-2.3	0.1	-7.6	-0.8	-37			Mean Low Water Springs			U-Series	Equal to	CR-VH-D3	ST98-009-001	Coral	127.8	0.5	128.27	0.56									Stirling et al., 1998 Chutcharavan and Dutton, 2020	Peter Chutcharavan	2021-04-20
USeries_1551	-21.806	114.129	Vlaming Head	Canarvon Basin (Cape Range); drillcore			Sea Level Indicator	Single Coral	Not Reported Faviidae	Not reported	-1.2	0.1	-7.6	-0.8	-37			Mean Low Water Springs			U-Series	Equal to	CR-VH-D1	ST98-010-001	Coral	128.9	0.6	129.17	0.64									Stirling et al., 1998 Chutcharavan and Dutton, 2020	Peter Chutcharavan	2021-04-20
USeries_1552	-21.806	114.129	Vlaming Head	Canarvon Basin (Cape Range); drillcore			Sea Level Indicator	Single Coral	Not Reported Faviidae	Not reported	0.7	0.1	-7.6	-0.8	-37			Mean Low Water Springs			U-Series	Equal to	CR-VH-D2	ST98-011-001	Coral	140.3	0.6	140.55	0.68									Stirling et al., 1998 Chutcharavan and Dutton, 2020	Peter Chutcharavan	2021-04-20
USeries_1553	-21.9667	113.933	Mangrove Bay	Canarvon Basin (Cape Range)			Sea Level Indicator	Single Coral	Not Reported Faviidae	Not reported	-0.1	0.1	-7.6	-0.8	-37			Mean Low Water Springs			U-Series	Equal to	CR-MB-12	ST98-012-001	Coral	116.1	0.3	116.33	0.3									Stirling et al., 1998 Chutcharavan and Dutton, 2020	Peter Chutcharavan	2021-04-20
USeries_1554	-21.9667	113.933	Mangrove Bay	Canarvon Basin (Cape Range)			Sea Level Indicator	Single Coral	Not Reported Faviidae	Not reported	0	0.1	-7.6	-0.8	-37			Mean Low Water Springs			U-Series	Equal to	CR-MB-7	ST98-013-001	Coral	118.2	0.5	118.38	0.53									Stirling et al., 1998 Chutcharavan and Dutton, 2020	Peter Chutcharavan	2021-04-20
USeries_1555	-21.9667	113.933	Mangrove Bay	Canarvon Basin (Cape Range)			Sea Level Indicator	Single Coral	Not Reported Faviidae	Not reported	0.9	0.1	-7.6	-0.8	-37			Mean Low Water Springs			U-Series	Equal to	CR-MB-3	ST98-014-001	Coral	119.2	0.5	119.4	0.53									Stirling et al., 1998 Chutcharavan and Dutton, 2020	Peter Chutcharavan	2021-04-20
USeries_1556	-21.9667	113.933	Mangrove Bay	Canarvon Basin (Cape Range)			Sea Level Indicator	Single Coral	Not Reported Faviidae	Not reported	1.3	0.1	-7.6	-0.8	-37			Mean Low Water Springs			U-Series	Equal to	CR-MB-6	ST98-015-001	Coral	125.4	0.5	125.59	0.56									Stirling et al., 1998 Chutcharavan and Dutton, 2020	Peter Chutcharavan	2021-04-20
USeries_1557	-21.9667	113.933	Mangrove Bay	Canarvon Basin (Cape Range)			Sea Level Indicator	Single Coral	Not Reported Faviidae	Not reported	0.45	1	-7.6	-0.8	-37			Mean Low Water Springs			U-Series	Equal to	CR-MB-1	ST98-016-001	Coral	149.9	0.8	150.31	0.71									Stirling et al., 1998 Chutcharavan and Dutton, 2020	Peter Chutcharavan	2021-04-20
USeries_1559	-21.9667	113.933	Mangrove Bay	Canarvon Basin (Cape Range)			Sea Level Indicator	Single Coral	Not Reported Porites	Not reported	-0.48	1	-4	0	-66			Mean Low Water Springs			U-Series	Equal to	CR-MB-10	ST98-018-001	Coral	136.4	1.7	136.66	1.73									Stirling et al., 1998 Chutcharavan and Dutton, 2020	Peter Chutcharavan	2021-04-20
USeries_1560	-21.9667	113.933	Mangrove Bay	Canarvon Basin (Cape Range)			Sea Level Indicator	Single Coral	Not Reported Porites	Not reported	-0.44	1	-4	0	-66			Mean Low Water Springs			U-Series	Equal to	CR-MB-8	ST98-019-001	Coral	139.1	1.3	139.4	1.27									Stirling et al., 1998 Chutcharavan and Dutton, 2020	Peter Chutcharavan	2021-04-20
USeries_1561	-22.0577	114.109	Mowbowra Creek	Canarvon Basin (Cape Range)			Sea Level Indicator	Single Coral	Not Reported Faviidae	Not reported	1.9	0.1	-4	0	-66			Mean Low Water Springs			U-Series	Equal to	CR-MC-6a	ST98-021-001	Coral	132.2	0.5	132.51	0.48									Stirling et al., 1998 Chutcharavan and Dutton, 2020	Peter Chutcharavan	2021-04-20
USeries_1562	-22.0577	114.109	Mowbowra Creek	Canarvon Basin (Cape Range)			Sea Level Indicator	Single Coral	Not Reported Faviidae	Not reported	1.9	0.1	-4	0	-66			Mean Low Water Springs			U-Series	Equal to	CR-MC-6b	ST98-021-002	Coral	132.3	0.7	132.61	0.68									Stirling et al., 1998 Chutcharavan and Dutton, 2020	Peter Chutcharavan	2021-04-20
USeries_1563	-22.0577	114.109	Mowbowra Creek	Canarvon Basin (Cape Range)			Sea Level Indicator	Single Coral	Not Reported Faviidae	Not reported	1.5	0.1	-4	0	-66			Mean Low Water Springs			U-Series	Equal to	CR-MC-5	ST98-022-001	Coral	136.6	0.5	136.96	0.6									Stirling et al., 1998 Chutcharavan and Dutton, 2020	Peter Chutcharavan	2021-04-20
USeries_1564	-21.9127	113.978	Tantabiddi Bay	Canarvon Basin (Cape Range)			Sea Level Indicator	Single Coral	Not Reported Faviidae	Not reported	0.74	1	-4	0	-66			Mean Low Water Springs			U-Series	Equal to	CR-TB-5	ST98-023-001	Coral	120.3	1.3	120.6	1.32									Stirling et al., 1998 Chutcharavan and Dutton, 2020	Peter Chutcharavan	2021-04-20
USeries_1565	-21.9127	113.978	Tantabiddi Bay	Canarvon Basin (Cape Range)			Sea Level Indicator	Single Coral	Not Reported Faviidae	Not reported	0.7	0.1	-4	0	-66			Mean Low Water Springs			U-Series	Equal to	CR-TB-9	ST98-024-001	Coral	124.3	0.4	124.61	0.31									Stirling et al., 1998 Chutcharavan and Dutton, 2020	Peter Chutcharavan	2021-04-20
USeries_1566	-21.806	114.129	Vlaming Head	Canarvon Basin (Cape Range)			Sea Level Indicator	Single Coral	Not Reported Faviidae	Not reported	1.21	1	-4	0	-66			Mean Low Water Springs			U-Series	Equal to	CR-VH-26	ST98-025-001	Coral	115	0.4	115.39	0.3									Stirling et al., 1998 Chutcharavan and Dutton, 2020	Peter Chutcharavan	2021-04-20
USeries_1567	-21.806	114.129	Vlaming Head	Canarvon Basin (Cape Range)			Sea Level Indicator	Single Coral	Not Reported Faviidae	Not reported	0.4	0.1	-4	0	-66			Mean Low Water Springs			U-Series	Equal to	CR-VH-22a	ST98-026-001	Coral	124.8	0.6	125.26	0.53									Stirling et al., 1998 Chutcharavan and Dutton, 2020	Peter Chutcharavan	2021-04-20
USeries_1568	-21.806	114.129	Vlaming Head	Canarvon Basin (Cape Range)			Sea Level Indicator	Single Coral	Not Reported Faviidae	Not reported	0.4	0.1	-4	0	-66			Mean Low Water Springs			U-Series	Equal to	CR-VH-22b	ST98-026-002	Coral	125.4	0.6	125.67	0.55									Stirling et al., 1998 Chutcharavan and Dutton, 2020	Peter Chutcharavan	2021-04-20
USeries_1569	-21.806	114.129	Vlaming Head	Canarvon Basin (Cape Range)			Sea Level Indicator	Single Coral	Not Reported Faviidae	Not reported	2.4	0.1	-4	0	-66			Mean Low Water Springs			U-Series	Equal to	CR-VH-28	ST98-027-001	Coral	126.5	0.5	126.76	0.57									Stirling et al., 1998 Chutcharavan and Dutton, 2020	Peter Chutcharavan	2021-04-20
USeries_1570	-21.806	114.129	Vlaming Head	Canarvon Basin (Cape Range)			Sea Level Indicator	Single Coral	Not Reported Faviidae	Not reported	2.5	0.1	-4	0	-66			Mean Low Water Springs			U-Series	Equal to	CR-VH-12	ST98-028-001	Coral	127.2	0.4	127.51	0.34									Stirling et al., 1998 Chutcharavan and Dutton, 2020	Peter Chutcharavan	2021-04-20
USeries_1571	-21.806	114.129	Vlaming Head	Canarvon Basin (Cape Range)			Sea Level Indicator	Single Coral	Not Reported Faviidae	Not reported	2.6	0.1	-4	0	-66			Mean Low Water Springs			U-Series	Equal to	CR-VH-7	ST98-029-001	Coral	128.5	0.5	128.76	0.57									Stirling et al., 1998 Chutcharavan and Dutton, 2020	Peter Chutcharavan	2021-04-20
USeries_1572	-21.806	114.129	Vlaming Head	Canarvon Basin (Cape Range)			Sea Level Indicator	Single Coral	Not Reported Faviidae	Not reported	0.6	0.1	-4	0	-66			Mean Low Water Springs			U-Series	Equal to	CR-VH-4a	ST98-030-001	Coral	138.7	0.4	139.06	0.36									Stirling et al., 1998 Chutcharavan and Dutton, 2020	Peter Chutcharavan	2021-04-20
USeries_1573	-21.806	114.129	Vlaming Head	Canarvon Basin (Cape Range)			Sea Level Indicator	Single Coral	Not Reported Faviidae	Not reported	0.6	0.1	-4	0	-66			Mean Low Water Springs			U-Series	Equal to	CR-VH-4b	ST98-030-002	Coral	138.8	0.6	139.11	0.66									Stirling et al., 1998 Chutcharavan and Dutton, 2020	Peter Chutcharavan	2021-04-20
USeries_1574	-22.3307	113.807	Yardie Creek South	Canarvon Basin (Cape Range)			Sea Level Indicator	Single Coral	Not Reported Faviidae	Not reported	1.4	0.1	-4	0	-66			Mean Low Water Springs			U-Series	Equal to	CR-YCS-6	ST98-031-001	Coral	121.6	0.5	122.01	0.51									Stirling et al., 1998 Chutcharavan and Dutton, 2020	Peter Chutcharavan	2021-04-20
USeries_1575	-22.3307	113.807	Yardie Creek South	Canarvon Basin (Cape Range)			Sea Level Indicator	Single Coral	Not Reported Faviidae	Not reported	1.8	0.1	-4	0	-66			Mean Low Water Springs			U-Series	Equal to	CR-YCS-1	ST98-032-001	Coral	124.7	0.4	125.157	0.336495									Stirling et al., 1998 Chutcharavan and Dutton, 2020	Peter Chutcharavan	2021-04-20
USeries_1576	-22.3307	113.807	Yardie Creek South	Canarvon Basin (Cape Range)			Sea Level Indicator	Single Coral	Not Reported Faviidae	Not reported	0.2	0.1	-4	0	-66			Mean Low Water Springs			U-Series	Equal to	CR-YCS-5 a	ST98-033-001	Coral	128.6	0.4	129.006	0.419377									Stirling et al., 1998 Chutcharavan and Dutton, 2020	Peter Chutcharavan	2021-04-20
USeries_1579	-22.324	113.813	Yardie Creek	Canarvon Basin (Cape Range)			Sea Level Indicator	Single Coral	Not Reported Faviidae	Not reported	2.2	0.1	-4	0	-66			Mean Low Water Springs			U-Series	Equal to	CR-YC-3	ST98-035-001	Coral	121.1	0.6	121.538	0.567656									Stirling et al., 1998 Chutcharavan and Dutton, 2020	Peter Chutcharavan	2021-04-20
USeries_1580	-22.324	113.813	Yardie Creek	Canarvon Basin (Cape Range)			Sea Level Indicator	Single Coral	Not Reported Faviidae	Not reported	1.94	1	-4	0	-66			Mean Low Water Springs			U-Series	Equal to	CR-YC-12	ST98-036-001	Coral	121.1	0.7	121.54	0.78									Stirling et al., 1998 Chutcharavan and Dutton, 2020	Peter Chutcharavan	2021-04-20
USeries_1581	-22.324	113.813	Yardie Creek	Canarvon Basin (Cape Range)			Sea Level Indicator	Single Coral	Not Reported Faviidae	Not reported	1.9	0.1	-4	0	-66			Mean Low Water Springs			U-Series	Equal to	CR-YC-9	ST98-037-001	Coral	126.8	0.3	127.12	0.32									Stirling et al., 1998 Chutcharavan and Dutton, 2020	Peter Chutcharavan	2021-04-20
USeries_1582	-22.324	113.813	Yardie Creek	Canarvon Basin (Cape Range)			Sea Level Indicator	Single Coral	Not Reported Faviidae	Not reported	1.9	0.1	-4	0	-66			Mean Low Water Springs			U-Series	Equal to	CR-YC-13	ST98-038-001	Coral	128.9	1.1	129.27	1.12									Stirling et al., 1998 Chutcharavan and Dutton, 2020	Peter Chutcharavan	2021-04-20
USeries_1583	-22.324	113.813	Yardie Creek	Canarvon Basin (Cape Range)			Sea Level Indicator	Single Coral	Not Reported Porites	Not reported	2.8	0.1	-4	0	-66			Mean Low Water Springs			U-Series	Equal to	CR-YC-7	ST98-039-001	Coral	119.8	0.4	120.03	0.47									Stirling et al., 1998 Chutcharavan and Dutton, 2020	Peter Chutcharavan	2021-04-20
USeries_1584	-24.2252	113.397	Cape Cuvier	Perth Basin			Sea Level Indicator	Single Coral	Not Reported Faviidae	Not reported	5.97	1	-4	0	-66			Mean Low Water Springs			U-Series	Equal to	CC-KS-14	ST98-040-001	Coral	128.5	0.7	128.84	0.83									Stirling et al., 1998 Chutcharavan and Dutton, 2020	Peter Chutcharavan	2021-04-20
USeries_1585	-34.2405	115.032	Foul Bay	Margaret River			Sea Level Indicator	Single Coral	solitary head corals, mainly Goniastrea sp. together with lenses containing abundant gastropods (Turbo sp.), opercula, and rare bivalves Faviidae	Not reported	2	1.5	-5	0	-46			Mean Sea Level / General definition			U-Series	Equal to	MFU-1a 3 Fav	MC08-001-001	Coral	107.4	0.4	107.7	0.43									McCulloch and Mortimer, 2008 Chutcharavan and Dutton, 2020	Peter Chutcharavan	2021-04-20
USeries_1586	-34.2405	115.032	Foul Bay	Margaret River			Sea Level Indicator	Single Coral	solitary head corals, mainly Goniastrea sp. together with lenses containing abundant gastropods (Turbo sp.), opercula, and rare bivalves Faviidae	Not reported	2	1.5	-5	0	-46			Mean Sea Level / General definition			U-Series	Equal to	FB2 Fav	MC08-002-001	Coral	110.4	0.5	110.72	0.49									McCulloch and Mortimer, 2008 Chutcharavan and Dutton, 2020	Peter Chutcharavan	2021-04-20
USeries_1587	-34.2405	115.032	Foul Bay	Margaret River			Sea Level Indicator	Single Coral	solitary head corals, mainly Goniastrea sp. together with lenses containing abundant gastropods (Turbo sp.), opercula, and rare bivalves Faviidae	Not reported	2	1.5	-5	0	-46			Mean Sea Level / General definition			U-Series	Equal to	MFU-1a Fav	MC08-003-001	Coral	119.5	1	119.89	1.04									McCulloch and Mortimer, 2008 Chutcharavan and Dutton, 2020	Peter Chutcharavan	2021-04-20
USeries_1588	-34.2405	115.032	Foul Bay	Margaret River			Sea Level Indicator	Single Coral	solitary head corals, mainly Goniastrea sp. together with lenses containing abundant gastropods (Turbo sp.), opercula, and rare bivalves Faviidae	Not reported	2.5	0.1	-5	0	-46			Mean Sea Level / General definition			U-Series	Equal to	FB04-4a Fav	MC08-004-001	Coral	125	1.5	124.96	1.5									McCulloch and Mortimer, 2008 Chutcharavan and Dutton, 2020	Peter Chutcharavan	2021-04-20
USeries_1589	-34.2405	115.032	Foul Bay	Margaret River			Sea Level Indicator	Single Coral	solitary head corals, mainly Goniastrea sp. together with lenses containing abundant gastropods (Turbo sp.), opercula, and rare bivalves Faviidae	Not reported	0.5	0.1	-5	0	-46			Mean Sea Level / General definition			U-Series	Equal to	FB04-6d Fav	MC08-005-001	Coral	125.1	1.3	125.41	1.35									McCulloch and Mortimer, 2008 Chutcharavan and Dutton, 2020	Peter Chutcharavan	2021-04-20
USeries_1590	-34.2405	115.032	Foul Bay	Margaret River			Sea Level Indicator	Single Coral	solitary head corals, mainly Goniastrea sp. together with lenses containing abundant gastropods (Turbo sp.), opercula, and rare bivalves Faviidae	Not reported	2.8	0.1	-5	0	-46			Mean Sea Level / General definition			U-Series	Equal to	FB04-3a Fav	MC08-006-001	Coral	126.9	0.9	127.23	0.9									McCulloch and Mortimer, 2008 Chutcharavan and Dutton, 2020	Peter Chutcharavan	2021-04-20
USeries_1591	-34.2405	115.032	Foul Bay	Margaret River			Sea Level Indicator	Single Coral	solitary head corals, mainly Goniastrea sp. together with lenses containing abundant gastropods (Turbo sp.), opercula, and rare bivalves Faviidae	Not reported	2	0.1	-5	0	-46			Mean Sea Level / General definition			U-Series	Equal to	FB1-1 Fav	MC08-007-001	Coral	127.4	0.7	127.71	0.7									McCulloch and Mortimer, 2008 Chutcharavan and Dutton, 2020	Peter Chutcharavan	2021-04-20
USeries_1592	-34.2405	115.032	Foul Bay	Margaret River			Sea Level Indicator	Single Coral	solitary head corals, mainly Goniastrea sp. together with lenses containing abundant gastropods (Turbo sp.), opercula, and rare bivalves Faviidae	Not reported	2	0.1	-5	0	-46			Mean Sea Level / General definition			U-Series	Equal to	FB1-2 Fav	MC08-008-001	Coral	127.5	0.5	127.82	0.45									McCulloch and Mortimer, 2008 Chutcharavan and Dutton, 2020	Peter Chutcharavan	2021-04-20
USeries_1593	-34.2405	115.032	Foul Bay	Margaret River			Sea Level Indicator	Single Coral	solitary head corals, mainly Goniastrea sp. together with lenses containing abundant gastropods (Turbo sp.), opercula, and rare bivalves Faviidae	Not reported	2.8	0.1	-5	0	-46			Mean Sea Level / General definition			U-Series	Equal to	FB04-2a Fav	MC08-009-001	Coral	127.7	1.5	128	1.58									McCulloch and Mortimer, 2008 Chutcharavan and Dutton, 2020	Peter Chutcharavan	2021-04-20
USeries_1594	-34.2405	115.032	Foul Bay	Margaret River			Sea Level Indicator	Single Coral	solitary head corals, mainly Goniastrea sp. together with lenses containing abundant gastropods (Turbo sp.), opercula, and rare bivalves Faviidae	Not reported	2	0.1	-5	0	-46			Mean Sea Level / General definition			U-Series	Equal to	MFB2 Fav	MC08-010-001	Coral	128	0.6	128.35	0.57									McCulloch and Mortimer, 2008 Chutcharavan and Dutton, 2020	Peter Chutcharavan	2021-04-20
USeries_1595	-34.2405	115.032	Foul Bay	Margaret River			Sea Level Indicator	Single Coral	solitary head corals, mainly Goniastrea sp. together with lenses containing abundant gastropods (Turbo sp.), opercula, and rare bivalves Faviidae	Not reported	2	0.1	-5	0	-46			Mean Sea Level / General definition			U-Series	Equal to	MFB2r Fav	MC08-010-002	Coral	131.9	0.8	132.25	0.9									McCulloch and Mortimer, 2008 Chutcharavan and Dutton, 2020	Peter Chutcharavan	2021-04-20
USeries_1596	-34.2405	115.032	Foul Bay	Margaret River			Sea Level Indicator	Single Coral	solitary head corals, mainly Goniastrea sp. together with lenses containing abundant gastropods (Turbo sp.), opercula, and rare bivalves Faviidae	Not reported	2	0.1	-5	0	-46			Mean Sea Level / General definition			U-Series	Equal to	FB3 Fav	MC08-011-001	Coral	128.4	0.5	128.76	0.53									McCulloch and Mortimer, 2008 Chutcharavan and Dutton, 2020	Peter Chutcharavan	2021-04-20
USeries_1601	-28.7167	113.783	Houtman Abrolhos Islands	Rat Is.			Sea Level Indicator	Single Coral	coral framestone; upward shallowing sequence indicating intertidal or shallow subtidal environment Faviidae	Not reported	1.8	1	-2	0	-2			Mean Sea Level / General definition			U-Series	Equal to	(9) RC-1	ZH93-001-001	Coral	124	2	125.05	1.91									Zhu et al., 1993 Chutcharavan and Dutton, 2020	Peter Chutcharavan	2021-04-20
USeries_1602	-28.7167	113.783	Houtman Abrolhos Islands	Rat Is.			Sea Level Indicator	Single Coral	coral framestone; upward shallowing sequence indicating intertidal or shallow subtidal environment Faviidae (Platygyra)	Not reported	-4.3	1	-2	0	-2			Mean Sea Level / General definition			U-Series	Equal to	(10) RC-2	ZH93-002-001	Coral	134.3	1.3	135.335	1.38069									Zhu et al., 1993 Chutcharavan and Dutton, 2020	Peter Chutcharavan	2021-04-20
USeries_1603	-28.4333	113.717	Houtman Abrolhos Islands	E. Wallabi Is			Sea Level Indicator	Single Coral	coral framestone; upward shallowing sequence indicating intertidal or shallow subtidal environment Acropora	Not reported	1	1	-2	0	-2			Mean Sea Level / General definition			U-Series	Equal to	(2) 4.9.9.89	ZH93-004-001	Coral	115.6	0.9	116.316	0.880576									Zhu et al., 1993 Chutcharavan and Dutton, 2020	Peter Chutcharavan	2021-04-20
USeries_1604	-28.9869	113.962	Houtman Abrolhos Islands	Jon Jim Is			Sea Level Indicator	Single Coral	coral framestone; upward shallowing sequence indicating intertidal or shallow subtidal environment Acropora(?)	Not reported	1	1	-2	0	-2			Mean Sea Level / General definition			U-Series	Equal to	(5) LS1 2.2.90.1	ZH93-005-001	Coral	120.3	1	121.13	1.05									Zhu et al., 1993 Chutcharavan and Dutton, 2020	Peter Chutcharavan	2021-04-20
USeries_1605	-28.8985	113.899	Houtman Abrolhos Islands	Murray Is.			Sea Level Indicator	Single Coral	coral framestone; upward shallowing sequence indicating intertidal or shallow subtidal environment Acropora	Not reported	1.2	1	-2	0	-2			Mean Sea Level / General definition			U-Series	Equal to	(6) LS7 4.2.90#1	ZH93-006-001	Coral	128.7	1.7	129.748	1.63446									Zhu et al., 1993 Chutcharavan and Dutton, 2020	Peter Chutcharavan	2021-04-20
USeries_1606	-28.8985	113.899	Houtman Abrolhos Islands	Murray Is.			Sea Level Indicator	Single Coral	coral framestone; upward shallowing sequence indicating intertidal or shallow subtidal environment Acropora	Not reported	1.2	1	-2	0	-2			Mean Sea Level / General definition			U-Series	Equal to	(6) LS7 4.2.90#2	ZH93-006-002	Coral	129.1	2.3	130.19	2.26									Zhu et al., 1993 Chutcharavan and Dutton, 2020	Peter Chutcharavan	2021-04-20
USeries_1607	-28.4325	113.737	Houtman Abrolhos Islands	Turtle Bay			Sea Level Indicator	Single Coral	coral framestone; upward shallowing sequence indicating intertidal or shallow subtidal environment Acropora	Not reported	3	1	-2	0	-2			Mean Sea Level / General definition			U-Series	Equal to	(3) 1.10.9.89	ZH93-007-001	Coral	132.9	1	134.06	1									Zhu et al., 1993 Chutcharavan and Dutton, 2020	Peter Chutcharavan	2021-04-20
USeries_1608	-28.8864	113.859	Houtman Abrolhos Islands	4 Isl.			Sea Level Indicator	Single Coral	coral framestone; upward shallowing sequence indicating intertidal or shallow subtidal environment Acropora	Not reported	0.3	1	-2	0	-2			Mean Sea Level / General definition			U-Series	Equal to	(7) LS2 14.2.90.1	ZH93-008-001	Coral	141.2	1.2	142.323	1.17995									Zhu et al., 1993 Chutcharavan and Dutton, 2020	Peter Chutcharavan	2021-04-20
USeries_1609	-28.4457	113.729	Houtman Abrolhos Islands	Mangrove Is.			Sea Level Indicator	Single Coral	coral framestone; upward shallowing sequence indicating intertidal or shallow subtidal environment Faviidae (Goniastrea cf retiformis)	Not reported	0.6	1	-2	0	-2			Mean Sea Level / General definition			U-Series	Equal to	(4) 16.9.89.1	ZH93-009-001	Coral	132.8	0.9	133.72	1.01									Zhu et al., 1993 Chutcharavan and Dutton, 2020	Peter Chutcharavan	2021-04-20
USeries_1611	-28.4325	113.737	Houtman Abrolhos Islands	Turtle Bay, E. Wallabi Isl			Sea Level Indicator	Single Coral	reef framestone, drill core Acropora	Not reported	3.3	1	-2.4	0	-18			Mean Sea Level / General definition			U-Series	Equal to	TBC5 #2	EI96-001-001	Coral	124	2	125.45	2.23									Eisenhauer et al., 1996 Chutcharavan and Dutton, 2020	Peter Chutcharavan	2021-04-20
USeries_1612	-28.4325	113.737	Houtman Abrolhos Islands	Turtle Bay, E. Wallabi Isl			Sea Level Indicator	Single Coral	reef framestone, drill core Acropora	Not reported	3.3	1	-2.4	0	-18			Mean Sea Level / General definition			U-Series	Equal to	TBC5	EI96-001-002	Coral	124	2.7	125.58	3.06746									Eisenhauer et al., 1996 Chutcharavan and Dutton, 2020	Peter Chutcharavan	2021-04-20
USeries_1613	-28.4325	113.737	Houtman Abrolhos Islands	Turtle Bay, E. Wallabi Isl			Sea Level Indicator	Single Coral	reef framestone, drill core Acropora	Not reported	3.3	1	-2.4	0	-18			Mean Sea Level / General definition			U-Series	Equal to	TBC4	EI96-002-001	Coral	124	1.7	125.501	1.54746									Eisenhauer et al., 1996 Chutcharavan and Dutton, 2020	Peter Chutcharavan	2021-04-20
USeries_1614	-28.4325	113.737	Houtman Abrolhos Islands	Turtle Bay, E. Wallabi Isl			Sea Level Indicator	Single Coral	reef framestone, drill core Acropora	Not reported	1	1	-2.4	0	-18			Mean Sea Level / General definition			U-Series	Equal to	TBC6	EI96-003-001	Coral	126.9	1.7	128.504	1.31222									Eisenhauer et al., 1996 Chutcharavan and Dutton, 2020	Peter Chutcharavan	2021-04-20
USeries_1615	-28.4325	113.737	Houtman Abrolhos Islands	Turtle Bay, E. Wallabi Isl			Sea Level Indicator	Single Coral	reef framestone, drill core Acropora	Not reported	-1.7	1	-2.4	0	-18			Mean Sea Level / General definition			U-Series	Equal to	TBC8	EI96-004-001	Coral	129.3	1.2	130.926	1.38517									Eisenhauer et al., 1996 Chutcharavan and Dutton, 2020	Peter Chutcharavan	2021-04-20
USeries_1616	-28.4325	113.737	Houtman Abrolhos Islands	Turtle Bay, E. Wallabi Isl			Sea Level Indicator	Single Coral	reef framestone, drill core Acropora	Not reported	-0.6	1	-2.4	0	-18			Mean Sea Level / General definition			U-Series	Equal to	TBC7	EI96-005-001	Coral	130.2	2.2	131.836	2.35982									Eisenhauer et al., 1996 Chutcharavan and Dutton, 2020	Peter Chutcharavan	2021-04-20
USeries_1617	-28.4325	113.737	Houtman Abrolhos Islands	Turtle Bay, E. Wallabi Isl			Sea Level Indicator	Single Coral	reef framestone, drill core Acropora	Not reported	-3.3	1	-2.4	0	-18			Mean Sea Level / General definition			U-Series	Equal to	TBC9	EI96-006-001	Coral	132.5	1.8	134.257	1.8607									Eisenhauer et al., 1996 Chutcharavan and Dutton, 2020	Peter Chutcharavan	2021-04-20
USeries_1618	-28.4325	113.737	Houtman Abrolhos Islands	Turtle Bay, E. Wallabi Isl			Sea Level Indicator	Single Coral	reef framestone, drill core Acropora	Not reported	-6	1	-2.4	0	-18			Mean Sea Level / General definition			U-Series	Equal to	TBC13	EI96-007-001	Coral	140	3	141.884	1.77819									Eisenhauer et al., 1996 Chutcharavan and Dutton, 2020	Peter Chutcharavan	2021-04-20
USeries_1619	-28.4325	113.737	Houtman Abrolhos Islands	Turtle Bay, E. Wallabi Isl			Sea Level Indicator	Single Coral	reef framestone, drill core Acropora	Not reported	-13.1	1	-2.4	0	-18			Mean Sea Level / General definition			U-Series	Equal to	TBC20	EI96-008-001	Coral	140	3	142.088	1.08623									Eisenhauer et al., 1996 Chutcharavan and Dutton, 2020	Peter Chutcharavan	2021-04-20
USeries_1633	-26.346	113.299	Shark Bay	Crayfish Bay			Sea Level Indicator	Single Coral	Not Reported Acropora	Not reported	1	0.1	-2.4	0	-18			Mean Sea Level / General definition			U-Series	Equal to	LS1-92-1	SI96-001-001	Coral			129.39	0.35									Stirling, 1996 Chutcharavan and Dutton, 2020	Peter Chutcharavan	2021-04-20
USeries_1634	-26.1606	113.216	Shark Bay	South Passage			Sea Level Indicator	Single Coral	Bibra FM Faviid	Not reported	1.7	0.1	-7.6	-0.8	-37			Mean Sea Level / General definition			U-Series	Equal to	LS3-92-1b	SI96-002-001	Coral			128.989	0.311458									Stirling, 1996 Chutcharavan and Dutton, 2020	Peter Chutcharavan	2021-04-20
USeries_1635	-25.95	113.133	Shark Bay	South Passage			Sea Level Indicator	Single Coral	Bibra FM Faviid	Not reported	1.7	0.1	-7.6	-0.8	-37			Mean Sea Level / General definition			U-Series	Equal to	LS3-92-1a	SI96-002-002	Coral			129.04	0.33									Stirling, 1996 Chutcharavan and Dutton, 2020	Peter Chutcharavan	2021-04-20
USeries_1636	-26.1606	113.216	Shark Bay	South Passage			Sea Level Indicator	Single Coral	Bibra FM Acropora	Not reported	2.75	1	-2.4	0	-18			Mean Sea Level / General definition			U-Series	Equal to	LS3-92-3	SI96-003-001	Coral			125.89	0.3									Stirling, 1996 Chutcharavan and Dutton, 2020	Peter Chutcharavan	2021-04-20
USeries_1637	-26.1606	113.216	Shark Bay	South Passage			Sea Level Indicator	Single Coral	Dampier FM Goniastrea	Not reported	1.2	0.1	-5	0	-46			Mean Sea Level / General definition			U-Series	Equal to	LS7-92-1	SI96-004-001	Coral			126.9	0.3									Stirling, 1996 Chutcharavan and Dutton, 2020	Peter Chutcharavan	2021-04-20
USeries_1638	-26.1606	113.216	Shark Bay	South Passage			Sea Level Indicator	Single Coral	Dampier FM Goniastrea	Not reported	2	1	-7.6	-0.8	-37			Mean Sea Level / General definition			U-Series	Equal to	LS3-92-2a	SI96-005-001	Coral			127	0.58									Stirling, 1996 Chutcharavan and Dutton, 2020	Peter Chutcharavan	2021-04-20
USeries_1639	-26.1606	113.216	Shark Bay	South Passage			Sea Level Indicator	Single Coral	Dampier FM Goniastrea	Not reported	2	1	-7.6	-0.8	-37			Mean Sea Level / General definition			U-Series	Equal to	LS3-92-2b	SI96-005-002	Coral			129.53	0.57									Stirling, 1996 Chutcharavan and Dutton, 2020	Peter Chutcharavan	2021-04-20
USeries_1640	-26.1606	113.216	Shark Bay	South Passage			Sea Level Indicator	Single Coral	Bibra FM Platygyra	Not reported	1.5	0.1	-5	0	-42			Mean Sea Level / General definition			U-Series	Equal to	LS6-92-1	SI96-006-001	Coral			124.92	0.38									Stirling, 1996 Chutcharavan and Dutton, 2020	Peter Chutcharavan	2021-04-20
USeries_1641	-25.95	113.133	Shark Bay	Tetrodon Loop			Sea Level Indicator	Single Coral	Dampier FM Oulophyllia crispa	Not reported	1	0.1	-7	-1.5	-49.3			Mean Sea Level / General definition			U-Series	Equal to	LS1-92-2	SI96-007-001	Coral			126.18	0.89									Stirling, 1996 Chutcharavan and Dutton, 2020	Peter Chutcharavan	2021-04-20
USeries_1642	-25.95	113.133	Shark Bay	Tetrodon Loop			Sea Level Indicator	Single Coral	Dampier FM Platygyra	Not reported	1.1	0.1	-5	0	-42			Mean Sea Level / General definition			U-Series	Equal to	LS4-92-3	SI96-008-001	Coral			125.48	0.55									Stirling, 1996 Chutcharavan and Dutton, 2020	Peter Chutcharavan	2021-04-20
USeries_1647	-24.2252	113.397	Cape Cuvier	Sea cliff corals (lower terrace)			Sea Level Indicator	Single Coral	sea cliff Acropora humilis	Theodolite and rod	2.1	0.1	-3	0	-7			Mean Low Water Springs			U-Series	Equal to	LCC1m_C	OE08-008-001	Coral	128.3	2.85	128.67	3.04									O'Leary et al., 2008 Chutcharavan and Dutton, 2020	Peter Chutcharavan	2021-04-20
USeries_1648	-24.2252	113.397	Cape Cuvier	Sea cliff corals (lower terrace)			Sea Level Indicator	Single Coral	sea cliff Acropora humilis	Theodolite and rod	1.5	0.1	-3	0	-7			Mean Low Water Springs			U-Series	Equal to	LCC1i_C	OE08-009-001	Coral	128.3	1.35	128.7	1.25									O'Leary et al., 2008 Chutcharavan and Dutton, 2020	Peter Chutcharavan	2021-04-20
USeries_1649	-24.2252	113.397	Cape Cuvier	Sea cliff corals (lower terrace)			Sea Level Indicator	Single Coral	sea cliff Acropora humilis	Theodolite and rod	3.6	0.1	-3	0	-7			Mean Low Water Springs			U-Series	Equal to	LCCt_C	OE08-010-001	Coral	128.9	0.69	129.29	0.66									O'Leary et al., 2008 Chutcharavan and Dutton, 2020	Peter Chutcharavan	2021-04-20
USeries_1650	-24.2252	113.397	Cape Cuvier	Sea cliff corals (lower terrace)			Sea Level Indicator	Single Coral	sea cliff Acropora humilis	Theodolite and rod	2.5	0.1	-3	0	-7			Mean Low Water Springs			U-Series	Equal to	LCC1n_C	OE08-011-001	Coral	129	1.5	129.5	1.54									O'Leary et al., 2008 Chutcharavan and Dutton, 2020	Peter Chutcharavan	2021-04-20
USeries_1651	-24.2252	113.397	Cape Cuvier	Reef flat corals (lower terrace) T1 seaward to T6 landward			Sea Level Indicator	Single Coral	reef flat Acropora humilis	Theodolite and rod	6.1	0.1	-3	0	-7			Mean Low Water Springs			U-Series	Equal to	LCV7 T5	OE08-012-001	Coral	129.18	0.73	129.55	0.66									O'Leary et al., 2008 Chutcharavan and Dutton, 2020	Peter Chutcharavan	2021-04-20
USeries_1652	-24.2252	113.397	Cape Cuvier	Sea cliff corals (lower terrace)			Sea Level Indicator	Single Coral	sea cliff Acropora humilis	Theodolite and rod	1.9	0.1	-3	0	-7			Mean Low Water Springs			U-Series	Equal to	LCCk_C	OE08-014-001	Coral	130	1.45	130.32	1.54									O'Leary et al., 2008 Chutcharavan and Dutton, 2020	Peter Chutcharavan	2021-04-20
USeries_1655	-24.2252	113.397	Cape Cuvier	Sea cliff corals (lower terrace)			Sea Level Indicator	Single Coral	sea cliff Acropora humilis	Theodolite and rod	1.3	0.1	-3	0	-7			Mean Low Water Springs			U-Series	Equal to	LCCg_C	OE08-019-001	Coral	132.4	1.55	132.76	1.63									O'Leary et al., 2008 Chutcharavan and Dutton, 2020	Peter Chutcharavan	2021-04-20
USeries_1663	-32.0153	115.514	Rottnest Island	NA			Sea Level Indicator	Single Coral	Not Reported Faviidae	Not reported	1.9	0.1	-7.6	-0.8	-37			Mean Low Water Springs			U-Series	Equal to	RN-FB-7 d	ST95-014-004	Coral	126.2	1	126.6	0.23									Stirling et al., 2001 Chutcharavan and Dutton, 2020	Peter Chutcharavan	2021-04-20
USeries_1763	12.235	-69.0225	Kust Van Hato	Hato unit			Sea Level Indicator	Single Coral	The Lower Terrace is composed of two reef units, Hato (upper) and Cortalein (lower). The contact between these two units is often seen in a topographic break in coastal exposures, where a ledge in the Cortalein unit is apparent. Thus, from a geomorphic point of view, the interglacial coral reef record on Curaçao differs from those in other areas, both uplifting coasts and tectonically stable coas…	Metered tape or rod	8	1	-5	0	-5			Mean Sea Level / General definition			U-Series	Equal to	Cur-13-d	SC78-001-002	Coral	124.9	0.8	125.711	0.848133									Muhs et al., 2012 Chutcharavan and Dutton, 2020	Peter Chutcharavan	2021-04-20
USeries_1764	12.1763	-68.8754	Boca Santu Pretu?	Hato unit			Sea Level Indicator	Single Coral	The Lower Terrace is composed of two reef units, Hato (upper) and Cortalein (lower). The contact between these two units is often seen in a topographic break in coastal exposures, where a ledge in the Cortalein unit is apparent. Thus, from a geomorphic point of view, the interglacial coral reef record on Curaçao differs from those in other areas, both uplifting coasts and tectonically stable coas…	Metered tape or rod	7	1	-7.3	-0.6	-23.4			Mean Sea Level / General definition			U-Series	Equal to	Cur-22-d	SC78-002-002	Coral	118	1.2	118.701	1.20348									Muhs et al., 2012 Chutcharavan and Dutton, 2020	Peter Chutcharavan	2021-04-20
USeries_1765	12.3874	-69.1433	Un Boca	Hato unit			Sea Level Indicator	Single Coral	The Lower Terrace is composed of two reef units, Hato (upper) and Cortalein (lower). The contact between these two units is often seen in a topographic break in coastal exposures, where a ledge in the Cortalein unit is apparent. Thus, from a geomorphic point of view, the interglacial coral reef record on Curaçao differs from those in other areas, both uplifting coasts and tectonically stable coas…	Metered tape or rod	7.5	1	-5	0	-5			Mean Sea Level / General definition			U-Series	Equal to	Cur-33-d	SC78-005-002	Coral	118.1	0.8	118.818	0.817155									Muhs et al., 2012 Chutcharavan and Dutton, 2020	Peter Chutcharavan	2021-04-20
USeries_1766	12.3784	-69.1324	Boca Mansalina	Lower Terrace, Hato unit			Sea Level Indicator	Single Coral	The Lower Terrace is composed of two reef units, Hato (upper) and Cortalein (lower). The contact between these two units is often seen in a topographic break in coastal exposures, where a ledge in the Cortalein unit is apparent. Thus, from a geomorphic point of view, the interglacial coral reef record on Curaçao differs from those in other areas, both uplifting coasts and tectonically stable coas…	Metered tape or rod	6.5	0.9433	-5	0	-5			Mean Sea Level / General definition			U-Series	Equal to	Cur-Dat-4	MU12-001-001	Coral	125.7	0.7	126.458	0.659014									Muhs et al., 2012 Chutcharavan and Dutton, 2020	Peter Chutcharavan	2021-04-20
USeries_1767	12.3784	-69.1324	Boca Mansalina	Lower Terrace, Hato unit			Sea Level Indicator	Single Coral	The Lower Terrace is composed of two reef units, Hato (upper) and Cortalein (lower). The contact between these two units is often seen in a topographic break in coastal exposures, where a ledge in the Cortalein unit is apparent. Thus, from a geomorphic point of view, the interglacial coral reef record on Curaçao differs from those in other areas, both uplifting coasts and tectonically stable coas…	Metered tape or rod	6.5	0.9433	-5	0	-5			Mean Sea Level / General definition			U-Series	Equal to	Cur-Dat-4 dup	MU12-001-002	Coral	126	0.8	126.771	0.827811									Muhs et al., 2012 Chutcharavan and Dutton, 2020	Peter Chutcharavan	2021-04-20
USeries_1768	12.3391	-69.1536	Knipbai	Lower Terrace, Hato unit			Sea Level Indicator	Single Coral	The Lower Terrace is composed of two reef units, Hato (upper) and Cortalein (lower). The contact between these two units is often seen in a topographic break in coastal exposures, where a ledge in the Cortalein unit is apparent. Thus, from a geomorphic point of view, the interglacial coral reef record on Curaçao differs from those in other areas, both uplifting coasts and tectonically stable coas…	Metered tape or rod	3	1.2806	-5	0	-5			Mean Sea Level / General definition			U-Series	Equal to	Cur-Dat-5	MU12-002-001	Coral	123.3	0.6	124.028	0.568235									Muhs et al., 2012 Chutcharavan and Dutton, 2020	Peter Chutcharavan	2021-04-20
USeries_1769	12.3391	-69.1536	Knipbai	Lower Terrace, Hato unit			Sea Level Indicator	Single Coral	The Lower Terrace is composed of two reef units, Hato (upper) and Cortalein (lower). The contact between these two units is often seen in a topographic break in coastal exposures, where a ledge in the Cortalein unit is apparent. Thus, from a geomorphic point of view, the interglacial coral reef record on Curaçao differs from those in other areas, both uplifting coasts and tectonically stable coas…	Metered tape or rod	3	1.2806	-5	0	-5			Mean Sea Level / General definition			U-Series	Equal to	Cur-Dat-5-P	MU12-003-001	Coral	126.2	0.7	127.03	0.672732									Muhs et al., 2012 Chutcharavan and Dutton, 2020	Peter Chutcharavan	2021-04-20
USeries_1770	12.2356	-69.1044	Punta Halvedag	Lower Terrace, Hato unit			Sea Level Indicator	Single Coral	The Lower Terrace is composed of two reef units, Hato (upper) and Cortalein (lower). The contact between these two units is often seen in a topographic break in coastal exposures, where a ledge in the Cortalein unit is apparent. Thus, from a geomorphic point of view, the interglacial coral reef record on Curaçao differs from those in other areas, both uplifting coasts and tectonically stable coas…	Metered tape or rod	5	0.9433	-5	0	-5			Mean Sea Level / General definition			U-Series	Equal to	Cur-Dat-16	MU12-004-001	Coral	124.1	0.7	124.841	0.746166									Muhs et al., 2012 Chutcharavan and Dutton, 2020	Peter Chutcharavan	2021-04-20
USeries_18	24.9185	-80.6349	Key Largo Formation	Mile marker 82			Sea Level Indicator	Single Coral	Not Reported Siderastrea sp.	Not reported	0.77	1	-3	-3	-10			Mean High Tide (MHT)			U-Series	Equal to	132 E1	FR00-007-001	Coral	137.5	41.25	137.92	1.09									Fruitjier et al., 2000 Chutcharavan and Dutton, 2020	Peter Chutcharavan	2021-04-20
USeries_19	24.9185	-80.6349	Key Largo Formation	Mile marker 82			Sea Level Indicator	Single Coral	Not Reported Siderastrea sp.	Not reported	0.77	1	-3	-3	-10			Mean High Tide (MHT)			U-Series	Equal to	132 E2	FR00-005-001	Coral	135.4	40.62	135.71	0.4									Fruitjier et al., 2000 Chutcharavan and Dutton, 2020	Peter Chutcharavan	2021-04-20
USeries_20	25.1089	-80.423	Key Largo Formation	Mile marker 101			Sea Level Indicator	Single Coral	Not Reported Siderastrea sp.	Not reported	0.67	1	-3	-3	-10			Mean High Tide (MHT)			U-Series	Equal to	184C a	FR00-006-001	Coral	135.9	40.77	136.31	0.97									Fruitjier et al., 2000 Chutcharavan and Dutton, 2020	Peter Chutcharavan	2021-04-20
USeries_2086	13.135	-59.6323	Univ. West Indies (UWI) Transect	originally reported as Clermont Nose transect			Sea Level Indicator	Single Coral	reef crest; rh 3 (Speed and Cheng 2004 [GSA Bulletin]) Acropora palmata	Not reported	58	3	-5	0	-5			Mean Sea Level / General definition			U-Series	Equal to	AFM-20 (A)	ED87-008-003	Coral	130.2	0.7	131.2	0.67	164.2	2.1							Gallup et al., 1994 Chutcharavan and Dutton, 2020	Peter Chutcharavan	2021-04-20
USeries_2087	13.135	-59.6323	Univ. West Indies (UWI) Transect	originally reported as Clermont Nose transect			Sea Level Indicator	Single Coral	reef crest; rh 3 (Speed and Cheng 2004 [GSA Bulletin]) Acropora palmata	Not reported	58	3	-5	0	-5			Mean Sea Level / General definition			U-Series	Equal to	AFM-20 (B)	ED87-008-004	Coral	130.3	0.7	131.29	0.71	162.5	2.2							Gallup et al., 1994 Chutcharavan and Dutton, 2020	Peter Chutcharavan	2021-04-20
USeries_2088	13.135	-59.6323	Univ. West Indies (UWI) Transect	originally reported as Clermont Nose transect			Sea Level Indicator	Single Coral	reef crest; rh 3 (Speed and Cheng 2004 [GSA Bulletin]) Acropora palmata	Not reported	58	3	-5	0	-5			Mean Sea Level / General definition			U-Series	Equal to	AFM-20 (C)	ED87-008-005	Coral	128.7	0.7	129.68	0.71	169.6	2.6							Gallup et al., 1994 Chutcharavan and Dutton, 2020	Peter Chutcharavan	2021-04-20
USeries_2091	13.156	-59.6333	Holders Hill Transect				Sea Level Indicator	Single Coral	Reef Crest Acropora palmata	Not reported	47	3	-5	0	-5			Mean Sea Level / General definition			U-Series	Equal to	FU-1	GA94-023-001	Coral	124.6	0.5	125.7	1.58	160.9	1.7							Gallup et al., 1994 Chutcharavan and Dutton, 2020	Peter Chutcharavan	2021-04-20
USeries_2092	13.156	-59.6333	Holders Hill Transect				Sea Level Indicator	Single Coral	Reef Crest Acropora palmata	Not reported	40	3	-5	0	-5			Mean Sea Level / General definition			U-Series	Equal to	FU-3	GA94-024-001	Coral	135.4	0.7	136.89	1	193.8	1.9							Gallup et al., 1994 Chutcharavan and Dutton, 2020	Peter Chutcharavan	2021-04-20
USeries_2098	13.1239	-59.6117	Guinea Quarry				Sea Level Indicator	Single Coral	Not Reported Acropora palmata	Not reported	44	3	-5	0	-5			Mean Sea Level / General definition			U-Series	Equal to	GQN-1	GA02-004-001	Coral	127.55	0.68	128.11	0.68	169.2	1.9							Gallup et al., 2002 Chutcharavan and Dutton, 2020	Peter Chutcharavan	2021-04-20
USeries_2099	13.135	-59.6323	Univ. West Indies (UWI) Transect	MIS-6 "Lazaretto" unit, Univ. West Indies (UWI) Hill, LIG terrace			Sea Level Indicator	Single Coral	Not Reported Acropora palmata	Not reported	36	3	-5	0	-5			Mean Sea Level / General definition			U-Series	Equal to	NU-1464	GA02-005-001	Coral	168	1.3	169.03	1.35	153.8	2.1							Gallup et al., 2002 Chutcharavan and Dutton, 2020	Peter Chutcharavan	2021-04-20
USeries_21	25.1089	-80.423	Key Largo Formation	Mile marker 101			Sea Level Indicator	Single Coral	Not Reported Siderastrea sp.	Not reported	0.67	1	-3	-3	-10			Mean High Tide (MHT)			U-Series	Equal to	184C b	FR00-004-001	Coral	134.9	40.47	135.38	1.23									Fruitjier et al., 2000 Chutcharavan and Dutton, 2020	Peter Chutcharavan	2021-04-20
USeries_2100	13.135	-59.6323	Univ. West Indies (UWI) Transect	MIS-6 "Lazaretto" unit, Univ. West Indies (UWI) Hill, LIG terrace			Sea Level Indicator	Single Coral	Not Reported Acropora palmata	Not reported	36	3	-5	0	-5			Mean Sea Level / General definition			U-Series	Equal to	NU-1466	GA02-006-001	Coral	171.5	1.3	172.53	1.37	155.5	2.2							Gallup et al., 2002 Chutcharavan and Dutton, 2020	Peter Chutcharavan	2021-04-20
USeries_2103	13.135	-59.6323	Univ. West Indies (UWI) Transect				Sea Level Indicator	Single Coral	Not Reported Acropora palmata	Not reported	34	3	-5	0	-5			Mean Sea Level / General definition			U-Series	Equal to	UWI-103	GA02-008-001	Coral	175.3	1.4	176.38	1.4	158.5	2							Gallup et al., 2002 Chutcharavan and Dutton, 2020	Peter Chutcharavan	2021-04-20
USeries_2104	13.135	-59.6323	Univ. West Indies (UWI) Transect				Sea Level Indicator	Single Coral	Not Reported Acropora palmata	Not reported	31	3	-5	0	-5			Mean Sea Level / General definition			U-Series	Equal to	UWI-108	GA02-010-001	Coral	189.2	2.3	191.32	2.36	203.7	2.6							Gallup et al., 2002 Chutcharavan and Dutton, 2020	Peter Chutcharavan	2021-04-20
USeries_2105	13.135	-59.6323	Univ. West Indies (UWI) Transect	MIS-6 "Lazaretto" unit, Univ. West Indies (UWI) Hill, LIG terrace			Sea Level Indicator	Single Coral	Not Reported Acropora palmata	Not reported	32	3	-5	0	-5			Mean Sea Level / General definition			U-Series	Equal to	NU-1467	GA02-011-001	Coral	182.7	1.5	183.99	1.49	152.6	2							Gallup et al., 2002 Chutcharavan and Dutton, 2020	Peter Chutcharavan	2021-04-20
USeries_2106	13.135	-59.6323	Univ. West Indies (UWI) Transect	MIS-6 "Lazaretto" unit, Univ. West Indies (UWI) Hill, LIG terrace			Sea Level Indicator	Single Coral	Not Reported Acropora palmata	Not reported	36	3	-5	0	-5			Mean Sea Level / General definition			U-Series	Equal to	1465b	GA02-012-001	Coral	196.1	1.8	197.53	1.77	195.3	2.4							Gallup et al., 2002 Chutcharavan and Dutton, 2020	Peter Chutcharavan	2021-04-20
USeries_2107	13.135	-59.6323	Univ. West Indies (UWI) Transect	MIS-6 "Lazaretto" unit, Univ. West Indies (UWI) Hill, LIG terrace			Sea Level Indicator	Single Coral	Not Reported Montastrea annularis	Not reported	36	3	-9.7	-1.1	-17			Mean Sea Level / General definition			U-Series	Equal to	NU-1463	GA02-013-001	Coral	205.8	2	207.34	2.04	184.5	2.6							Gallup et al., 2002 Chutcharavan and Dutton, 2020	Peter Chutcharavan	2021-04-20
USeries_2112	13.1239	-59.6117	Guinea Quarry				Sea Level Indicator	Single Coral	Not Reported Siderastrea sp.	Not reported	29	3	-10	-1.2	-32			Mean Sea Level / General definition			U-Series	Equal to	GQ-4	GA02-017-001	Coral	110.5	0.6	110.96	0.63	150.8	1.8							Gallup et al., 2002 Chutcharavan and Dutton, 2020	Peter Chutcharavan	2021-04-20
USeries_2114	13.1239	-59.6117	Guinea Quarry				Sea Level Indicator	Single Coral	Not Reported Porites sp.	Not reported	29	3	-4	0	-66			Mean Sea Level / General definition			U-Series	Equal to	GQ-1	GA02-019-001	Coral	117.7	0.7	118.18	0.65	171.3	1.6							Gallup et al., 2002 Chutcharavan and Dutton, 2020	Peter Chutcharavan	2021-04-20
USeries_2115	13.135	-59.6323	Univ. West Indies (UWI) Transect	rh1 (from Speed and Cheng, 2004 [GSA Bulletin])			Sea Level Indicator	Single Coral	not reported, this head coral is "truncated" by an erosonal surface Siderastrea sp.	Not reported	32	3	-10	-1.2	-32			Mean Sea Level / General definition			U-Series	Equal to	UWI-107	GA02-020-001	Coral	170.3	1.3	171.34	1.35	147.6	2							Gallup et al., 2002 Chutcharavan and Dutton, 2020	Peter Chutcharavan	2021-04-20
USeries_2119	13.135	-59.6323	Univ. West Indies (UWI) Transect	rh4 (from Speed and Cheng, 2004 [GSA Bulletin])			Sea Level Indicator	Single Coral	unzoned mixed reef Acropora palmata	Not reported	60	3	-1.5	-0.4	-9.4			Mean Sea Level / General definition			U-Series	Equal to	PH93-2	GA02-023-001	Coral	126.9	0.8	127.48	1.12	155.3	3.7							Gallup et al., 2002 Chutcharavan and Dutton, 2020	Peter Chutcharavan	2021-04-20
USeries_2120	13.135	-59.6323	Univ. West Indies (UWI) Transect	rh4 (from Speed and Cheng, 2004 [GSA Bulletin])			Sea Level Indicator	Single Coral	unzoned mixed reef Acropora palmata	Not reported	62	3	-1.5	-0.4	-9.4			Mean Sea Level / General definition			U-Series	Equal to	UWI-W93-1	GA02-024-001	Coral	127.3	0.7	127.88	0.75	156.6	2.3							Gallup et al., 2002 Chutcharavan and Dutton, 2020	Peter Chutcharavan	2021-04-20
USeries_2124	13.135	-59.6323	Univ. West Indies (UWI) Transect	rh4 (from Speed and Cheng, 2004 [GSA Bulletin])			Sea Level Indicator	Single Coral	unzoned mixed reef Acropora palmata	Not reported	61	3	-1.5	-0.4	-9.4			Mean Sea Level / General definition			U-Series	Equal to	PH93-3(I)	GA02-026-001	Coral	128.9	0.6	129.45	0.6	160.7	1.4							Gallup et al., 2002 Chutcharavan and Dutton, 2020	Peter Chutcharavan	2021-04-20
USeries_2125	13.135	-59.6323	Univ. West Indies (UWI) Transect	rh4 (from Speed and Cheng, 2004 [GSA Bulletin])			Sea Level Indicator	Single Coral	unzoned mixed reef Acropora palmata	Not reported	61	3	-1.5	-0.4	-9.4			Mean Sea Level / General definition			U-Series	Equal to	PH93-3(II)	GA02-026-002	Coral	130.6	0.8	131.22	0.8	159.8	1.7							Gallup et al., 2002 Chutcharavan and Dutton, 2020	Peter Chutcharavan	2021-04-20
USeries_2126	13.135	-59.6323	Univ. West Indies (UWI) Transect	rh4 (from Speed and Cheng, 2004 [GSA Bulletin])			Sea Level Indicator	Single Coral	unzoned mixed reef Acropora palmata	Not reported	62	3	-1.5	-0.4	-9.4			Mean Sea Level / General definition			U-Series	Equal to	UWI-W93-2	GA02-027-001	Coral	129.8	2.8	130.34	2.8	151.9	2.7							Gallup et al., 2002 Chutcharavan and Dutton, 2020	Peter Chutcharavan	2021-04-20
USeries_2127	13.135	-59.6323	Univ. West Indies (UWI) Transect	rh3 (from Speed and Cheng, 2004 [GSA Bulletin])			Sea Level Indicator	Single Coral	Ap facies Acropora palmata	Not reported	54	3	-5	0	-5			Mean Sea Level / General definition			U-Series	Equal to	UWI-26	GA02-028-001	Coral	131.3	1.4	132.41	1.39	172.9	1.8							Gallup et al., 2002 Chutcharavan and Dutton, 2020	Peter Chutcharavan	2021-04-20
USeries_2129	13.135	-59.6323	Univ. West Indies (UWI) Transect	rh2 (from Speed and Cheng, 2004 [GSA Bulletin])			Sea Level Indicator	Single Coral	Tabular Ap and Ac reef Acropora palmata	Not reported	39	3	-5	0	-5			Mean Sea Level / General definition			U-Series	Equal to	NU-1472	GA02-030-001	Coral	136.1	0.8	136.74	0.84	163.7	1.6							Gallup et al., 2002 Chutcharavan and Dutton, 2020	Peter Chutcharavan	2021-04-20
USeries_2130	13.135	-59.6323	Univ. West Indies (UWI) Transect	rh3 (from Speed and Cheng, 2004 [GSA Bulletin])			Sea Level Indicator	Single Coral	Ap facies Acropora palmata	Not reported	53	3	-5	0	-5			Mean Sea Level / General definition			U-Series	Equal to	UWI-23	GA02-031-001	Coral	141.5	1.4	142.16	1.39	214.8	5.1							Gallup et al., 2002 Chutcharavan and Dutton, 2020	Peter Chutcharavan	2021-04-20
USeries_2131	13.135	-59.6323	Univ. West Indies (UWI) Transect	rh2 (from Speed and Cheng, 2004 [GSA Bulletin])			Sea Level Indicator	Single Coral	Tabular Ap and Ac reef Montastrea annularis	Not reported	39	3	-5	0	-5			Mean Sea Level / General definition			U-Series	Equal to	NU-1471	GA02-032-001	Coral	135.8	0.8	136.41	0.85	150.3	1.7							Gallup et al., 2002 Chutcharavan and Dutton, 2020	Peter Chutcharavan	2021-04-20
USeries_2168	13.135	-59.6323	Univ. West Indies (UWI) Transect				Sea Level Indicator	Single Coral	reef crest; rh 3 (Speed and Cheng 2004 [GSA Bulletin]) Acropora palmata	Not reported	58	3	-5	0	-5			Mean Sea Level / General definition			U-Series	Equal to	AFM-20	ED87-008-002	Coral	129.2	1.4	127.83	1.09	160	6							Edwards et al., 1997 Chutcharavan and Dutton, 2020	Peter Chutcharavan	2021-04-20
USeries_2170	13.156	-59.6333	Holders Hill Transect				Sea Level Indicator	Single Coral	Reef Crest Acropora palmata	Not reported	47	3	-5	0	-5			Mean Sea Level / General definition			U-Series	Equal to	FU-1 (I)	GA94-023-002	Coral	122.3	0.7	123.2	0.69	157.8	1.6							Edwards et al., 1997 Chutcharavan and Dutton, 2020	Peter Chutcharavan	2021-04-20
USeries_2171	13.156	-59.6333	Holders Hill Transect				Sea Level Indicator	Single Coral	Reef Crest Acropora palmata	Not reported	47	3	-5	0	-5			Mean Sea Level / General definition			U-Series	Equal to	FU-1 (II)	GA94-023-003	Coral	122.6	0.7	123.53	0.72	160.2	1.8							Edwards et al., 1997 Chutcharavan and Dutton, 2020	Peter Chutcharavan	2021-04-20
USeries_2172	13.156	-59.6333	Holders Hill Transect				Sea Level Indicator	Single Coral	Reef Crest Acropora palmata	Not reported	40	3	-5	0	-5			Mean Sea Level / General definition			U-Series	Equal to	FU-3	GA94-024-002	Coral	147.3	0.9	148.52	0.93	240.6	1.6							Edwards et al., 1997 Chutcharavan and Dutton, 2020	Peter Chutcharavan	2021-04-20
USeries_2179	13.135	-59.6323	Univ. West Indies (UWI) Transect				Sea Level Indicator	Single Coral	reef crest; rh 3 (Speed and Cheng 2004 [GSA Bulletin]) Acropora palmata	Topographic map and digital elevation models	58	3	-5	0	-5			Mean Sea Level / General definition			U-Series	Equal to	AFM-20	ED87-008-001	Coral	129.2	1.4	130.21	1.29	160	6							Edwards et al., 1987 Chutcharavan and Dutton, 2020	Peter Chutcharavan	2021-04-20
USeries_2180	13.0644	-59.52	Barbados, West Indies	South coast, Gibbons transect			Sea Level Indicator	Single Coral	Palmata rudstone (reef crest) Acropora palmata	Not reported	23.45	3	-5	0	-5			Mean Sea Level / General definition			U-Series	Equal to	PB20-05	BL01-001-001	Coral	103.9	0.8	103.81	1.02	137	6							Blanchon and Eisenhauer, 2001 Chutcharavan and Dutton, 2020	Peter Chutcharavan	2021-04-20
USeries_2181	13.0644	-59.52	Barbados, West Indies	South coast, Gibbons transect			Sea Level Indicator	Single Coral	Palmata rudstone (reef crest) Acropora palmata	Not reported	26.75	3	-5	0	-5			Mean Sea Level / General definition			U-Series	Equal to	PB20-07	BL01-002-001	Coral	116.9	1	116.53	1.23	185	3							Blanchon and Eisenhauer, 2001 Chutcharavan and Dutton, 2020	Peter Chutcharavan	2021-04-20
USeries_2182	13.0644	-59.52	Barbados, West Indies	South coast, Gibbons transect			Sea Level Indicator	Single Coral	Palmata rudstone (reef crest) Acropora palmata	Not reported	29.75	3	-5	0	-5			Mean Sea Level / General definition			U-Series	Equal to	PB20-09	BL01-003-001	Coral	119.5	1.2	119.06	1.18	176	9							Blanchon and Eisenhauer, 2001 Chutcharavan and Dutton, 2020	Peter Chutcharavan	2021-04-20
USeries_2183	13.0644	-59.52	Barbados, West Indies	South coast, Gibbons transect			Sea Level Indicator	Single Coral	Palmata rudstone (reef crest) Acropora palmata	Not reported	28.25	3	-5	0	-5			Mean Sea Level / General definition			U-Series	Equal to	PB20-08	BL01-004-001	Coral	123.9	0.8	123.46	0.62	163	2							Blanchon and Eisenhauer, 2001 Chutcharavan and Dutton, 2020	Peter Chutcharavan	2021-04-20
USeries_2184	13.0644	-59.52	Barbados, West Indies	South coast, Gibbons transect			Sea Level Indicator	Single Coral	Palmata rudstone (reef crest) Acropora palmata	Not reported	17.45	3	-5	0	-5			Mean Sea Level / General definition			U-Series	Equal to	PB20-01	BL01-005-001	Coral	125.2	1.7	125.06	1.87	181	5							Blanchon and Eisenhauer, 2001 Chutcharavan and Dutton, 2020	Peter Chutcharavan	2021-04-20
USeries_2185	13.0644	-59.52	Barbados, West Indies	South coast, Gibbons transect			Sea Level Indicator	Single Coral	Palmata rudstone (reef crest) Acropora palmata	Not reported	20.45	3	-5	0	-5			Mean Sea Level / General definition			U-Series	Equal to	PB20-03	BL01-006-001	Coral	127.1	1.8	126.7	2.03	165	6							Blanchon and Eisenhauer, 2001 Chutcharavan and Dutton, 2020	Peter Chutcharavan	2021-04-20
USeries_2186	13.0644	-59.52	Barbados, West Indies	South coast, Gibbons transect			Sea Level Indicator	Single Coral	Palmata rudstone (reef crest) Acropora palmata	Not reported	31.25	3	-5	0	-5			Mean Sea Level / General definition			U-Series	Equal to	PB20-10	BL01-007-001	Coral	127.4	0.6	127.06	0.77	160	3							Blanchon and Eisenhauer, 2001 Chutcharavan and Dutton, 2020	Peter Chutcharavan	2021-04-20
USeries_2187	13.0644	-59.52	Barbados, West Indies	South coast, Gibbons transect			Sea Level Indicator	Single Coral	Palmata rudstone (reef crest) Acropora palmata	Not reported	25.7	3	-5	0	-5			Mean Sea Level / General definition			U-Series	Equal to	PB20-06	BL01-008-001	Coral	128.9	1.2	128.41	1.05	148	4							Blanchon and Eisenhauer, 2001 Chutcharavan and Dutton, 2020	Peter Chutcharavan	2021-04-20
USeries_2188	13.0644	-59.52	Barbados, West Indies	South coast, Gibbons transect			Sea Level Indicator	Single Coral	Palmata rudstone (reef crest) Acropora palmata	Not reported	18.95	3	-5	0	-5			Mean Sea Level / General definition			U-Series	Equal to	PB20-02	BL01-009-001	Coral	148.9	2.3	148.57	1.72	184	5							Blanchon and Eisenhauer, 2001 Chutcharavan and Dutton, 2020	Peter Chutcharavan	2021-04-20
USeries_2189	13.0771	-59.5684	Barbados, West Indies	South Coast, Erol Barrow transect			Sea Level Indicator	Single Coral	Mixed framestone (reef front) Siderastrea radians	Not reported	39.25	3	-9	-6	-12			Mean Sea Level / General definition			U-Series	Equal to	PB10-05	BL01-010-001	Coral	215.3	3.1	214.17	2.72	183	3							Blanchon and Eisenhauer, 2001 Chutcharavan and Dutton, 2020	Peter Chutcharavan	2021-04-20
USeries_22	25.1089	-80.423	Key Largo Formation	Mile marker 101			Sea Level Indicator	Single Coral	Not Reported Diploria sp.	Not reported	0.42	1	-3	-3	-10			Mean High Tide (MHT)			U-Series	Equal to	194F a	FR00-002-001	Coral	129.9	38.97	130.2	0.63									Fruitjier et al., 2000 Chutcharavan and Dutton, 2020	Peter Chutcharavan	2021-04-20
USeries_2206	13.3338	-59.621	Touce's Point	main section: top of section is 17.7 m above sea level			Sea Level Indicator	Single Coral	Growth-position coral head atop the wave-cut bench at Touce's Point. Overlain by A. Palmata storm deposits. Montastraea cavernosa	Differential GPS	11.1	1	-10	-1.8	-23			Local geoid			U-Series	Equal to	Bar-15	MU17-017-001	Coral	132.7	1.7	132.71	1.69	169.6	2.2							Muhs and Simmons, 2017 Chutcharavan and Dutton, 2020	Peter Chutcharavan	2021-04-20
USeries_2207	13.3338	-59.621	Touce's Point	main section: top of section is 17.7 m above sea level			Sea Level Indicator	Single Coral	Growth-position coral head atop the wave-cut bench at Touce's Point. Overlain by A. Palmata storm deposits. Diploria sp.	Differential GPS	10.7	1	-7.3	-0.6	-23.4			Local geoid			U-Series	Equal to	Bar-14	MU17-018-001	Coral	130.2	1.1	130.15	1.07	162.7	2.1							Muhs and Simmons, 2017 Chutcharavan and Dutton, 2020	Peter Chutcharavan	2021-04-20
USeries_2215	13.3278	-59.6109	Lorette's section	top of section is 26.9 m above sea level			Sea Level Indicator	Single Coral	Growth-position coral heads surrounded by branches of transported A. Cervicornis. Orbicella annularis	Differential GPS	26.3	1	-9.7	-1.1	-17			Local geoid			U-Series	Equal to	Bar-36	MU17-026-001	Coral	126.3	0.7	126.27	0.75	149.4	2.2							Muhs and Simmons, 2017 Chutcharavan and Dutton, 2020	Peter Chutcharavan	2021-04-20
USeries_2216	13.3278	-59.6109	Lorette's section	top of section is 26.9 m above sea level			Sea Level Indicator	Single Coral	Growth-position coral heads surrounded by branches of transported A. Cervicornis. Orbicella annularis	Differential GPS	26.8	1	-9.7	-1.1	-17			Local geoid			U-Series	Equal to	Bar-37	MU17-027-001	Coral	129.7	1	129.66	1.03	154.8	3							Muhs and Simmons, 2017 Chutcharavan and Dutton, 2020	Peter Chutcharavan	2021-04-20
USeries_2217	13.3278	-59.6109	Lorette's section	top of section is 26.9 m above sea level			Sea Level Indicator	Single Coral	Growth-position coral heads surrounded by branches of transported A. Cervicornis. Orbicella annularis	Differential GPS	25.7	1	-9.7	-1.1	-17			Local geoid			U-Series	Equal to	Bar-38	MU17-028-001	Coral	131.6	0.8	131.6	0.81	155.9	2.7							Muhs and Simmons, 2017 Chutcharavan and Dutton, 2020	Peter Chutcharavan	2021-04-20
USeries_23	25.1089	-80.423	Key Largo Formation	Mile marker 101			Sea Level Indicator	Single Coral	Not Reported Diploria sp.	Not reported	0.42	1	-3	-3	-10			Mean High Tide (MHT)			U-Series	Equal to	194F b	FR00-001-001	Coral	128.6	38.58	128.86	0.78									Fruitjier et al., 2000 Chutcharavan and Dutton, 2020	Peter Chutcharavan	2021-04-20
USeries_2358	12.3671	-69.1169	Boca Cortalein	Lower Terrace, Hato unit			Sea Level Indicator	Single Coral	Reef crest; overlain by tsunami derived coral boulders from Holocene Acropora palmata	Metered tape or rod	7.5	1.3	-5	0	-5			Mean Sea Level / General definition			U-Series	Equal to	Cur-Dat-1-A	MU12-005-001	Coral	127.3	1.2	128.09	1.19708									Muhs et al., 2012 Chutcharavan and Dutton, 2020	Peter Chutcharavan	2021-04-20
USeries_2359	12.3671	-69.1169	Boca Cortalein	Lower Terrace, Hato unit			Sea Level Indicator	Single Coral	Reef crest; overlain by tsunami derived coral boulders from Holocene Acropora palmata	Metered tape or rod	7.5	1.3	-5	0	-5			Mean Sea Level / General definition			U-Series	Equal to	Cur-Dat-1	MU12-006-001	Coral	127.3	0.9	128.102	0.931726									Muhs et al., 2012 Chutcharavan and Dutton, 2020	Peter Chutcharavan	2021-04-20
USeries_2360	12.1579	-68.8303	Boca Labadero	sinkhole (presumed Cortalein unit of Lower Terrace)			Sea Level Indicator	Single Coral	in sinkhole Acropora palmata	Metered tape or rod	2.5	0.8	-5	0	-5			Mean Sea Level / General definition			U-Series	Equal to	Cur-Dat-9	MU12-007-001	Coral	129.6	0.6	130.409	0.589822									Muhs et al., 2012 Chutcharavan and Dutton, 2020	Peter Chutcharavan	2021-04-20
USeries_2361	12.2356	-69.1044	Punta Halvedag	Lower Terrace, Hato unit			Sea Level Indicator	Single Coral	not reported, unclear if part of reef rest or Montastrea/Diploria facies Porites astreoides	Metered tape or rod	6	0.8	-6.8	-0.7	-20.5			Mean Sea Level / General definition			U-Series	Equal to	Cur-Dat-17	MU12-008-001	Coral	128.9	0.7	129.74	0.66									Muhs et al., 2012 Chutcharavan and Dutton, 2020	Peter Chutcharavan	2021-04-20
USeries_2362	12.2356	-69.1044	Punta Halvedag	Lower Terrace, Hato unit			Sea Level Indicator	Single Coral	not reported, unclear if part of reef rest or Montastrea/Diploria facies Porites astreoides	Metered tape or rod	6	0.8	-6.8	-0.7	-20.5			Mean Sea Level / General definition			U-Series	Equal to	Cur-Dat-17-A dup	MU12-009-001	Coral	130.7	1	131.49	1.02									Muhs et al., 2012 Chutcharavan and Dutton, 2020	Peter Chutcharavan	2021-04-20
USeries_2363	12.2356	-69.1044	Punta Halvedag	Lower Terrace, Hato unit			Sea Level Indicator	Single Coral	not reported, unclear if part of reef rest or Montastrea/Diploria facies Porites astreoides	Metered tape or rod	6	0.8	-6.8	-0.7	-20.5			Mean Sea Level / General definition			U-Series	Equal to	Cur-Dat-17-A	MU12-009-002	Coral	133	0.6	133.89	0.66									Muhs et al., 2012 Chutcharavan and Dutton, 2020	Peter Chutcharavan	2021-04-20
USeries_2364	12.3874	-69.1433	Un Boca	Hato unit			Sea Level Indicator	Single Coral	Not Reported Diploria sp.	Metered tape or rod	7.5	1	-7.3	-0.6	-23.4			Mean Sea Level / General definition			U-Series	Equal to	Cur-32-d	SC78-004-002	Coral	132.3	0.8	133.13	0.83									Muhs et al., 2012 Chutcharavan and Dutton, 2020	Peter Chutcharavan	2021-04-20
USeries_24	24.95	-80.5959	Key Largo Formation	Windley Key quarry			Sea Level Indicator	Single Coral	Not Reported Siderastrea sp.	Topographic map and digital elevation models	3.4249	1	-3	-3	-10			Mean High Tide (MHT)			U-Series	Equal to	222 X	FR00-012-001	Coral	126	37.8	126.191	0.446751									Fruitjier et al., 2000 Chutcharavan and Dutton, 2020	Peter Chutcharavan	2021-04-20
USeries_25	24.95	-80.5959	Key Largo Formation	Windley Key quarry			Sea Level Indicator	Single Coral	Not Reported Siderastrea sp.	Topographic map and digital elevation models	3.4249	1	-3	-3	-10			Mean High Tide (MHT)			U-Series	Equal to	222V	FR00-011-001	Coral	125.1	37.53	125.394	0.425836									Fruitjier et al., 2000 Chutcharavan and Dutton, 2020	Peter Chutcharavan	2021-04-20
USeries_26	24.95	-80.5959	Key Largo Formation	Windley Key quarry			Sea Level Indicator	Single Coral	Not Reported Diploria sp.	Topographic map and digital elevation models	3.72	1	-3	-3	-10			Mean High Tide (MHT)			U-Series	Equal to	224I E	FR00-008-001	Coral	130	39	130.23	0.54									Fruitjier et al., 2000 Chutcharavan and Dutton, 2020	Peter Chutcharavan	2021-04-20
USeries_27	24.95	-80.5959	Key Largo Formation	Windley Key quarry			Sea Level Indicator	Single Coral	Not Reported Diploria sp.	Topographic map and digital elevation models	3.7249	1	-3	-3	-10			Mean High Tide (MHT)			U-Series	Equal to	224II V	FR00-009-001	Coral	131.3	39.39	131.595	0.520111									Fruitjier et al., 2000 Chutcharavan and Dutton, 2020	Peter Chutcharavan	2021-04-20
USeries_273	21.013	-73.7	Great Inagua Island	Devil's Point Reef			Sea Level Indicator	Single Coral	in situ patch reef Diploria clivosa	Not reported	1.5	1.5	-3	-0.2	-5			Mean High Tide (MHT)			U-Series	Equal to	35 (86GI-7)	CH91-003-001	Coral	123.3	1.5	124.202	1.51088									Chen et al., 1991 Chutcharavan and Dutton, 2020	Peter Chutcharavan	2021-04-20
USeries_274	21.013	-73.7	Great Inagua Island	Devil's Point Reef			Sea Level Indicator	Single Coral	in situ patch reef Diploria strigosa	Not reported	0.5	1.5	-3	-0.2	-5			Mean High Tide (MHT)			U-Series	Equal to	37 (87GI-7)	CH91-004-001	Coral	123.8	1.1	124.68	1.08205									Chen et al., 1991 Chutcharavan and Dutton, 2020	Peter Chutcharavan	2021-04-20
USeries_276	21.013	-73.7	Great Inagua Island	Devil's Point Reef			Sea Level Indicator	Single Coral	in situ patch reef Montastrea annularis	Not reported	1	1.5	-3	-0.2	-5			Mean High Tide (MHT)			U-Series	Equal to	34 (86GI-5)	CH91-006-001	Coral	122.1	1.3	122.933	1.33821									Chen et al., 1991 Chutcharavan and Dutton, 2020	Peter Chutcharavan	2021-04-20
USeries_277	21.013	-73.7	Great Inagua Island	Devil's Point Reef			Sea Level Indicator	Single Coral	in situ patch reef Montastrea annularis	Not reported	1	1.5	-3	-0.2	-5			Mean High Tide (MHT)			U-Series	Equal to	36 (87GI-6)	CH91-007-001	Coral	122.8	1.6	123.692	1.64554									Chen et al., 1991 Chutcharavan and Dutton, 2020	Peter Chutcharavan	2021-04-20
USeries_28	24.95	-80.5959	Key Largo Formation	Windley Key quarry			Sea Level Indicator	Single Coral	Not Reported Diploria sp.	Topographic map and digital elevation models	3.7249	1	-3	-3	-10			Mean High Tide (MHT)			U-Series	Equal to	224II X	FR00-010-001	Coral	133	39.9	133.28	0.620232									Fruitjier et al., 2000 Chutcharavan and Dutton, 2020	Peter Chutcharavan	2021-04-20
USeries_298	24.0524	-74.535	San Salvador Island	Cockburn Town reef			Sea Level Indicator	Single Coral	coralstone, patch reef, in situ coral Diploria clivosa	Not reported	1.5	1.5	-3	-0.2	-3			Mean Sea Level / General definition			U-Series	Equal to	4 (87CT-3 S)	CH91-021-001	Coral	122.9	2.2	123.84	2.14									Chen et al., 1991 Chutcharavan and Dutton, 2020	Peter Chutcharavan	2021-04-20
USeries_299	24.0524	-74.535	San Salvador Island	Cockburn Town reef			Sea Level Indicator	Single Coral	coralstone, patch reef, in situ coral Diploria clivosa	Not reported	1.5	1.5	-3	-0.2	-3			Mean Sea Level / General definition			U-Series	Equal to	4 (87CT-3 L)	CH91-021-002	Coral	123.3	1.3	124.14	1.29									Chen et al., 1991 Chutcharavan and Dutton, 2020	Peter Chutcharavan	2021-04-20
USeries_30	24.95	-80.5959	Windley Key	Key Largo limestone			Sea Level Indicator	Single Coral	in situ, roadcut Montastraea annularis	Differential GPS	4.6	1.5	-3	-3	-10			Mean Sea Level / General definition			U-Series	Equal to	FL-101	MU11-036-001	Coral	118.2	0.5	118.047	0.49108									Muhs et al., 2011 Chutcharavan and Dutton, 2020	Peter Chutcharavan	2021-04-20
USeries_304	24.08	-74.53	San Salvador Island	Sue Point Reef			Sea Level Indicator	Single Coral	in situ patch reef Diploria strigosa	Not reported	1.02624	1.5	-3	-0.2	-3			Mean High Tide (MHT)			U-Series	Equal to	25 (87SP-3)	CH91-024-001	Coral	122.4	1.6	123.32	1.62									Chen et al., 1991 Chutcharavan and Dutton, 2020	Peter Chutcharavan	2021-04-20
USeries_305	24.0524	-74.535	San Salvador Island	Cockburn Town reef			Sea Level Indicator	Single Coral	coralstone, patch reef, in situ coral Diploria strigosa	Not reported	2.25	1.5	-3	-0.2	-3			Mean Sea Level / General definition			U-Series	Equal to	3 (87CT-2)	CH91-025-001	Coral	123.6	1.2	124.55	1.24									Chen et al., 1991 Chutcharavan and Dutton, 2020	Peter Chutcharavan	2021-04-20
USeries_308	24.0524	-74.535	San Salvador Island	Cockburn Town reef			Sea Level Indicator	Single Coral	coralstone, patch reef, in situ coral Montastrea annularis	Not reported	2.25	1.5	-3	-0.2	-3			Mean Sea Level / General definition			U-Series	Equal to	2 (87CT-1 S)	CH91-027-001	Coral	119.8	2.5	120.65	2.31									Chen et al., 1991 Chutcharavan and Dutton, 2020	Peter Chutcharavan	2021-04-20
USeries_309	24.0524	-74.535	San Salvador Island	Cockburn Town reef			Sea Level Indicator	Single Coral	coralstone, patch reef, in situ coral Montastrea annularis	Not reported	2.25	1.5	-3	-0.2	-3			Mean Sea Level / General definition			U-Series	Equal to	2 (87CT-1 L)	CH91-027-002	Coral	122	1.5	122.86	1.46									Chen et al., 1991 Chutcharavan and Dutton, 2020	Peter Chutcharavan	2021-04-20
USeries_31	24.95	-80.5959	Windley Key	Key Largo limestone			Sea Level Indicator	Single Coral	in situ, roadcut Montastraea annularis	Differential GPS	4.5	1.5	-3	-3	-10			Mean Sea Level / General definition			U-Series	Equal to	FL-102	MU11-035-001	Coral	118.1	0.7	117.918	0.674125									Muhs et al., 2011 Chutcharavan and Dutton, 2020	Peter Chutcharavan	2021-04-20
USeries_310	24.0524	-74.535	San Salvador Island	Cockburn Town reef			Sea Level Indicator	Single Coral	coralstone, patch reef, in situ coral Montastrea annularis	Not reported	2.25	1.5	-3	-0.2	-3			Mean Sea Level / General definition			U-Series	Equal to	1 (6/86#5)	CH91-028-001	Coral	119.9	1.4	120.72	1.43									Chen et al., 1991 Chutcharavan and Dutton, 2020	Peter Chutcharavan	2021-04-20
USeries_311	24.08	-74.53	San Salvador Island	Sue Point Reef			Sea Level Indicator	Single Coral	in situ patch reef Montastrea annularis	Not reported	1	1.5	-3	-0.2	-3			Mean Sea Level / General definition			U-Series	Equal to	24 (87SP-2)	CH91-029-001	Coral	122.1	1.4	123.05	1.46									Chen et al., 1991 Chutcharavan and Dutton, 2020	Peter Chutcharavan	2021-04-20
USeries_312	24.0524	-74.535	San Salvador Island	Cockburn Town reef			Sea Level Indicator	Single Coral	coralstone, patch reef, in situ coral Montastrea annularis	Not reported	2.5	1.5	-3	-0.2	-3			Mean Sea Level / General definition			U-Series	Equal to	6 (88CT-1)	CH91-030-001	Coral	122.3	1	123.22	0.98									Chen et al., 1991 Chutcharavan and Dutton, 2020	Peter Chutcharavan	2021-04-20
USeries_313	24.08	-74.53	San Salvador Island	Sue Point Reef			Sea Level Indicator	Single Coral	in situ patch reef Montastrea annularis	Not reported	1	1.5	-3	-0.2	-3			Mean Sea Level / General definition			U-Series	Equal to	23 (87SP-1)	CH91-031-001	Coral	122.9	1.9	123.83	1.93									Chen et al., 1991 Chutcharavan and Dutton, 2020	Peter Chutcharavan	2021-04-20
USeries_314	24.0524	-74.535	San Salvador Island	Cockburn Town reef			Sea Level Indicator	Single Coral	coralstone, patch reef, in situ coral Montastrea annularis	Not reported	2.25	1.5	-3	-0.2	-3			Mean Sea Level / General definition			U-Series	Equal to	5 (87CT-4 L)	CH91-032-001	Coral	124.2	1.3	125.1	1.27									Chen et al., 1991 Chutcharavan and Dutton, 2020	Peter Chutcharavan	2021-04-20
USeries_315	24.0524	-74.535	San Salvador Island	Cockburn Town reef			Sea Level Indicator	Single Coral	coralstone, patch reef, in situ coral Montastrea annularis	Not reported	2.25	1.5	-3	-0.2	-3			Mean Sea Level / General definition			U-Series	Equal to	5 (87CT-4 S)	CH91-032-002	Coral	124.8	2.2	125.67	2.14									Chen et al., 1991 Chutcharavan and Dutton, 2020	Peter Chutcharavan	2021-04-20
USeries_32	24.95	-80.5959	Windley Key	Key Largo limestone			Sea Level Indicator	Single Coral	in situ, roadcut Montastraea annularis	Differential GPS	4	1.5	-3	-3	-10			Mean Sea Level / General definition			U-Series	Equal to	FL-104	MU11-039-001	Coral	121.9	0.9	121.729	0.943794									Muhs et al., 2011 Chutcharavan and Dutton, 2020	Peter Chutcharavan	2021-04-20
USeries_33	24.95	-80.5959	Windley Key	Key Largo limestone			Sea Level Indicator	Single Coral	in situ, roadcut Montastraea annularis	Differential GPS	5	1.5	-3	-3	-10			Mean Sea Level / General definition			U-Series	Equal to	FL-105	MU11-040-001	Coral	124.6	0.8	124.466	0.787797									Muhs et al., 2011 Chutcharavan and Dutton, 2020	Peter Chutcharavan	2021-04-20
USeries_34	24.95	-80.5959	Windley Key	Key Largo limestone			Sea Level Indicator	Single Coral	in situ, roadcut Montastraea annularis	Differential GPS	5	1.5	-3	-3	-10			Mean Sea Level / General definition			U-Series	Equal to	FL-105A	MU11-041-001	Coral	125.2	0.7	125.064	0.704548									Muhs et al., 2011 Chutcharavan and Dutton, 2020	Peter Chutcharavan	2021-04-20
USeries_35	24.95	-80.5959	Windley Key	Key Largo limestone			Sea Level Indicator	Single Coral	in situ, roadcut Diploria strigosa	Differential GPS	4.3	1.5	-3	-3	-10			Mean Sea Level / General definition			U-Series	Equal to	FL-106	MU11-033-001	Coral	161.1	0.9	160.919	0.875684									Muhs et al., 2011 Chutcharavan and Dutton, 2020	Peter Chutcharavan	2021-04-20
USeries_36	24.95	-80.5959	Windley Key	Key Largo limestone			Sea Level Indicator	Single Coral	in situ, roadcut Diploria strigosa	Differential GPS	4.7	1.5	-3	-3	-10			Mean Sea Level / General definition			U-Series	Equal to	FL-107	MU11-032-001	Coral	122.1	0.7	121.962	0.701743									Muhs et al., 2011 Chutcharavan and Dutton, 2020	Peter Chutcharavan	2021-04-20
USeries_37	24.95	-80.5959	Windley Key	Key Largo limestone			Sea Level Indicator	Single Coral	in situ, roadcut Diploria strigosa	Differential GPS	4.25	1.5	-3	-3	-10			Mean Sea Level / General definition			U-Series	Equal to	FL-111 #2	MU11-031-001	Coral	122	0.8	121.812	0.838124									Muhs et al., 2011 Chutcharavan and Dutton, 2020	Peter Chutcharavan	2021-04-20
USeries_38	24.95	-80.5959	Windley Key	Key Largo limestone			Sea Level Indicator	Single Coral	in situ, roadcut Diploria strigosa	Differential GPS	4.9	1.5	-3	-3	-10			Mean Sea Level / General definition			U-Series	Equal to	FL-114	MU11-030-001	Coral	122	0.6	119.895	0.632482									Muhs et al., 2011 Chutcharavan and Dutton, 2020	Peter Chutcharavan	2021-04-20
USeries_39	24.95	-80.5959	Windley Key	Key Largo limestone			Sea Level Indicator	Single Coral	in situ, roadcut Diploria strigosa	Differential GPS	5	1.5	-3	-3	-10			Mean Sea Level / General definition			U-Series	Equal to	FL-115	MU11-029-001	Coral	119.8	0.6	119.595	0.6007									Muhs et al., 2011 Chutcharavan and Dutton, 2020	Peter Chutcharavan	2021-04-20
USeries_40	24.95	-80.5959	Windley Key	Key Largo limestone			Sea Level Indicator	Single Coral	in situ, roadcut Diploria strigosa	Differential GPS	4.6	1.5	-3	-3	-10			Mean Sea Level / General definition			U-Series	Equal to	FL-116	MU11-028-001	Coral	118.2	0.8	117.989	0.74801									Muhs et al., 2011 Chutcharavan and Dutton, 2020	Peter Chutcharavan	2021-04-20
USeries_41	24.95	-80.5959	Windley Key	Key Largo limestone			Sea Level Indicator	Single Coral	in situ, roadcut Diploria strigosa	Differential GPS	4.2	1.5	-3	-3	-10			Mean Sea Level / General definition			U-Series	Equal to	FL-117	MU11-026-002	Coral	115.4	0.6	115.238	0.568452									Muhs et al., 2011 Chutcharavan and Dutton, 2020	Peter Chutcharavan	2021-04-20
USeries_42	24.95	-80.5959	Windley Key	Key Largo limestone			Sea Level Indicator	Single Coral	in situ, roadcut Diploria strigosa	Differential GPS	4.2	1.5	-3	-3	-10			Mean Sea Level / General definition			U-Series	Equal to	FL-117 dup #1	MU11-026-001	Coral	115.1	0.6	114.896	0.578726									Muhs et al., 2011 Chutcharavan and Dutton, 2020	Peter Chutcharavan	2021-04-20
USeries_43	24.95	-80.5959	Windley Key	Key Largo limestone			Sea Level Indicator	Single Coral	in situ, roadcut Montastraea annularis	Differential GPS	4.3	1.5	-3	-3	-10			Mean Sea Level / General definition			U-Series	Equal to	FL-118	MU11-034-002	Coral	114.3	0.6	114.147	0.627505									Muhs et al., 2011 Chutcharavan and Dutton, 2020	Peter Chutcharavan	2021-04-20
USeries_44	24.95	-80.5959	Windley Key	Key Largo limestone			Sea Level Indicator	Single Coral	in situ, roadcut Montastraea annularis	Differential GPS	4.3	1.5	-3	-3	-10			Mean Sea Level / General definition			U-Series	Equal to	FL-118 dup #1	MU11-034-001	Coral	113.4	0.6	113.263	0.593544									Muhs et al., 2011 Chutcharavan and Dutton, 2020	Peter Chutcharavan	2021-04-20
USeries_45	24.95	-80.5959	Windley Key	Key Largo limestone			Sea Level Indicator	Single Coral	in situ, roadcut Montastraea sp.	Differential GPS	5.1	1.5	-3	-3	-10			Mean Sea Level / General definition			U-Series	Equal to	FL-119	MU11-042-001	Coral	124	0.7	123.822	0.666664									Muhs et al., 2011 Chutcharavan and Dutton, 2020	Peter Chutcharavan	2021-04-20
USeries_46	24.95	-80.5959	Windley Key	Key Largo limestone			Sea Level Indicator	Single Coral	in situ, roadcut Montastraea sp., c.f. M. annularis	Differential GPS	5.1	1.5	-3	-3	-10			Mean Sea Level / General definition			U-Series	Equal to	FL-120	MU11-038-001	Coral	121.6	0.9	121.464	0.860896									Muhs et al., 2011 Chutcharavan and Dutton, 2020	Peter Chutcharavan	2021-04-20
USeries_47	24.95	-80.5959	Windley Key	Key Largo limestone			Sea Level Indicator	Single Coral	in situ, roadcut Acropora palmata	Differential GPS	5	1.5	-3	-3	-10			Mean Sea Level / General definition			U-Series	Equal to	FL-121	MU11-025-001	Coral	114.6	0.5	114.46	0.53									Muhs et al., 2011 Chutcharavan and Dutton, 2020	Peter Chutcharavan	2021-04-20
USeries_48	24.95	-80.5959	Windley Key	Key Largo limestone			Sea Level Indicator	Single Coral	in situ, roadcut Montastraea annularis	Differential GPS	4.7	1.5	-3	-3	-10			Mean Sea Level / General definition			U-Series	Equal to	FL-122	MU11-037-001	Coral	120.5	0.8	120.363	0.778246									Muhs et al., 2011 Chutcharavan and Dutton, 2020	Peter Chutcharavan	2021-04-20
USeries_49	24.95	-80.5959	Windley Key	Key Largo limestone			Sea Level Indicator	Single Coral	in situ, roadcut Diploria strigosa	Differential GPS	4.5	1.5	-3	-3	-10			Mean Sea Level / General definition			U-Series	Equal to	FL-125	MU11-027-001	Coral	115.7	0.6	115.532	0.57574									Muhs et al., 2011 Chutcharavan and Dutton, 2020	Peter Chutcharavan	2021-04-20
USeries_50	25.1376	-80.4029	Key Largo, Adams cut	Key Largo limestone			Sea Level Indicator	Single Coral	in situ Montastraea annularis	Differential GPS	3.6	1.5	-3	-3	-10			Mean Sea Level / General definition			U-Series	Equal to	FL-128	MU11-016-001	Coral	118.3	1.5	118.13	1.51									Muhs et al., 2011 Chutcharavan and Dutton, 2020	Peter Chutcharavan	2021-04-20
USeries_51	24.7706	-80.9393	Grassy Key	Key Largo limestone			Sea Level Indicator	Single Coral	PROBABLY in situ Montastraea annularis	Differential GPS	1	1.5	-3	-3	-10			Mean Sea Level / General definition			U-Series	Equal to	FL-140	MU11-002-001	Coral	120.3	0.7	120.15	0.69									Muhs et al., 2011 Chutcharavan and Dutton, 2020	Peter Chutcharavan	2021-04-20
USeries_52	24.7489	-80.9784	Crawl Key	Key Largo limestone			Sea Level Indicator	Single Coral	PROBABLY in situ Montastraea annularis	Differential GPS	3.5	1.5	-3	-3	-10			Mean Sea Level / General definition			U-Series	Equal to	FL-145	MU11-001-001	Coral	118.9	0.6	118.77	0.57									Muhs et al., 2011 Chutcharavan and Dutton, 2020	Peter Chutcharavan	2021-04-20
USeries_53	24.95	-80.5959	Key Largo	Key Largo limestone			Sea Level Indicator	Single Coral	in situ, roadcut Montastraea annularis	Differential GPS	2.7	1.5	-3	-3	-10			Mean Sea Level / General definition			U-Series	Equal to	FL-155	MU11-008-001	Coral	121.8	0.6	121.652	0.630857									Muhs et al., 2011 Chutcharavan and Dutton, 2020	Peter Chutcharavan	2021-04-20
USeries_54	24.95	-80.5959	Key Largo	Key Largo limestone			Sea Level Indicator	Single Coral	in situ, roadcut Montastraea annularis	Differential GPS	2.1	1.5	-3	-3	-10			Mean Sea Level / General definition			U-Series	Equal to	FL-156A	MU11-006-001	Coral	120	0.5	119.867	0.508606									Muhs et al., 2011 Chutcharavan and Dutton, 2020	Peter Chutcharavan	2021-04-20
USeries_55	24.95	-80.5959	Key Largo	Key Largo limestone			Sea Level Indicator	Single Coral	in situ, roadcut Montastraea annularis	Differential GPS	2.55	1.5	-3	-3	-10			Mean Sea Level / General definition			U-Series	Equal to	FL-157	MU11-005-001	Coral	119.4	0.6	119.273	0.609832									Muhs et al., 2011 Chutcharavan and Dutton, 2020	Peter Chutcharavan	2021-04-20
USeries_56	24.95	-80.5959	Key Largo	Key Largo limestone			Sea Level Indicator	Single Coral	in situ, roadcut Montastraea annularis	Differential GPS	2.1	1.5	-3	-3	-10			Mean Sea Level / General definition			U-Series	Equal to	FL-161	MU11-009-001	Coral	124.4	0.8	124.247	0.783111									Muhs et al., 2011 Chutcharavan and Dutton, 2020	Peter Chutcharavan	2021-04-20
USeries_58	24.95	-80.5959	Key Largo	Key Largo limestone			Sea Level Indicator	Single Coral	in situ, roadcut Montastraea annularis	Differential GPS	3.2	1.5	-3	-3	-10			Mean Sea Level / General definition			U-Series	Equal to	FL-163	MU11-011-001	Coral	134	0.6	133.758	0.578849									Muhs et al., 2011 Chutcharavan and Dutton, 2020	Peter Chutcharavan	2021-04-20
USeries_59	24.95	-80.5959	Key Largo	Key Largo limestone			Sea Level Indicator	Single Coral	in situ, roadcut Montastraea annularis	Differential GPS	2.9	1.5	-3	-3	-10			Mean Sea Level / General definition			U-Series	Equal to	FL-165	MU11-007-001	Coral	120	0.8	119.888	0.76197									Muhs et al., 2011 Chutcharavan and Dutton, 2020	Peter Chutcharavan	2021-04-20
USeries_60	24.95	-80.5959	Key Largo	Key Largo limestone			Sea Level Indicator	Single Coral	in situ, roadcut Diploria strigosa	Differential GPS	2.7	1.5	-3	-3	-10			Mean Sea Level / General definition			U-Series	Equal to	FL-166	MU11-004-001	Coral	161	1.1	160.77	1.05									Muhs et al., 2011 Chutcharavan and Dutton, 2020	Peter Chutcharavan	2021-04-20
USeries_61	25.1821	-80.3631	Key Largo, north	Key Largo limestone			Sea Level Indicator	Single Coral	in situ Montastraea sp., cf. M. cavernosa	Differential GPS	1.8	1.5	-3	-3	-10			Mean Sea Level / General definition			U-Series	Equal to	FL-180	MU11-019-001	Coral	121.9	0.6	121.81	0.58									Muhs et al., 2011 Chutcharavan and Dutton, 2020	Peter Chutcharavan	2021-04-20
USeries_62	25.1821	-80.3631	Key Largo, north	Key Largo limestone			Sea Level Indicator	Single Coral	in situ Montastraea annularis	Differential GPS	1.8	1.5	-3	-3	-10			Mean Sea Level / General definition			U-Series	Equal to	FL-183	MU11-018-001	Coral	132.1	0.9	131.98	0.9									Muhs et al., 2011 Chutcharavan and Dutton, 2020	Peter Chutcharavan	2021-04-20
USeries_63	25.1821	-80.3631	Key Largo, north	Key Largo limestone			Sea Level Indicator	Single Coral	in situ Diploria strigosa	Differential GPS	1.8	1.5	-3	-3	-10			Mean Sea Level / General definition			U-Series	Equal to	FL-185	MU11-017-001	Coral	122.6	0.7	122.45	0.66									Muhs et al., 2011 Chutcharavan and Dutton, 2020	Peter Chutcharavan	2021-04-20
USeries_67	25.1763	-80.3669	Key Largo Hammock	Key Largo limestone			Sea Level Indicator	Single Coral	in situ Montastraea annularis	Differential GPS	3.5	1.5	-3	-3	-10			Mean Sea Level / General definition			U-Series	Equal to	FL-222A	MU11-012-001	Coral	123	0.6	122.801	0.615354									Muhs et al., 2011 Chutcharavan and Dutton, 2020	Peter Chutcharavan	2021-04-20
USeries_68	25.1763	-80.3669	Key Largo Hammock	Key Largo limestone			Sea Level Indicator	Single Coral	in situ Montastraea annularis	Differential GPS	3.5	1.5	-3	-3	-10			Mean Sea Level / General definition			U-Series	Equal to	FL-222A,dup	MU11-012-002	Coral	123.4	0.5	123.21	0.55									Muhs et al., 2011 Chutcharavan and Dutton, 2020	Peter Chutcharavan	2021-04-20
USeries_69	25.1763	-80.3669	Key Largo Hammock	Key Largo limestone			Sea Level Indicator	Single Coral	in situ Montastraea annularis	Differential GPS	3.5	1.5	-3	-3	-10			Mean Sea Level / General definition			U-Series	Equal to	FL-222C	MU11-013-001	Coral	143.7	1	143.49	0.98									Muhs et al., 2011 Chutcharavan and Dutton, 2020	Peter Chutcharavan	2021-04-20
RSL_3971	-25.835	114.017	Shark Bay Pelican Is.	Pelican Is.	Australia	Western Australia	Marine Limiting	The datapoint is a marine or terrestrial limiting indicator		Theodolite and rod	0	1.5				0	0	Mean Sea Level / General definition	0	1.5	U-Series	Equal to	SPI5_c	OL08-002-001	Coral	119.6	0.58	119.91	0.6							0	4	O'Leary et al., 2008 Chutcharavan and Dutton, 2020	Peter Chutcharavan	2021-04-20 08:22:33
RSL_3971	-25.835	114.017	Shark Bay Pelican Is.	Pelican Is.	Australia	Western Australia	Marine Limiting	The datapoint is a marine or terrestrial limiting indicator		Theodolite and rod	0	1.5				0	0	Mean Sea Level / General definition	0	1.5	U-Series	Equal to	SPI4_c	OL08-003-001	Coral	122.8	0.65	122.76	0.63							0	4	O'Leary et al., 2008 Chutcharavan and Dutton, 2020	Peter Chutcharavan	2021-04-20 08:22:33
RSL_3972	-25.95	113.133	Shark Bay Tetrodon L	Tetrodon L	Australia	Western Australia	Marine Limiting	The datapoint is a marine or terrestrial limiting indicator		Theodolite and rod	1.5	0.1				0	0	Mean Sea Level / General definition	1.5	0.1	U-Series	Equal to	STG4_c	OL08-009-001	Coral	125.4	0.76	126.244	0.662287							0	4	O'Leary et al., 2008 Chutcharavan and Dutton, 2020	Peter Chutcharavan	2021-04-20 08:25:08
RSL_3972	-25.95	113.133	Shark Bay Tetrodon L	Tetrodon L	Australia	Western Australia	Marine Limiting	The datapoint is a marine or terrestrial limiting indicator		Theodolite and rod	1.5	0.1				0	0	Mean Sea Level / General definition	1.5	0.1	U-Series	Equal to	STG5_c	OL08-010-001	Coral	127	1	126.71	0.96							0	4	O'Leary et al., 2008 Chutcharavan and Dutton, 2020	Peter Chutcharavan	2021-04-20 08:25:08
RSL_3972	-25.95	113.133	Shark Bay Tetrodon L	Tetrodon L	Australia	Western Australia	Marine Limiting	The datapoint is a marine or terrestrial limiting indicator		Theodolite and rod	1.5	0.1				0	0	Mean Sea Level / General definition	1.5	0.1	U-Series	Equal to	STG1_c	OL08-011-001	Coral	128.8	0.92	129.09	0.94							0	4	O'Leary et al., 2008 Chutcharavan and Dutton, 2020	Peter Chutcharavan	2021-04-20 08:25:08
RSL_3973	-25.9176	114.256	Shark Bay Gladstone N	Gladstone N	Australia	Western Australia	Marine Limiting	The datapoint is a marine or terrestrial limiting indicator		Theodolite and rod	0	1.5				0	0	Mean Sea Level / General definition	0	1.5	U-Series	Equal to	SGN3_c	OL08-012-001	Coral	126.87	0.47	126.74	0.34							0	4	O'Leary et al., 2008 Chutcharavan and Dutton, 2020	Peter Chutcharavan	2021-04-20 08:29:54
RSL_3973	-25.9176	114.256	Shark Bay Gladstone N	Gladstone N	Australia	Western Australia	Marine Limiting	The datapoint is a marine or terrestrial limiting indicator		Theodolite and rod	0	1.5				0	0	Mean Sea Level / General definition	0	1.5	U-Series	Equal to	SGN1_c	OL08-013-001	Coral	127.3	1.1									0	4	O'Leary et al., 2008 Chutcharavan and Dutton, 2020	Peter Chutcharavan	2021-04-20 08:29:54
RSL_3970	13.135	-59.6323	Univ. West Indies (UWI) Transect Rendezvous Hill Terrace	Rendezvous Hill Terrace	Barbados	Saint Michael	Marine Limiting	The datapoint is a marine or terrestrial limiting indicator	Coral taxon not reported, treat as marine limiting	Not reported	40	3				0	0	Mean Sea Level / General definition	40	3	U-Series	Equal to	UWI-8	GA02-014-001	Coral	129.02	0.84	129.59	0.84	155.4	1.9					0	4	Gallup et al., 2002 Chutcharavan and Dutton, 2020	Peter Chutcharavan	2021-04-20 08:18:15
RSL_3970	13.135	-59.6323	Univ. West Indies (UWI) Transect Rendezvous Hill Terrace	Rendezvous Hill Terrace	Barbados	Saint Michael	Marine Limiting	The datapoint is a marine or terrestrial limiting indicator	Coral taxon not reported, treat as marine limiting	Not reported	40	3				0	0	Mean Sea Level / General definition	40	3	U-Series	Equal to	UWI-6	GA02-015-001	Coral	129.9	0.8	130.48	0.81	159.7	1.7					0	4	Gallup et al., 2002 Chutcharavan and Dutton, 2020	Peter Chutcharavan	2021-04-20 08:18:15
RSL_3969	-22.4783	166.466	Amedee Inlet AM5-46P	AM5-46P	New Caledonia	Not Available	Marine Limiting	The datapoint is a marine or terrestrial limiting indicator	Amedee reef; core AM5	Not reported	-27.18	1				0	0	Mean Low Tide (MLT)	0	0	U-Series	Equal to	AM5-46P	FR06-028-001	Coral	132.8	1.9	133.01	1.93							0	4	Frank et al., 2006 Chutcharavan and Dutton, 2020	Peter Chutcharavan	2021-04-20 07:45:11
RSL_3974	-6.10346	147.603	Huon Peninsula Kwambu-Terrace VIIb	Kwambu-Terrace VIIb	Papua New Guinea	Morobe	Marine Limiting	The datapoint is a marine or terrestrial limiting indicator		Not reported	223	3				0	0	Mean Sea Level / General definition	223	3	U-Series	Equal to	HP-47	ST93-005-001	Coral	118.1	1	118.9	1.01							0	4	Stein et al., 1993 Chutcharavan and Dutton, 2020	Peter Chutcharavan	2021-04-20 08:34:31
RSL_3974	-6.10346	147.603	Huon Peninsula Kwambu-Terrace VIIb	Kwambu-Terrace VIIb	Papua New Guinea	Morobe	Marine Limiting	The datapoint is a marine or terrestrial limiting indicator		Not reported	223	3				0	0	Mean Sea Level / General definition	223	3	U-Series	Equal to	HP-22	ST93-006-001	Coral	135.8	1.9	136.79	1.75							0	4	Stein et al., 1993 Chutcharavan and Dutton, 2020	Peter Chutcharavan	2021-04-20 08:34:31
RSL_3974	-6.10346	147.603	Huon Peninsula Kwambu-Terrace VIIb	Kwambu-Terrace VIIb	Papua New Guinea	Morobe	Marine Limiting	The datapoint is a marine or terrestrial limiting indicator		Not reported	223	3				0	0	Mean Sea Level / General definition	223	3	U-Series	Equal to	HP-23-b	ST93-007-001	Coral	131.9	1.2	133.02	1.2							0	4	Stein et al., 1993 Chutcharavan and Dutton, 2020	Peter Chutcharavan	2021-04-20 08:34:31
RSL_3974	-6.10346	147.603	Huon Peninsula Kwambu-Terrace VIIb	Kwambu-Terrace VIIb	Papua New Guinea	Morobe	Marine Limiting	The datapoint is a marine or terrestrial limiting indicator		Not reported	223	3				0	0	Mean Sea Level / General definition	223	3	U-Series	Equal to	HP-23-a	ST93-007-002	Coral	134.7	1.3	135.88	1.3							0	4	Stein et al., 1993 Chutcharavan and Dutton, 2020	Peter Chutcharavan	2021-04-20 08:34:31
RSL_3975	-6.10346	147.603	Huon Peninsula Sialum Terrace VIIb	Sialum Terrace VIIb	Papua New Guinea	Morobe	Marine Limiting	The datapoint is a marine or terrestrial limiting indicator		Barometric altimeter	197	3				0	0	Mean Sea Level / General definition	197	3	U-Series	Equal to	HP-23	ST93-007-003	Coral	136.7	1.6	137.06	1.88							0	4	Stein et al., 1993 Chutcharavan and Dutton, 2020 Esat et al., 1999	Peter Chutcharavan	2021-04-20 08:38:48

## Sheet: RSL from single coral
WALIS U-Series ID	Is this datapoint public?	Material type	Details on dated material	Were U-Series data recalculated?	Type of spectrometry	Are RSL estimates available for this record?	Are data on tectonics available?	Reference(s)	IGSN	Sample ID	Analysis ID	Reported ID	Date of analysis	Accepted?	Reason for rejection	Accepted in other study? (Flexible)	Reason for rejection in other studies (Flexible)	Other study ID (Flexible)	Screening (Flexible)	Accepted in other study? (Strict)	Reason for rejection in other studies (Strict)	Other study ID (Strict)	Screening (Strict)	Location	Site	Additional site information	Latitude (decimal degrees)	Longitude (decimal degrees)	Reported Latitude	Reported Longitude	Are Lat/Long estimated?	Comments on geographic coordinates	Original elevation datum used	Elevation measurement method	Reported elevation (m)	Reported elevation uncertainty (m)	Elevation above MSL (m)	Elevation uncertainty used (m)	Interpreted elevation relative to mllw/mlws (m)	Elevation comments	Tectonic category	Published uplift rate (m/ky)	Published uncertainty in uplift rate (m/ky)	Interpreted uplift rate (m/ky)	Interpreted uplift rate uncertainty (m/ky)	Comments (uplift), including sources of uplift rates	Terrace ID	Facies description	Reported as in situ?
1450	1	Coral		Yes	Mass Spectrometer	Yes	Yes	Al-Mikhlafi et al., 2018 Chutcharavan and Dutton, 2020		AL18-016	AL18-016-001	PI 01	2018-01-01	No	Single analysis; see Section 5 "Discussion" in ref. main text for diagenetic considerations	No	Single analysis; calcite content >= 2 %	Chutcharavan and Dutton, 2020	Flexible protocol	No	Single analysis; calcite content >= 2 %	Chutcharavan and Dutton, 2020	Strict protocol	Yemen	Perim Island		12.6625	43.3905	N/A	N/A	Yes	based off sitemaps in main text	Mean Sea Level / General definition	Topographic map and digital elevation models	4	2	4	2		Estimated with handheld GPS and topographic map, then directly measured using tape.	Stable						Tr2	patch-reef lagoonal environment	Yes
1451	1	Coral		Yes	Mass Spectrometer	Yes	Yes	Al-Mikhlafi et al., 2018 Chutcharavan and Dutton, 2020		AL18-017	AL18-017-001	PI 02	2018-01-01	No	Single analysis; see Section 5 "Discussion" in ref. main text for diagenetic considerations	No	Single analysis; calcite content >= 2 %; 232Th concentration > 2 ppb; outside acceptable range for initial uranium isotopic composition (delta 234Ui = 145 +7/-5)	Chutcharavan and Dutton, 2020	Flexible protocol	No	Single analysis; calcite content >= 2 %; 232Th concentration > 2 ppb; outside acceptable range for initial uranium isotopic composition (delta 234Ui = 145 +/- 5 per mil)	Chutcharavan and Dutton, 2020	Strict protocol	Yemen	Perim Island		12.6625	43.3905	N/A	N/A	Yes	based off sitemaps in main text	Mean Sea Level / General definition	Topographic map and digital elevation models	4	2	4	2		Estimated with handheld GPS and topographic map, then directly measured using tape.	Stable						Tr2	patch-reef lagoonal environment	Yes
1452	1	Coral		Yes	Mass Spectrometer	Yes	Yes	Al-Mikhlafi et al., 2018 Chutcharavan and Dutton, 2020		AL18-018	AL18-018-001	PI 03	2018-01-01	No	Single analysis; see Section 5 "Discussion" in ref. main text for diagenetic considerations	No	Single analysis; calcite content >= 2 %	Chutcharavan and Dutton, 2020	Flexible protocol	No	Single analysis; calcite content >= 2 %	Chutcharavan and Dutton, 2020	Strict protocol	Yemen	Perim Island		12.6625	43.3905	N/A	N/A	Yes	based off sitemaps in main text	Mean Sea Level / General definition	Topographic map and digital elevation models	4	2	4	2		Estimated with handheld GPS and topographic map, then directly measured using tape.	Stable						Tr2	patch-reef lagoonal environment	Yes
1160	1	Coral		Yes	Mass Spectrometer	Yes	Yes	Bard et al., 1990 Chutcharavan and Dutton, 2020		BA90-021	BA90-021-001	C1	1990-01-01	Yes		Yes		Chutcharavan and Dutton, 2020	Flexible protocol	No	Single analysis; 232Th concentration not reported	Chutcharavan and Dutton, 2020	Strict protocol	Haiti	Haiti	northwest coast	19.85	-73.2667	N/A	N/A	Yes		Mean Sea Level / General definition	Not reported	52	Not Reported	52	3		No elevation uncertainty quoted; assumed ± 3 m, which is consistent with the elevation uncertainty for other reef terraces reported in Dodge et al., 1983 (Science, 219: 1423-1425)	Uplifting		Not Reported	0.361789	0.0773483	Uplift rate recalculated using the elevation of the Last Interglacial terrace (~52 m) given in Dodge et al., 1983 (Science, 219: 1423-1425)	Nicolas Terrace	reef crest	Yes
1161	1	Coral		Yes	Mass Spectrometer	Yes	Yes	Bard et al., 1990 Chutcharavan and Dutton, 2020		BA90-022	BA90-022-001	C-4 #1	1990-01-01	Yes		Yes		Chutcharavan and Dutton, 2020	Flexible protocol	No	Two analyses of the same coral; this subsample 232Th concentration not reported	Chutcharavan and Dutton, 2020	Strict protocol	Haiti	Haiti	northwest coast	19.85	-73.2667	N/A	N/A	Yes		Mean Sea Level / General definition	Not reported	52	Not Reported	52	3		No elevation uncertainty quoted; assumed ± 3 m, which is consistent with the elevation uncertainty for other reef terraces reported in Dodge et al., 1983 (Science, 219: 1423-1425)	Uplifting		Not Reported	0.361789	0.0773483	Uplift rate recalculated using the elevation of the Last Interglacial terrace (~52 m) given in Dodge et al., 1983 (Science, 219: 1423-1425)	Nicolas Terrace	reef crest	Yes
1162	1	Coral		Yes	Mass Spectrometer	Yes	Yes	Bard et al., 1990 Chutcharavan and Dutton, 2020		BA90-022	BA90-022-002	C-4 #2	1990-01-01	Yes		Yes		Chutcharavan and Dutton, 2020	Flexible protocol	No	Two analyses of the same coral; this subsample 232Th concentration not reported	Chutcharavan and Dutton, 2020	Strict protocol	Haiti	Haiti	northwest coast	19.85	-73.2667	N/A	N/A	Yes		Mean Sea Level / General definition	Not reported	52	Not Reported	52	3		No elevation uncertainty quoted; assumed ± 3 m, which is consistent with the elevation uncertainty for other reef terraces reported in Dodge et al., 1983 (Science, 219: 1423-1425)	Uplifting		Not Reported	0.361789	0.0773483	Uplift rate recalculated using the elevation of the Last Interglacial terrace (~52 m) given in Dodge et al., 1983 (Science, 219: 1423-1425)	Nicolas Terrace	reef crest	Yes
2180	1	Coral		Yes	Mass spectrometer	Yes	Yes	Blanchon and Eisenhauer, 2001 Chutcharavan and Dutton, 2020		BL01-001	BL01-001-001	PB20-05	2001-01-01	No	Single analysis; outside acceptable range for initial uranium isotopic composition (delta 234Ui = 149 ± 2 per mil)	Yes		Chutcharavan and Dutton, 2020	Flexible protocol	Yes		Chutcharavan and Dutton, 2020	Strict protocol	Barbados	Barbados, West Indies	South coast, Gibbons transect	13.0644	-59.52	N/A	N/A	Yes		Mean Sea Level / General definition	Not reported	23.45	Not Reported	23.45	3	23.75	mllw elevation calculated using tidal data from Bridgetown, Barbados from Admiralty Tide Tables (2016), v. 2; elevation uncertainty used from Dutton and Lambeck 2016	Uplifting	0.232558	Not Reported	0.239837	0.0530652	highest elevation in LIG terrace = 37 m, using 123/+7.5 m benchmark	Rendezvous Hill Terrace	Palmata rudstone (reef crest)	Yes
2181	1	Coral		Yes	Mass spectrometer	Yes	Yes	Blanchon and Eisenhauer, 2001 Chutcharavan and Dutton, 2020		BL01-002	BL01-002-001	PB20-07	2001-01-01	No	Single analysis; outside acceptable range for initial uranium isotopic composition (delta 234Ui = 149 ± 2 per mil)	No	Single analysis; calcite content >= 2 %; outside acceptable range for initial uranium isotopic composition (delta 234Ui = 145 +7/-5 per mil)	Chutcharavan and Dutton, 2020	Flexible protocol	No	Single analysis; calcite content >= 2 %; outside acceptable range for initial uranium isotopic composition (delta 234Ui = 145 +/- 5 per mil)	Chutcharavan and Dutton, 2020	Strict protocol	Barbados	Barbados, West Indies	South coast, Gibbons transect	13.0644	-59.52	N/A	N/A	Yes		Mean Sea Level / General definition	Not reported	26.75	Not Reported	26.75	3	27.05	mllw elevation calculated using tidal data from Bridgetown, Barbados from Admiralty Tide Tables (2016), v. 2; elevation uncertainty used from Dutton and Lambeck 2018	Uplifting	0.232558	Not Reported	0.239837	0.0530652	highest elevation in LIG terrace = 37 m, using 123/+7.5 m benchmark	Rendezvous Hill Terrace	Palmata rudstone (reef crest)	Yes
2182	1	Coral		Yes	Mass spectrometer	Yes	Yes	Blanchon and Eisenhauer, 2001 Chutcharavan and Dutton, 2020		BL01-003	BL01-003-001	PB20-09	2001-01-01	No	Single analysis; outside acceptable range for initial uranium isotopic composition (delta 234Ui = 149 ± 2 per mil)	No	Single analysis; outside acceptable range for initial uranium isotopic composition (delta 234Ui = 145 +7/-5 per mil)	Chutcharavan and Dutton, 2020	Flexible protocol	No	Single analysis; outside acceptable range for initial uranium isotopic composition (delta 234Ui = 145 +/- 5 per mil)	Chutcharavan and Dutton, 2020	Strict protocol	Barbados	Barbados, West Indies	South coast, Gibbons transect	13.0644	-59.52	N/A	N/A	Yes		Mean Sea Level / General definition	Not reported	29.75	Not Reported	29.75	3	30.05	mllw elevation calculated using tidal data from Bridgetown, Barbados from Admiralty Tide Tables (2016), v. 2; elevation uncertainty used from Dutton and Lambeck 2020	Uplifting	0.232558	Not Reported	0.239837	0.0530652	highest elevation in LIG terrace = 37 m, using 123/+7.5 m benchmark	Rendezvous Hill Terrace	Palmata rudstone (reef crest)	Yes
2183	1	Coral		Yes	Mass spectrometer	Yes	Yes	Blanchon and Eisenhauer, 2001 Chutcharavan and Dutton, 2020		BL01-004	BL01-004-001	PB20-08	2001-01-01	No	Single analysis; outside acceptable range for initial uranium isotopic composition (delta 234Ui = 149 ± 2 per mil)	No	Single analysis; calcite content >= 2 %; outside acceptable range for initial uranium isotopic composition (delta 234Ui = 145 +7/-5 per mil)	Chutcharavan and Dutton, 2020	Flexible protocol	No	Single analysis; calcite content >= 2 %; outside acceptable range for initial uranium isotopic composition (delta 234Ui = 145 +/- 5 per mil)	Chutcharavan and Dutton, 2020	Strict protocol	Barbados	Barbados, West Indies	South coast, Gibbons transect	13.0644	-59.52	N/A	N/A	Yes		Mean Sea Level / General definition	Not reported	28.25	Not Reported	28.25	3	28.55	mllw elevation calculated using tidal data from Bridgetown, Barbados from Admiralty Tide Tables (2016), v. 2; elevation uncertainty used from Dutton and Lambeck 2019	Uplifting	0.232558	Not Reported	0.239837	0.0530652	highest elevation in LIG terrace = 37 m, using 123/+7.5 m benchmark	Rendezvous Hill Terrace	Palmata rudstone (reef crest)	Yes
2184	1	Coral		Yes	Mass spectrometer	Yes	Yes	Blanchon and Eisenhauer, 2001 Chutcharavan and Dutton, 2020		BL01-005	BL01-005-001	PB20-01	2001-01-01	No	Single analysis; outside acceptable range for initial uranium isotopic composition (delta 234Ui = 149 ± 2 per mil)	No	Single analysis; calcite content >= 2 %; outside acceptable range for initial uranium isotopic composition (delta 234Ui = 145 +7/-5 per mil)	Chutcharavan and Dutton, 2020	Flexible protocol	No	Single analysis; calcite content >= 2 %; outside acceptable range for initial uranium isotopic composition (delta 234Ui = 145 +/- 5 per mil)	Chutcharavan and Dutton, 2020	Strict protocol	Barbados	Barbados, West Indies	South coast, Gibbons transect	13.0644	-59.52	N/A	N/A	Yes		Mean Sea Level / General definition	Not reported	17.45	Not Reported	17.45	3	17.75	mllw elevation calculated using tidal data from Bridgetown, Barbados from Admiralty Tide Tables (2016), v. 2; elevation uncertainty used from Dutton and Lambeck 2013	Uplifting	0.232558	Not Reported	0.239837	0.0530652	highest elevation in LIG terrace = 37 m, using 123/+7.5 m benchmark	Rendezvous Hill Terrace	Palmata rudstone (reef crest)	Yes
2185	1	Coral		Yes	Mass spectrometer	Yes	Yes	Blanchon and Eisenhauer, 2001 Chutcharavan and Dutton, 2020		BL01-006	BL01-006-001	PB20-03	2001-01-01	No	Single analysis; outside acceptable range for initial uranium isotopic composition (delta 234Ui = 149 ± 2 per mil)	No	Single analysis; outside acceptable range for initial uranium isotopic composition (delta 234Ui = 145 +7/-5 per mil)	Chutcharavan and Dutton, 2020	Flexible protocol	No	Single analysis; outside acceptable range for initial uranium isotopic composition (delta 234Ui = 145 +/- 5 per mil)	Chutcharavan and Dutton, 2020	Strict protocol	Barbados	Barbados, West Indies	South coast, Gibbons transect	13.0644	-59.52	N/A	N/A	Yes		Mean Sea Level / General definition	Not reported	20.45	Not Reported	20.45	3	20.75	mllw elevation calculated using tidal data from Bridgetown, Barbados from Admiralty Tide Tables (2016), v. 2; elevation uncertainty used from Dutton and Lambeck 2015	Uplifting	0.232558	Not Reported	0.239837	0.0530652	highest elevation in LIG terrace = 37 m, using 123/+7.5 m benchmark	Rendezvous Hill Terrace	Palmata rudstone (reef crest)	Yes
2186	1	Coral		Yes	Mass spectrometer	Yes	Yes	Blanchon and Eisenhauer, 2001 Chutcharavan and Dutton, 2020		BL01-007	BL01-007-001	PB20-10	2001-01-01	No	Single analysis; outside acceptable range for initial uranium isotopic composition (delta 234Ui = 149 ± 2 per mil)	No	Single analysis; calcite content >= 2 %; outside acceptable range for initial uranium isotopic composition (delta 234Ui = 145 +7/-5 per mil)	Chutcharavan and Dutton, 2020	Flexible protocol	No	Single analysis; calcite content >= 2 %; outside acceptable range for initial uranium isotopic composition (delta 234Ui = 145 +/- 5 per mil)	Chutcharavan and Dutton, 2020	Strict protocol	Barbados	Barbados, West Indies	South coast, Gibbons transect	13.0644	-59.52	N/A	N/A	Yes		Mean Sea Level / General definition	Not reported	31.25	Not Reported	31.25	3	31.55	mllw elevation calculated using tidal data from Bridgetown, Barbados from Admiralty Tide Tables (2016), v. 2; elevation uncertainty used from Dutton and Lambeck 2021	Uplifting	0.232558	Not Reported	0.239837	0.0530652	highest elevation in LIG terrace = 37 m, using 123/+7.5 m benchmark	Rendezvous Hill Terrace	Palmata rudstone (reef crest)	Yes
2187	1	Coral		Yes	Mass spectrometer	Yes	Yes	Blanchon and Eisenhauer, 2001 Chutcharavan and Dutton, 2020		BL01-008	BL01-008-001	PB20-06	2001-01-01	Yes		Yes		Chutcharavan and Dutton, 2020	Flexible protocol	Yes		Chutcharavan and Dutton, 2020	Strict protocol	Barbados	Barbados, West Indies	South coast, Gibbons transect	13.0644	-59.52	N/A	N/A	Yes		Mean Sea Level / General definition	Not reported	25.7	Not Reported	25.7	3	26	mllw elevation calculated using tidal data from Bridgetown, Barbados from Admiralty Tide Tables (2016), v. 2; elevation uncertainty used from Dutton and Lambeck 2017	Uplifting	0.232558	Not Reported	0.239837	0.0530652	highest elevation in LIG terrace = 37 m, using 123/+7.5 m benchmark	Rendezvous Hill Terrace	Palmata rudstone (reef crest)	Yes
2188	1	Coral		Yes	Mass spectrometer	Yes	Yes	Blanchon and Eisenhauer, 2001 Chutcharavan and Dutton, 2020		BL01-009	BL01-009-001	PB20-02	2001-01-01	No	Single analysis; outside acceptable range for initial uranium isotopic composition (delta 234Ui = 149 ± 2 per mil)	No	Single analysis; 232Th concentration > 2 ppb; outside acceptable range for initial uranium isotopic composition (delta 234Ui = 145 +7/-5 per mil)	Chutcharavan and Dutton, 2020	Flexible protocol	No	Single analysis; calcite content >= 2 %; outside acceptable range for initial uranium isotopic composition (delta 234Ui = 145 +/- 5 per mil)	Chutcharavan and Dutton, 2020	Strict protocol	Barbados	Barbados, West Indies	South coast, Gibbons transect	13.0644	-59.52	N/A	N/A	Yes		Mean Sea Level / General definition	Not reported	18.95	Not Reported	18.95	3	19.25	mllw elevation calculated using tidal data from Bridgetown, Barbados from Admiralty Tide Tables (2016), v. 2; elevation uncertainty used from Dutton and Lambeck 2014	Uplifting	0.232558	Not Reported	0.239837	0.0530652	highest elevation in LIG terrace = 37 m, using 123/+7.5 m benchmark	Rendezvous Hill Terrace	Palmata rudstone (reef crest)	Yes
2189	1	Coral		Yes	Mass spectrometer	Yes	Yes	Blanchon and Eisenhauer, 2001 Chutcharavan and Dutton, 2020		BL01-010	BL01-010-001	PB10-05	2001-01-01	No	Single analysis; outside acceptable range for initial uranium isotopic composition (delta 234Ui = 149 ± 2 per mil)	No	Single analysis; outside acceptable range for initial uranium isotopic composition (delta 234Ui = 145 +7/-5 per mil)	Chutcharavan and Dutton, 2020	Flexible protocol	No	Single analysis; outside acceptable range for initial uranium isotopic composition (delta 234Ui = 145 +/- 5 per mil)	Chutcharavan and Dutton, 2020	Strict protocol	Barbados	Barbados, West Indies	South Coast, Erol Barrow transect	13.0771	-59.5684	N/A	N/A	Yes		Mean Sea Level / General definition	Not reported	39.25	Not Reported	39.25	3	39.55	mllw elevation calculated using tidal data from Bridgetown, Barbados from Admiralty Tide Tables (2016), v. 2; elevation uncertainty used from Dutton and Lambeck 2012	Uplifting	0.232558	Not Reported	0.239837	0.0530652	highest elevation in LIG terrace = 37 m, using 123/+7.5 m benchmark	Rendezvous Hill Terrace	Mixed framestone (reef front)	Yes
1479	1	Coral		Yes	Mass Spectrometer	Yes	Yes	Blanchon et al., 2009 Chutcharavan and Dutton, 2020		BL09-003	BL09-003-001	xD4-2a	2009-01-01	Yes		No	Multiple analyses of the same coral; subsample ages do not overlap within analytical uncertainty and may be part of diagenetic array	Chutcharavan and Dutton, 2020	Flexible protocol	No	Multiple analyses of the same coral; subsample ages not rproducible and may be part of diagenetic array	Chutcharavan and Dutton, 2020	Strict protocol	Mexico - Yucatan	Xcaret	Upper reef tract	20.5799	-87.1191	N/A	N/A	Yes		Mean Sea Level / General definition	Not reported	4.7	0.15	4.7	1	4.8	mlws elevation calculated using data for Cozumel from Nautical Map 28196, Isla Cozumel; used +/- 1 m uncertainty because reported elevation uncertainty only accounts for tidal amplitude	Stable							reef crest-colony	Yes
1480	1	Coral		Yes	Mass Spectrometer	Yes	Yes	Blanchon et al., 2009 Chutcharavan and Dutton, 2020		BL09-003	BL09-003-002	xD4-2b	2009-01-01	No	Multiple analyses of same coral; this subsample outside "strictly reliable" range for initial uranium isotopic composition (delta 234Ui = 146.6 to 149.6 per mil)	No	Multiple analyses of the same coral; subsample ages do not overlap within analytical uncertainty and may be part of diagenetic array	Chutcharavan and Dutton, 2020	Flexible protocol	No	Multiple analyses of the same coral; subsample ages not rproducible and may be part of diagenetic array	Chutcharavan and Dutton, 2020	Strict protocol	Mexico - Yucatan	Xcaret	Upper reef tract	20.5799	-87.1191	N/A	N/A	Yes		Mean Sea Level / General definition	Not reported	4.7	0.15	4.7	1	4.8	mlws elevation calculated using data for Cozumel from Nautical Map 28196, Isla Cozumel; used +/- 1 m uncertainty because reported elevation uncertainty only accounts for tidal amplitude	Stable							reef crest-colony	Yes
1481	1	Coral		Yes	Mass Spectrometer	Yes	Yes	Blanchon et al., 2009 Chutcharavan and Dutton, 2020		BL09-003	BL09-003-003	xD4-2c	2009-01-01	No	Multiple analyses of same coral; this subsample outside "strictly reliable" range for initial uranium isotopic composition (delta 234Ui = 146.6 to 149.6 per mil)	No	Multiple analyses of the same coral; subsample ages do not overlap within analytical uncertainty and may be part of diagenetic array	Chutcharavan and Dutton, 2020	Flexible protocol	No	Multiple analyses of the same coral; subsample ages not rproducible and may be part of diagenetic array	Chutcharavan and Dutton, 2020	Strict protocol	Mexico - Yucatan	Xcaret	Upper reef tract	20.5799	-87.1191	N/A	N/A	Yes		Mean Sea Level / General definition	Not reported	4.7	0.15	4.7	1	4.8	mlws elevation calculated using data for Cozumel from Nautical Map 28196, Isla Cozumel; used +/- 1 m uncertainty because reported elevation uncertainty only accounts for tidal amplitude	Stable							reef crest-colony	Yes
1482	1	Coral		Yes	Mass Spectrometer	Yes	Yes	Blanchon et al., 2009 Chutcharavan and Dutton, 2020		BL09-004	BL09-004-001	xE2-2a	2009-01-01	No	Multiple analyses of same coral; this subsample outside "strictly reliable" range for initial uranium isotopic composition (delta 234Ui = 146.6 to 149.6 per mil)	No	Multiple analyses of the same coral; this subsample rejected because could be part of diagenetic array	Chutcharavan and Dutton, 2020	Flexible protocol	No	Multiple analyses of the same coral; this subsample outside acceptable range for initial uranium isotopic composition (delta 234Ui = 145 +/- 5 per mil)	Chutcharavan and Dutton, 2020	Strict protocol	Mexico - Yucatan	Xcaret	Upper reef tract	20.5799	-87.1191	N/A	N/A	Yes		Mean Sea Level / General definition	Not reported	4	0.15	4	1	4.1	mlws elevation calculated using data for Cozumel from Nautical Map 28196, Isla Cozumel; used +/- 1 m uncertainty because reported elevation uncertainty only accounts for tidal amplitude	Stable							reef crest-colony	Yes
1483	1	Coral		Yes	Mass Spectrometer	Yes	Yes	Blanchon et al., 2009 Chutcharavan and Dutton, 2020		BL09-004	BL09-004-002	xE2-2c	2009-01-01	No	Multiple analyses of same coral; this subsample outside "strictly reliable" range for initial uranium isotopic composition (delta 234Ui = 146.6 to 149.6 per mil)	No	Multiple analyses of the same coral; this subsample outside acceptable range for initial uranium isotopic composition (delta 234Ui = 145 +7/-5 per mil)	Chutcharavan and Dutton, 2020	Flexible protocol	No	Multiple analyses of the same coral; this subsample outside acceptable range for initial uranium isotopic composition (delta 234Ui = 145 +/- 5 per mil)	Chutcharavan and Dutton, 2020	Strict protocol	Mexico - Yucatan	Xcaret	Upper reef tract	20.5799	-87.1191	N/A	N/A	Yes		Mean Sea Level / General definition	Not reported	4	0.15	4	1	4.1	mlws elevation calculated using data for Cozumel from Nautical Map 28196, Isla Cozumel; used +/- 1 m uncertainty because reported elevation uncertainty only accounts for tidal amplitude	Stable							reef crest-colony	Yes
1484	1	Coral		Yes	Mass Spectrometer	Yes	Yes	Blanchon et al., 2009 Chutcharavan and Dutton, 2020		BL09-004	BL09-004-003	xE2-2b	2009-01-01	No	Multiple analyses of same coral; this subsample outside "strictly reliable" range for initial uranium isotopic composition (delta 234Ui = 146.6 to 149.6 per mil)	No	Multiple analyses of the same coral; this subsample outside acceptable range for initial uranium isotopic composition (delta 234Ui = 145 +7/-5 per mil)	Chutcharavan and Dutton, 2020	Flexible protocol	No	Multiple analyses of the same coral; this subsample outside acceptable range for initial uranium isotopic composition (delta 234Ui = 145 +/- 5 per mil)	Chutcharavan and Dutton, 2020	Strict protocol	Mexico - Yucatan	Xcaret	Upper reef tract	20.5799	-87.1191	N/A	N/A	Yes		Mean Sea Level / General definition	Not reported	4	0.15	4	1	4.1	mlws elevation calculated using data for Cozumel from Nautical Map 28196, Isla Cozumel; used +/- 1 m uncertainty because reported elevation uncertainty only accounts for tidal amplitude	Stable							reef crest-colony	Yes
1485	1	Coral		Yes	Mass Spectrometer	Yes	Yes	Blanchon et al., 2009 Chutcharavan and Dutton, 2020		BL09-005	BL09-005-001	xD4-3a	2009-01-01	Yes		No	Multiple analyses of the same coral; subsample ages do not overlap within analytical uncertainty	Chutcharavan and Dutton, 2020	Flexible protocol	No	Multiple analyses of the same coral; subsample ages not reproducible	Chutcharavan and Dutton, 2020	Strict protocol	Mexico - Yucatan	Xcaret	Upper reef tract	20.5799	-87.1191	N/A	N/A	Yes		Mean Sea Level / General definition	Not reported	4.9	0.15	4.9	1	5	mlws elevation calculated using data for Cozumel from Nautical Map 28196, Isla Cozumel; used +/- 1 m uncertainty because reported elevation uncertainty only accounts for tidal amplitude	Stable							reef crest-colony	Yes
1486	1	Coral		Yes	Mass Spectrometer	Yes	Yes	Blanchon et al., 2009 Chutcharavan and Dutton, 2020		BL09-005	BL09-005-002	xD4-3c	2009-01-01	No	Multiple analyses of same coral; this subsample outside "strictly reliable" range for initial uranium isotopic composition (delta 234Ui = 146.6 to 149.6 per mil)	No	Multiple analyses of the same coral; subsample ages do not overlap within analytical uncertainty	Chutcharavan and Dutton, 2020	Flexible protocol	No	Multiple analyses of the same coral; subsample ages not reproducible	Chutcharavan and Dutton, 2020	Strict protocol	Mexico - Yucatan	Xcaret	Upper reef tract	20.5799	-87.1191	N/A	N/A	Yes		Mean Sea Level / General definition	Not reported	4.9	0.15	4.9	1	5	mlws elevation calculated using data for Cozumel from Nautical Map 28196, Isla Cozumel; used +/- 1 m uncertainty because reported elevation uncertainty only accounts for tidal amplitude	Stable							reef crest-colony	Yes
1487	1	Coral		Yes	Mass Spectrometer	Yes	Yes	Blanchon et al., 2009 Chutcharavan and Dutton, 2020		BL09-005	BL09-005-003	xD4-3b	2009-01-01	No	Multiple analyses of same coral; this subsample outside "strictly reliable" range for initial uranium isotopic composition (delta 234Ui = 146.6 to 149.6 per mil)	No	Multiple analyses of the same coral; subsample ages do not overlap within analytical uncertainty	Chutcharavan and Dutton, 2020	Flexible protocol	No	Multiple analyses of the same coral; subsample ages not reproducible	Chutcharavan and Dutton, 2020	Strict protocol	Mexico - Yucatan	Xcaret	Upper reef tract	20.5799	-87.1191	N/A	N/A	Yes		Mean Sea Level / General definition	Not reported	4.9	0.15	4.9	1	5	mlws elevation calculated using data for Cozumel from Nautical Map 28196, Isla Cozumel; used +/- 1 m uncertainty because reported elevation uncertainty only accounts for tidal amplitude	Stable							reef crest-colony	Yes
1491	1	Coral		Yes	Mass Spectrometer	Yes	Yes	Blanchon et al., 2009 Chutcharavan and Dutton, 2020		BL09-007	BL09-007-001	xA4-2b	2009-01-01	Yes		No	Multiple analyses of the same coral; subsample ages not reproducible	Chutcharavan and Dutton, 2020	Flexible protocol	No	Multiple analyses of the same coral; subsample ages not reproducible	Chutcharavan and Dutton, 2020	Strict protocol	Mexico - Yucatan	Xcaret	Lower reef tract	20.5799	-87.1191	N/A	N/A	Yes		Mean Sea Level / General definition	Not reported	2.2	0.15	2.2	1	2.3	mlws elevation calculated using data for Cozumel from Nautical Map 28196, Isla Cozumel; used +/- 1 m uncertainty because reported elevation uncertainty only accounts for tidal amplitude	Stable							reef crest-colony	Yes
1492	1	Coral		Yes	Mass Spectrometer	Yes	Yes	Blanchon et al., 2009 Chutcharavan and Dutton, 2020		BL09-007	BL09-007-002	xA4-2c	2009-01-01	Yes		No	Multiple analyses of the same coral; subsample ages not reproducible	Chutcharavan and Dutton, 2020	Flexible protocol	No	Multiple analyses of the same coral; subsample ages not reproducible	Chutcharavan and Dutton, 2020	Strict protocol	Mexico - Yucatan	Xcaret	Lower reef tract	20.5799	-87.1191	N/A	N/A	Yes		Mean Sea Level / General definition	Not reported	2.2	0.15	2.2	1	2.3	mlws elevation calculated using data for Cozumel from Nautical Map 28196, Isla Cozumel; used +/- 1 m uncertainty because reported elevation uncertainty only accounts for tidal amplitude	Stable							reef crest-colony	Yes
1493	1	Coral		Yes	Mass Spectrometer	Yes	Yes	Blanchon et al., 2009 Chutcharavan and Dutton, 2020		BL09-007	BL09-007-003	xA4-2a	2009-01-01	No	Multiple analyses of same coral; this subsample outside "strictly reliable" range for initial uranium isotopic composition (delta 234Ui = 146.6 to 149.6 per mil)	No	Multiple analyses of the same coral; subsample ages not reproducible	Chutcharavan and Dutton, 2020	Flexible protocol	No	Multiple analyses of the same coral; subsample ages not reproducible	Chutcharavan and Dutton, 2020	Strict protocol	Mexico - Yucatan	Xcaret	Lower reef tract	20.5799	-87.1191	N/A	N/A	Yes		Mean Sea Level / General definition	Not reported	2.2	0.15	2.2	1	2.3	mlws elevation calculated using data for Cozumel from Nautical Map 28196, Isla Cozumel; used +/- 1 m uncertainty because reported elevation uncertainty only accounts for tidal amplitude	Stable							reef crest-colony	Yes
1497	1	Coral		Yes	Mass Spectrometer	Yes	Yes	Blanchon et al., 2009 Chutcharavan and Dutton, 2020		BL09-009	BL09-009-001	xC7-5b	2009-01-01	No	Multiple analyses of same coral; this subsample outside "strictly reliable" range for initial uranium isotopic composition (delta 234Ui = 146.6 to 149.6 per mil)	No	Multiple analyses of the same coral; this subsample outside acceptable range for initial uranium isotopic composition (delta 234Ui = 145 +7/-5 per mil)	Chutcharavan and Dutton, 2020	Flexible protocol	No	Multiple analyses of the same coral; this subsample outside acceptable range for initial uranium isotopic composition (delta 234Ui = 145 +/- 5 per mil)	Chutcharavan and Dutton, 2020	Strict protocol	Mexico - Yucatan	Xcaret	Lower reef tract	20.5799	-87.1191	N/A	N/A	Yes		Mean Sea Level / General definition	Not reported	1	0.15	1	1	1.1	mlws elevation calculated using data for Cozumel from Nautical Map 28196, Isla Cozumel; used +/- 1 m uncertainty because reported elevation uncertainty only accounts for tidal amplitude	Stable							reef lagoon - colony	Yes
1498	1	Coral		Yes	Mass Spectrometer	Yes	Yes	Blanchon et al., 2009 Chutcharavan and Dutton, 2020		BL09-009	BL09-009-002	xC7-5c	2009-01-01	No	Multiple analyses of same coral; this subsample outside "strictly reliable" range for initial uranium isotopic composition (delta 234Ui = 146.6 to 149.6 per mil)	No	Multiple analyses of the same coral; this subsample outside acceptable range for initial uranium isotopic composition (delta 234Ui = 145 +7/-5 per mil)	Chutcharavan and Dutton, 2020	Flexible protocol	No	Multiple analyses of the same coral; this subsample outside acceptable range for initial uranium isotopic composition (delta 234Ui = 145 +/- 5 per mil)	Chutcharavan and Dutton, 2020	Strict protocol	Mexico - Yucatan	Xcaret	Lower reef tract	20.5799	-87.1191	N/A	N/A	Yes		Mean Sea Level / General definition	Not reported	1	0.15	1	1	1.1	mlws elevation calculated using data for Cozumel from Nautical Map 28196, Isla Cozumel; used +/- 1 m uncertainty because reported elevation uncertainty only accounts for tidal amplitude	Stable							reef lagoon - colony	Yes
1499	1	Coral		Yes	Mass Spectrometer	Yes	Yes	Blanchon et al., 2009 Chutcharavan and Dutton, 2020		BL09-009	BL09-009-003	xC7-5a	2009-01-01	No	Multiple analyses of same coral; this subsample outside "strictly reliable" range for initial uranium isotopic composition (delta 234Ui = 146.6 to 149.6 per mil)	No	Multiple analyses of the same coral; this subsample outside acceptable range for initial uranium isotopic composition (delta 234Ui = 145 +7/-5 per mil)	Chutcharavan and Dutton, 2020	Flexible protocol	No	Multiple analyses of the same coral; this subsample outside acceptable range for initial uranium isotopic composition (delta 234Ui = 145 +/- 5 per mil)	Chutcharavan and Dutton, 2020	Strict protocol	Mexico - Yucatan	Xcaret	Lower reef tract	20.5799	-87.1191	N/A	N/A	Yes		Mean Sea Level / General definition	Not reported	1	0.15	1	1	1.1	mlws elevation calculated using data for Cozumel from Nautical Map 28196, Isla Cozumel; used +/- 1 m uncertainty because reported elevation uncertainty only accounts for tidal amplitude	Stable							reef lagoon - colony	Yes
1500	1	Coral		Yes	Mass Spectrometer	Yes	Yes	Blanchon et al., 2009 Chutcharavan and Dutton, 2020		BL09-010	BL09-010-001	xC7-2a	2009-01-01	No	Multiple analyses of same coral; this subsample outside "strictly reliable" range for initial uranium isotopic composition (delta 234Ui = 146.6 to 149.6 per mil)	No	Multiple analyses of the same coral; this subsample outside acceptable range for initial uranium isotopic composition (delta 234Ui = 145 +7/-5 per mil)	Chutcharavan and Dutton, 2020	Flexible protocol	No	Multiple analyses of the same coral; this subsample outside acceptable range for initial uranium isotopic composition (delta 234Ui = 145 +/- 5 per mil)	Chutcharavan and Dutton, 2020	Strict protocol	Mexico - Yucatan	Xcaret	Lower reef tract	20.5799	-87.1191	N/A	N/A	Yes		Mean Sea Level / General definition	Not reported	1.7	0.15	1.7	1	1.8	mlws elevation calculated using data for Cozumel from Nautical Map 28196, Isla Cozumel; used +/- 1 m uncertainty because reported elevation uncertainty only accounts for tidal amplitude	Stable							reef lagoon - colony	Yes
1501	1	Coral		Yes	Mass Spectrometer	Yes	Yes	Blanchon et al., 2009 Chutcharavan and Dutton, 2020		BL09-010	BL09-010-002	xC7-2c	2009-01-01	No	Multiple analyses of same coral; this subsample outside "strictly reliable" range for initial uranium isotopic composition (delta 234Ui = 146.6 to 149.6 per mil)	No	Multiple analyses of the same coral; this subsample outside acceptable range for initial uranium isotopic composition (delta 234Ui = 145 +7/-5 per mil)	Chutcharavan and Dutton, 2020	Flexible protocol	No	Multiple analyses of the same coral; this subsample outside acceptable range for initial uranium isotopic composition (delta 234Ui = 145 +/- 5 per mil)	Chutcharavan and Dutton, 2020	Strict protocol	Mexico - Yucatan	Xcaret	Lower reef crest	20.5799	-87.1191	N/A	N/A	Yes		Mean Sea Level / General definition	Not reported	1.7	0.15	1.7	1	1.8	mlws elevation calculated using data for Cozumel from Nautical Map 28196, Isla Cozumel; used +/- 1 m uncertainty because reported elevation uncertainty only accounts for tidal amplitude	Stable							reef lagoon - colony	Yes
1502	1	Coral		Yes	Mass Spectrometer	Yes	Yes	Blanchon et al., 2009 Chutcharavan and Dutton, 2020		BL09-010	BL09-010-003	xC7-2b	2009-01-01	No	Multiple analyses of same coral; this subsample outside "strictly reliable" range for initial uranium isotopic composition (delta 234Ui = 146.6 to 149.6 per mil)	No	Multiple analyses of the same coral; this subsample outside acceptable range for initial uranium isotopic composition (delta 234Ui = 145 +7/-5 per mil)	Chutcharavan and Dutton, 2020	Flexible protocol	No	Multiple analyses of the same coral; this subsample outside acceptable range for initial uranium isotopic composition (delta 234Ui = 145 +/- 5 per mil)	Chutcharavan and Dutton, 2020	Strict protocol	Mexico - Yucatan	Xcaret	Lower reef tract	20.5799	-87.1191	N/A	N/A	Yes		Mean Sea Level / General definition	Not reported	1.7	0.15	1.7	1	1.8	mlws elevation calculated using data for Cozumel from Nautical Map 28196, Isla Cozumel; used +/- 1 m uncertainty because reported elevation uncertainty only accounts for tidal amplitude	Stable							reef lagoon - colony	Yes
1503	1	Coral		Yes	Mass Spectrometer	Yes	Yes	Blanchon et al., 2009 Chutcharavan and Dutton, 2020		BL09-010	BL09-010-004	xC7-2d	2009-01-01	No	Multiple analyses of same coral; this subsample outside "strictly reliable" range for initial uranium isotopic composition (delta 234Ui = 146.6 to 149.6 per mil)	No	Multiple analyses of the same coral; this subsample outside acceptable range for initial uranium isotopic composition (delta 234Ui = 145 +7/-5 per mil)	Chutcharavan and Dutton, 2020	Flexible protocol	No	Multiple analyses of the same coral; this subsample outside acceptable range for initial uranium isotopic composition (delta 234Ui = 145 +/- 5 per mil)	Chutcharavan and Dutton, 2020	Strict protocol	Mexico - Yucatan	Xcaret	Lower reef tract	20.5799	-87.1191	N/A	N/A	Yes		Mean Sea Level / General definition	Not reported	1.7	0.15	1.7	1	1.8	mlws elevation calculated using data for Cozumel from Nautical Map 28196, Isla Cozumel; used +/- 1 m uncertainty because reported elevation uncertainty only accounts for tidal amplitude	Stable							reef lagoon - colony	Yes
1504	1	Coral		Yes	Mass Spectrometer	Yes	Yes	Blanchon et al., 2009 Chutcharavan and Dutton, 2020		BL09-010	BL09-010-005	xC7-2e	2009-01-01	No	Multiple analyses of same coral; this subsample outside "strictly reliable" range for initial uranium isotopic composition (delta 234Ui = 146.6 to 149.6 per mil)	No	Multiple analyses of the same coral; this subsample outside acceptable range for initial uranium isotopic composition (delta 234Ui = 145 +7/-5 per mil)	Chutcharavan and Dutton, 2020	Flexible protocol	No	Multiple analyses of the same coral; this subsample outside acceptable range for initial uranium isotopic composition (delta 234Ui = 145 +/- 5 per mil)	Chutcharavan and Dutton, 2020	Strict protocol	Mexico - Yucatan	Xcaret	Lower reef tract	20.5799	-87.1191	N/A	N/A	Yes		Mean Sea Level / General definition	Not reported	1.7	0.15	1.7	1	1.8	mlws elevation calculated using data for Cozumel from Nautical Map 28196, Isla Cozumel; used +/- 1 m uncertainty because reported elevation uncertainty only accounts for tidal amplitude	Stable							reef lagoon - colony	Yes
1036	1	Coral		No	Mass Spectrometer	Yes	Yes	Braithwaite et al., 2004 Chutcharavan and Dutton, 2020		BR04-001	BR04-001-001	Ribbon Reef 5	2004-01-01	Yes		No	U-series data not reported so cannot assess sample preservation	Chutcharavan and Dutton, 2020	Flexible protocol	No	No isotope ratios reported, so cannot assess sample preservation	Chutcharavan and Dutton, 2020	Strict protocol	Great Barrier Reef	Northern GBR	Ribbon Reef	-15.3791	145.786	15°22'44.68"S	145°47'8.28"E	No		Mean Sea Level / General definition	Distance from top of drill core	-16.1	Not Reported	-16.1	1		No elevation uncertainty reported, so have arbitrarily assigned elevation uncertainty of +/- 1 m	Stable							cAB	Yes
1245	1	Coral		Yes	Mass Spectrometer	Yes	Yes	Bard et al., 1996 Chutcharavan and Dutton, 2020		BR96-002	BR96-002-001	SBA16	1996-01-01	Yes		No	Single analysis; outside acceptable range for initial uranium isotopic composition (delta 234Ui = 145 +7/-5 per mil)	Chutcharavan and Dutton, 2020	Flexible protocol	No	Single analysis; detrital 232Th content not reported; outside acceptable range for initial uranium isotopic composition (delta 234Ui = 145 +/- 5 per mil)	Chutcharavan and Dutton, 2020	Strict protocol	Indonesia	Sumba Island	Cape Laundi	-9.5	120.2	N/A	N/A	Yes	from Figure 1 in Bard et al., 1996 (GRL)	Mean Low Water Springs	Not reported	15	5	13.91	5	15	elevation uncertainty according to supplementary information from Bard et al., 1996 (GRL). Elevation referred to MSL using the MLLW calculated by IMCalc, Lorscheid and Rovere, 2019	Uplifting	0.2 to 0.5	Not Reported	0.35	0.15	used the mid point of the rate range given in Bard et al., 1996 (GRL)	Reef complex I-2	Lagoonal and/or outer slopes of sheltered reefs	Yes
1246	1	Coral		Yes	Mass Spectrometer	Yes	Yes	Bard et al., 1996 Chutcharavan and Dutton, 2020		BR96-003	BR96-003-001	SBA9	1996-01-01	Yes		Yes		Chutcharavan and Dutton, 2020	Flexible protocol	No	Single analysis; detrital 232Th content not reported	Chutcharavan and Dutton, 2020	Strict protocol	Indonesia	Sumba Island	Cape Laundi	-9.5	120.2	N/A	N/A	Yes	from Figure 1 in Bard et al., 1996 (GRL)	Mean Low Water Springs	Not reported	3	1	1.91	1	3	elevation uncertainty according to supplementary information from Bard et al., 1996 (GRL). Elevation referred to MSL using the MLLW calculated by IMCalc, Lorscheid and Rovere, 2019	Uplifting	0.2 to 0.5	Not Reported	0.35	0.15	used the mid point of the rate range given in Bard et al., 1996 (GRL)	Reef complex I-1	Not Reported	Yes
1247	1	Coral		Yes	Mass Spectrometer	Yes	Yes	Bard et al., 1996 Chutcharavan and Dutton, 2020		BR96-005	BR96-005-001	SBA13	1996-01-01	No	Single analysis, outside acceptable range for initial uranium isotopic composition (delta 234Ui less than or equal to 165 per mil)	No	Single analysis; outside acceptable range for initial uranium isotopic composition (delta 234Ui = 145 +7/-5 per mil)	Chutcharavan and Dutton, 2020	Flexible protocol	No	Single analysis; detrital 232Th content not reported; outside acceptable range for initial uranium isotopic composition (delta 234Ui = 145 +/- 5 per mil)	Chutcharavan and Dutton, 2020	Strict protocol	Indonesia	Sumba Island	Cape Laundi	-9.5	120.2	N/A	N/A	Yes	from Figure 1 in Bard et al., 1996 (GRL)	Mean Low Water Springs	Not reported	3	1	1.91	1	3	elevation uncertainty according to supplementary information from Bard et al., 1996 (GRL). Elevation referred to MSL using the MLLW calculated by IMCalc, Lorscheid and Rovere, 2019	Uplifting	0.2 to 0.5	Not Reported	0.35	0.15	used the mid point of the rate range given in Bard et al., 1996 (GRL)	Reef complex I-1	Not Reported	Yes
1248	1	Coral		Yes	Mass Spectrometer	Yes	Yes	Bard et al., 1996 Chutcharavan and Dutton, 2020		BR96-006	BR96-006-001	SBA23	1996-01-01	No	Single analysis, outside acceptable range for initial uranium isotopic composition (delta 234Ui less than or equal to 165 per mil)	No	Single analysis; calcite content >= 2 %; outside acceptable range for initial uranium isotopic composition (delta 234Ui = 145 +7/-5 per mil)	Chutcharavan and Dutton, 2020	Flexible protocol	No	Single analysis; calcite content >= 2 %; detrital 232Th content > 2 ppb; outside acceptable rang for initial uranium isotopic composition (delta 234Ui = 145 +/- 5 per mil)	Chutcharavan and Dutton, 2020	Strict protocol	Indonesia	Sumba Island	Cape Laundi	-9.5	120.2	N/A	N/A	Yes	from Figure 1 in Bard et al., 1996 (GRL)	Mean Low Water Springs	Not reported	40	5	38.91	5	40	elevation uncertainty according to supplementary information from Bard et al., 1996 (GRL). Elevation referred to MSL using the MLLW calculated by IMCalc, Lorscheid and Rovere, 2019	Uplifting	0.2 to 0.5	Not Reported	0.35	0.15	used the mid point of the rate range given in Bard et al., 1996 (GRL)	Reef complex II-2/3	Not Reported	Yes
1249	1	Coral		Yes	Mass Spectrometer	Yes	Yes	Bard et al., 1996 Chutcharavan and Dutton, 2020		BR96-007	BR96-007-001	SBA14	1996-01-01	Yes		Yes		Chutcharavan and Dutton, 2020	Flexible protocol	No	Single analysis; detrital 232Th content not reported	Chutcharavan and Dutton, 2020	Strict protocol	Indonesia	Sumba Island	Cape Laundi	-9.5	120.2	N/A	N/A	Yes	from Figure 1 in Bard et al., 1996 (GRL)	Mean Low Water Springs	Not reported	3	1	1.91	1	3	elevation uncertainty according to supplementary information from Bard et al., 1996 (GRL). Elevation referred to MSL using the MLLW calculated by IMCalc, Lorscheid and Rovere, 2019	Uplifting	0.2 to 0.5	Not Reported	0.35	0.15	used the mid point of the rate range given in Bard et al., 1996 (GRL)	Reef complex I-2	Not Reported	Yes
1250	1	Coral		Yes	Mass Spectrometer	Yes	Yes	Bard et al., 1996 Chutcharavan and Dutton, 2020		BR96-008	BR96-008-001	SBA10	1996-01-01	Yes		Yes		Chutcharavan and Dutton, 2020	Flexible protocol	No	Single analysis; detrital 232Th content not reported	Chutcharavan and Dutton, 2020	Strict protocol	Indonesia	Sumba Island	Cape Laundi	-9.5	120.2	N/A	N/A	Yes	from Figure 1 in Bard et al., 1996 (GRL)	Mean Low Water Springs	Not reported	3	1	1.91	1	3	elevation uncertainty according to supplementary information from Bard et al., 1996 (GRL). Elevation referred to MSL using the MLLW calculated by IMCalc, Lorscheid and Rovere, 2019	Uplifting	0.2 to 0.5	Not Reported	0.35	0.15	used the mid point of the rate range given in Bard et al., 1996 (GRL)	Reef complex I-1	Not Reported	Yes
1251	1	Coral		Yes	Mass Spectrometer	Yes	Yes	Bard et al., 1996 Chutcharavan and Dutton, 2020		BR96-009	BR96-009-001	SBA11	1996-01-01	No	Single analysis, outside acceptable range for initial uranium isotopic composition (delta 234Ui less than or equal to 165 per mil)	No	Single analysis; outside acceptable range for initial uranium isotopic composition (delta 234Ui = 145 +7/-5 per mil)	Chutcharavan and Dutton, 2020	Flexible protocol	No	Single analysis; detrital 232Th content not reported; outside acceptable range for initial uranium isotopic composition (delta 234Ui = 145 +/- 5 per mil)	Chutcharavan and Dutton, 2020	Strict protocol	Indonesia	Sumba Island	Cape Laundi	-9.5	120.2	N/A	N/A	Yes	from Figure 1 in Bard et al., 1996 (GRL)	Mean Low Water Springs	Not reported	3	1	1.91	1	3	elevation uncertainty according to supplementary information from Bard et al., 1996 (GRL). Elevation referred to MSL using the MLLW calculated by IMCalc, Lorscheid and Rovere, 2019	Uplifting	0.2 to 0.5	Not Reported	0.35	0.15	used the mid point of the rate range given in Bard et al., 1996 (GRL)	Reef complex I-1	Not Reported	Yes
1252	1	Coral		Yes	Mass Spectrometer	Yes	Yes	Bard et al., 1996 Chutcharavan and Dutton, 2020		BR96-011	BR96-011-001	SBA19	1996-01-01	No	Single analysis, outside acceptable range for initial uranium isotopic composition (delta 234Ui less than or equal to 165 per mil)	No	Single analysis; outside acceptable range for initial uranium isotopic composition (delta 234Ui = 145 +7/-5 per mil)	Chutcharavan and Dutton, 2020	Flexible protocol	No	Single analysis; detrital 232Th content not reported; outside acceptable range for initial uranium isotopic composition (delta 234Ui = 145 +/- 5 per mil)	Chutcharavan and Dutton, 2020	Strict protocol	Indonesia	Sumba Island	Cape Laundi	-9.5	120.2	N/A	N/A	Yes	from Figure 1 in Bard et al., 1996 (GRL)	Mean Low Water Springs	Not reported	10	5	8.91	5	10	elevation uncertainty according to supplementary information from Bard et al., 1996 (GRL). Elevation referred to MSL using the MLLW calculated by IMCalc, Lorscheid and Rovere, 2019	Uplifting	0.2 to 0.5	Not Reported	0.35	0.15	used the mid point of the rate range given in Bard et al., 1996 (GRL)	Reef complex I-2	Lagoonal and/or outer slopes of sheltered reefs	Yes
1253	1	Coral		Yes	Mass Spectrometer	Yes	Yes	Bard et al., 1996 Chutcharavan and Dutton, 2020		BR96-012	BR96-012-001	SBA15	1996-01-01	Yes		Yes		Chutcharavan and Dutton, 2020	Flexible protocol	No	Single analysis; detrital 232Th content not reported	Chutcharavan and Dutton, 2020	Strict protocol	Indonesia	Sumba Island	Cape Laundi	-9.5	120.2	N/A	N/A	Yes	from Figure 1 in Bard et al., 1996 (GRL)	Mean Low Water Springs	Not reported	3	1	1.91	1	3	elevation uncertainty according to supplementary information from Bard et al., 1996 (GRL). Elevation referred to MSL using the MLLW calculated by IMCalc, Lorscheid and Rovere, 2019	Uplifting	0.2 to 0.5	Not Reported	0.35	0.15	used the mid point of the rate range given in Bard et al., 1996 (GRL)	Reef complex I-2	Not Reported	Yes
1254	1	Coral		Yes	Mass Spectrometer	Yes	Yes	Bard et al., 1996 Chutcharavan and Dutton, 2020		BR96-013	BR96-013-001	SBA21	1996-01-01	No	Single analysis, outside acceptable range for initial uranium isotopic composition (delta 234Ui less than or equal to 165 per mil)	No	Single analysis; outside acceptable range for initial uranium isotopic composition (delta 234Ui = 145 +7/-5 per mil)	Chutcharavan and Dutton, 2020	Flexible protocol	No	Single analysis; detrital 232Th content not reported; outside acceptable range for initial uranium isotopic composition (delta 234Ui = 145 +/- 5 per mil)	Chutcharavan and Dutton, 2020	Strict protocol	Indonesia	Sumba Island	Cape Laundi	-9.5	120.2	N/A	N/A	Yes	from Figure 1 in Bard et al., 1996 (GRL)	Mean Low Water Springs	Not reported	10	5	8.91	5	10	elevation uncertainty according to supplementary information from Bard et al., 1996 (GRL). Elevation referred to MSL using the MLLW calculated by IMCalc, Lorscheid and Rovere, 2019	Uplifting	0.2 to 0.5	Not Reported	0.35	0.15	used the mid point of the rate range given in Bard et al., 1996 (GRL)	Reef complex I-2	Lagoonal and/or outer slopes of sheltered reefs	Yes
1255	1	Coral		Yes	Mass Spectrometer	Yes	Yes	Bard et al., 1996 Chutcharavan and Dutton, 2020		BR96-014	BR96-014-001	SBA18	1996-01-01	No	Single analysis, outside acceptable range for initial uranium isotopic composition (delta 234Ui less than or equal to 165 per mil)	No	Single analysis; outside acceptable range for initial uranium isotopic composition (delta 234Ui = 145 +7/-5 per mil)	Chutcharavan and Dutton, 2020	Flexible protocol	No	Single analysis; detrital 232Th content not reported; outside acceptable range for initial uranium isotopic composition (delta 234Ui = 145 +/- 5 per mil)	Chutcharavan and Dutton, 2020	Strict protocol	Indonesia	Sumba Island	Cape Laundi	-9.5	120.2	N/A	N/A	Yes	from Figure 1 in Bard et al., 1996 (GRL)	Mean Low Water Springs	Not reported	10	5	8.91	5	10	elevation uncertainty according to supplementary information from Bard et al., 1996 (GRL). Elevation referred to MSL using the MLLW calculated by IMCalc, Lorscheid and Rovere, 2019	Uplifting	0.2 to 0.5	Not Reported	0.35	0.15	used the mid point of the rate range given in Bard et al., 1996 (GRL)	Reef complex I-2	Lagoonal and/or outer slopes of sheltered reefs	Yes
1256	1	Coral		Yes	Mass Spectrometer	Yes	Yes	Bard et al., 1996 Chutcharavan and Dutton, 2020		BR96-015	BR96-015-001	SBA20	1996-01-01	No	Single analysis, outside acceptable range for initial uranium isotopic composition (delta 234Ui less than or equal to 165 per mil)	No	Single analysis; outside acceptable range for initial uranium isotopic composition (delta 234Ui = 145 +7/-5 per mil)	Chutcharavan and Dutton, 2020	Flexible protocol	No	Single analysis; detrital 232Th content not reported; outside acceptable range for initial uranium isotopic composition (delta 234Ui = 145 +/- 5 per mil)	Chutcharavan and Dutton, 2020	Strict protocol	Indonesia	Sumba Island	Cape Laundi	-9.5	120.2	N/A	N/A	Yes	from Figure 1 in Bard et al., 1996 (GRL)	Mean Low Water Springs	Not reported	10	5	8.91	5	10	elevation uncertainty according to supplementary information from Bard et al., 1996 (GRL). Elevation referred to MSL using the MLLW calculated by IMCalc, Lorscheid and Rovere, 2019	Uplifting	0.2 to 0.5	Not Reported	0.35	0.15	used the mid point of the rate range given in Bard et al., 1996 (GRL)	Reef complex I-2	Lagoonal and/or outer slopes of sheltered reefs	Yes
1257	1	Coral		Yes	Mass Spectrometer	Yes	Yes	Bard et al., 1996 Chutcharavan and Dutton, 2020		BR96-016	BR96-016-001	SBA17	1996-01-01	Yes		Yes		Chutcharavan and Dutton, 2020	Flexible protocol	No	Single analysis; detrital 232Th content not reported	Chutcharavan and Dutton, 2020	Strict protocol	Indonesia	Sumba Island	Cape Laundi	-9.5	120.2	N/A	N/A	Yes	from Figure 1 in Bard et al., 1996 (GRL)	Mean Low Water Springs	Not reported	15	5	13.91	5	15	elevation uncertainty according to supplementary information from Bard et al., 1996 (GRL). Elevation referred to MSL using the MLLW calculated by IMCalc, Lorscheid and Rovere, 2019	Uplifting	0.2 to 0.5	Not Reported	0.35	0.15	used the mid point of the rate range given in Bard et al., 1996 (GRL)	Reef complex I-2	Lagoonal and/or outer slopes of sheltered reefs	Yes
1258	1	Coral		Yes	Mass Spectrometer	Yes	Yes	Bard et al., 1996 Chutcharavan and Dutton, 2020		BR96-017	BR96-017-001	SBA12	1996-01-01	Yes		Yes		Chutcharavan and Dutton, 2020	Flexible protocol	No	Single analysis; detrital 232Th content not reported	Chutcharavan and Dutton, 2020	Strict protocol	Indonesia	Sumba Island	Cape Laundi	-9.5	120.2	N/A	N/A	Yes	from Figure 1 in Bard et al., 1996 (GRL)	Mean Low Water Springs	Not reported	3	1	1.91	1	3	elevation uncertainty according to supplementary information from Bard et al., 1996 (GRL). Elevation referred to MSL using the MLLW calculated by IMCalc, Lorscheid and Rovere, 2019	Uplifting	0.2 to 0.5	Not Reported	0.35	0.15	used the mid point of the rate range given in Bard et al., 1996 (GRL)	Reef complex I-1	Not Reported	Yes
1259	1	Coral		Yes	Mass Spectrometer	Yes	Yes	Bard et al., 1996 Chutcharavan and Dutton, 2020		BR96-018	BR96-018-001	SBA22	1996-01-01	Yes		No	Single analysis; calcite content >= 2 %; outside acceptable range for initial uranium isotopic composition (delta 234Ui = 145 +7/-5 per mil)	Chutcharavan and Dutton, 2020	Flexible protocol	No	Single analysis; calcite content >= 2 %; detrital 232Th content > 2 ppb; outside acceptable rang for initial uranium isotopic composition (delta 234Ui = 145 +/- 5 per mil)	Chutcharavan and Dutton, 2020	Strict protocol	Indonesia	Sumba Island	Cape Laundi	-9.5	120.2	N/A	N/A	Yes	from Figure 1 in Bard et al., 1996 (GRL)	Mean Low Water Springs	Not reported	40	5	38.91	5	40	elevation uncertainty according to supplementary information from Bard et al., 1996 (GRL). Elevation referred to MSL using the MLLW calculated by IMCalc, Lorscheid and Rovere, 2019	Uplifting	0.2 to 0.5	Not Reported	0.35	0.15	used the mid point of the rate range given in Bard et al., 1996 (GRL)	Reef complex II-2	Not Reported	Yes
1018	1	Coral		Yes	Mass Spectrometer	Yes	Yes	Camoin et al., 2001 Chutcharavan and Dutton, 2020		CA01-021	CA01-021-001	FIL 8/40, 18.7m	2001-01-01	No	Single analysis; outside acceptable range for initial uranium isotopic composition (delta 234Ui = 149 +/- 4 per mil)	No	Single analysis; outside acceptable range for initial uranium isotopic composition (delta 234Ui = 145 +7/-5 per mil)	Chutcharavan and Dutton, 2020	Flexible protocol	No	Single analysis; outside acceptable range for initial uranium isotopic composition (delta 234Ui = 145 +/- 5 per mil)	Chutcharavan and Dutton, 2020	Strict protocol	French Polynesia	Mururoa atoll, Tuamotu archipelago	Northeastern rim of atoll; drill core	-21.7971	-138.852	21°50'S	138° 53'W	Yes	from site map of Camoin et al. 2001, P cubed	Mean Sea Level / General definition	Distance from top of drill core	-18.7	Not Reported	-18.7	1		Elevation reported relative to reef surface (presumed here as mlws); no elevation uncertainty quoted: assigned arbitrary ±1 m uncertainty	Subsiding	-0.07 to -0.08	Not Reported	-0.075		used the mid point of the subsidence rate range given in Trichet et al., 1984 (Marine Gology 56: 241-257.)		coralgal framework indicative of 0-6 m paleowater depth	Yes
1019	1	Coral		Yes	Mass Spectrometer	Yes	Yes	Camoin et al., 2001 Chutcharavan and Dutton, 2020		CA01-022	CA01-022-001	FIL 8/40, 18.2m	2001-01-01	No	Single analysis; outside acceptable range for initial uranium isotopic composition (delta 234Ui = 149 +/- 4 ?)	No	Single analysis; calcite content ? 2 %; outside acceptable range for initial uranium isotopic composition (delta 234Ui = 145 +7/-5 ?)	Chutcharavan and Dutton, 2020	Flexible protocol	No	Single analysis; calcite content >= 2 %; outside acceptable range for initial uranium isotopic composition (delta 234Ui = 145 +/- 5 per mil)	Chutcharavan and Dutton, 2020	Strict protocol	French Polynesia	Mururoa atoll, Tuamotu archipelago	Northeastern rim of atoll; drill core	-21.7971	-138.852	21°50'S	138° 53'W	Yes	from site map of Camoin et al. 2001, P cubed	Mean Sea Level / General definition	Distance from top of drill core	-18.2	Not Reported	-18.2	1		Elevation reported relative to reef surface (presumed here as mlws); no elevation uncertainty quoted: assigned arbitrary ±1 m uncertainty	Subsiding	-0.07 to -0.08	Not Reported	-0.075		used the mid point of the subsidence rate range given in Trichet et al., 1984 (Marine Gology 56: 241-257.)		coralgal framework indicative of 0-6 m paleowater depth	Yes
1020	1	Coral		Yes	Mass Spectrometer	Yes	Yes	Camoin et al., 2001 Chutcharavan and Dutton, 2020		CA01-025	CA01-025-001	FIL 5/30, 21.8m	2001-01-01	No	Single analysis; outside acceptable range for initial uranium isotopic composition (delta 234Ui = 149 +/- 4 ?)	No	Single analysis; outside acceptable range for initial uranium isotopic composition (delta 234Ui = 145 +7/-5 ?)	Chutcharavan and Dutton, 2020	Flexible protocol	No	Single analysis; outside acceptable range for initial uranium isotopic composition (delta 234Ui = 145 +/- 5 per mil)	Chutcharavan and Dutton, 2020	Strict protocol	French Polynesia	Mururoa atoll, Tuamotu archipelago	Northeastern rim of atoll; drill core	-21.8093	-138.82	21°50'S	138° 53'W	Yes	from site map of Camoin et al. 2001, P cubed	Mean Sea Level / General definition	Distance from top of drill core	-21.8	Not Reported	-21.8	1		Elevation reported relative to reef surface (presumed here as mlws); no elevation uncertainty quoted: assigned arbitrary ±1 m uncertainty	Subsiding	-0.07 to -0.08	Not Reported	-0.075		used the mid point of the subsidence rate range given in Trichet et al., 1984 (Marine Gology 56: 241-257.)		Not Reported	Yes
1021	1	Coral		Yes	Mass Spectrometer	Yes	Yes	Camoin et al., 2001 Chutcharavan and Dutton, 2020		CA01-029	CA01-029-001	FIL 8/40, 10.1m	2001-01-01	No	Single analysis; outside acceptable range for initial uranium isotopic composition (delta 234Ui = 149 +/- 4 per mil)	No	Single analysis; calcite content >= 2 %; outside acceptable range for initial uranium isotopic composition (delta 234Ui = 145 +7/-5 per mil)	Chutcharavan and Dutton, 2020	Flexible protocol	No	Single analysis; calcite content >= 2 %; outside acceptable range for initial uranium isotopic composition (delta 234Ui = 145 +/- 5 per mil)	Chutcharavan and Dutton, 2020	Strict protocol	French Polynesia	Mururoa atoll, Tuamotu archipelago	Northeastern rim of atoll; drill core	-21.7971	-138.852	21°50'S	138° 53'W	Yes	from site map of Camoin et al. 2001, P cubed	Mean Sea Level / General definition	Distance from top of drill core	-10.1	Not Reported	-10.1	1		Elevation reported relative to reef surface (presumed here as mlws); no elevation uncertainty quoted: assigned arbitrary ±1 m uncertainty	Subsiding	-0.07 to -0.08	Not Reported	-0.075		used the mid point of the subsidence rate range given in Trichet et al., 1984 (Marine Gology 56: 241-257.)		Not Reported	Yes
1022	1	Coral		Yes	Mass Spectrometer	Yes	Yes	Camoin et al., 2001 Chutcharavan and Dutton, 2020		CA01-030	CA01-030-001	FIL 8/30, 14.45m	2001-01-01	No	Single analysis; outside acceptable range for initial uranium isotopic composition (delta 234Ui = 149 +/- 4 ?)	No	Single analysis; outside acceptable range for initial uranium isotopic composition (delta 234Ui = 145 +7/-5 ?)	Chutcharavan and Dutton, 2020	Flexible protocol	No	Single analysis; outside acceptable range for initial uranium isotopic composition (delta 234Ui = 145 +/- 5 per mil)	Chutcharavan and Dutton, 2020	Strict protocol	French Polynesia	Mururoa atoll, Tuamotu archipelago	Northeastern rim of atoll; drill core	-21.7971	-138.852	21°50'S	138° 53'W	Yes	from site map of Camoin et al. 2001, P cubed	Mean Sea Level / General definition	Distance from top of drill core	-14.45	Not Reported	-14.45	1		Elevation reported relative to reef surface (presumed here as mlws); no elevation uncertainty quoted: assigned arbitrary ±1 m uncertainty	Subsiding	-0.07 to -0.08	Not Reported	-0.075		used the mid point of the subsidence rate range given in Trichet et al., 1984 (Marine Gology 56: 241-257.)		Not Reported	Yes
273	1	Coral		Yes	Mass spectrometer	Yes	Yes	Chen et al., 1991 Chutcharavan and Dutton, 2020		CH91-003	CH91-003-001	35 (86GI-7)	1991-01-01	Yes		Yes		Chutcharavan and Dutton, 2020	Flexible protocol	Yes		Chutcharavan and Dutton, 2020	Strict protocol	Bahamas	Great Inagua Island	Devil's Point Reef	21.013	-73.7	N/A	N/A	Yes	Estimated from Fig. 1 of Chen et al., 1991 (GSA Bulletin) and Google Earth	Mean High Tide (MHT)	Not reported	1.5	Not Reported	1.5	1.5	1.86576	Reported elevation relative to MHT from White et al. (1998) Carbonates and evaporites; mllw/mlws elevations calculated using tidal data from Settlement point, Grand Bahama Island, from NOAA; elevation uncertainty estimated from Figs. 6 and 7 from White et al. (1998) Carbonates and Evaporites; Note: Skrivanek et al., 2018 (QSR) has resurveyed the site and determined that the elevations for Great I…	Stable							in situ patch reef	Yes
274	1	Coral		Yes	Mass spectrometer	Yes	Yes	Chen et al., 1991 Chutcharavan and Dutton, 2020		CH91-004	CH91-004-001	37 (87GI-7)	1991-01-01	Yes		Yes		Chutcharavan and Dutton, 2020	Flexible protocol	Yes		Chutcharavan and Dutton, 2020	Strict protocol	Bahamas	Great Inagua Island	Devil's Point Reef	21.013	-73.7	N/A	N/A	Yes	Estimated from Fig. 1 of Chen et al., 1991 (GSA Bulletin) and Google Earth	Mean High Tide (MHT)	Not reported	0.5	Not Reported	0.5	1.5	0.86576	Reported elevation relative to MHT from White et al. (1998) Carbonates and evaporites; mllw/mlws elevations calculated using tidal data from Settlement point, Grand Bahama Island, from NOAA; elevation uncertainty estimated from Figs. 6 and 7 from White et al. (1998) Carbonates and Evaporites; Note: Skrivanek et al., 2018 (QSR) has resurveyed the site and determined that the elevations for Great I…	Stable							in situ patch reef	Yes
276	1	Coral		Yes	Mass spectrometer	Yes	Yes	Chen et al., 1991 Chutcharavan and Dutton, 2020		CH91-006	CH91-006-001	34 (86GI-5)	1991-01-01	Yes		Yes		Chutcharavan and Dutton, 2020	Flexible protocol	Yes		Chutcharavan and Dutton, 2020	Strict protocol	Bahamas	Great Inagua Island	Devil's Point Reef	21.013	-73.7	N/A	N/A	Yes	Estimated from Fig. 1 of Chen et al., 1991 (GSA Bulletin) and Google Earth	Mean High Tide (MHT)	Not reported	1	Not Reported	1	1.5	1.36576	Reported elevation relative to MHT from White et al. (1998) Carbonates and evaporites; mllw/mlws elevations calculated using tidal data from Settlement point, Grand Bahama Island, from NOAA; elevation uncertainty estimated from Figs. 6 and 7 from White et al. (1998) Carbonates and Evaporites; Note: Skrivanek et al., 2018 (QSR) has resurveyed the site and determined that the elevations for Great I…	Stable							in situ patch reef	Yes
277	1	Coral		Yes	Mass spectrometer	Yes	Yes	Chen et al., 1991 Chutcharavan and Dutton, 2020		CH91-007	CH91-007-001	36 (87GI-6)	1991-01-01	Yes		Yes		Chutcharavan and Dutton, 2020	Flexible protocol	Yes		Chutcharavan and Dutton, 2020	Strict protocol	Bahamas	Great Inagua Island	Devil's Point Reef	21.013	-73.7	N/A	N/A	Yes	Estimated from Fig. 1 of Chen et al., 1991 (GSA Bulletin) and Google Earth	Mean High Tide (MHT)	Not reported	1	Not Reported	1	1.5	1.36576	Reported elevation relative to MHT from White et al. (1998) Carbonates and evaporites; mllw/mlws elevations calculated using tidal data from Settlement point, Grand Bahama Island, from NOAA; elevation uncertainty estimated from Figs. 6 and 7 from White et al. (1998) Carbonates and Evaporites; Note: Skrivanek et al., 2018 (QSR) has resurveyed the site and determined that the elevations for Great I…	Stable							in situ patch reef	Yes
298	1	Coral		Yes	Mass spectrometer	Yes	Yes	Chen et al., 1991 Chutcharavan and Dutton, 2020		CH91-021	CH91-021-001	4 (87CT-3 S)	1991-01-01	Yes		Yes		Chutcharavan and Dutton, 2020	Flexible protocol	Yes		Chutcharavan and Dutton, 2020	Strict protocol	Bahamas	San Salvador Island	Cockburn Town reef	24.0524	-74.535	N/A	N/A	Yes	Estimated from Fig. 1 of Chen et al., 1991 (GSA Bulletin) and Google Earth	Mean Sea Level / General definition	Not reported	1.5	Not Reported	1.5	1.5	1.89624	mllw/mllws elevations calculated using tidal data from Matthew Town, Great Inagua, from NOAA	Stable							coralstone, patch reef, in situ coral	Yes
299	1	Coral		Yes	Mass spectrometer	Yes	Yes	Chen et al., 1991 Chutcharavan and Dutton, 2020		CH91-021	CH91-021-002	4 (87CT-3 L)	1991-01-01	Yes		Yes		Chutcharavan and Dutton, 2020	Flexible protocol	Yes		Chutcharavan and Dutton, 2020	Strict protocol	Bahamas	San Salvador Island	Cockburn Town reef	24.0524	-74.535	N/A	N/A	Yes	Estimated from Fig. 1 of Chen et al., 1991 (GSA Bulletin) and Google Earth	Mean Sea Level / General definition	Not reported	1.5	Not Reported	1.5	1.5	1.89624	mllw/mllws elevations calculated using tidal data from Matthew Town, Great Inagua, from NOAA	Stable							coralstone, patch reef, in situ coral	Yes
304	1	Coral		Yes	Mass spectrometer	Yes	Yes	Chen et al., 1991 Chutcharavan and Dutton, 2020		CH91-024	CH91-024-001	25 (87SP-3)	1991-01-01	Yes		Yes		Chutcharavan and Dutton, 2020	Flexible protocol	Yes		Chutcharavan and Dutton, 2020	Strict protocol	Bahamas	San Salvador Island	Sue Point Reef	24.08	-74.53	N/A	N/A	Yes	Estimated from Fig. 1 of Chen et al., 1991 (GSA Bulletin) and Google Earth	Mean High Tide (MHT)	Not reported	1	Not Reported	1.02624	1.5	1.39624	Reported elevation relative to MHT from White et al. (1998) Carbonates and evaporites; mllw/mllws elevations calculated using tidal data from Matthew Town, Great Inagua, from NOAA; elevation uncertainty estimated from Figs. 6 and 7 from White et al. (1998) Carbonates and Evaporites. Elevation above MSL calculated from MLLW data extracted from IMCalc, Lorscheid and Rovere, 2019.	Stable							in situ patch reef	Yes
305	1	Coral		Yes	Mass spectrometer	Yes	Yes	Chen et al., 1991 Chutcharavan and Dutton, 2020		CH91-025	CH91-025-001	3 (87CT-2)	1991-01-01	Yes		Yes		Chutcharavan and Dutton, 2020	Flexible protocol	Yes		Chutcharavan and Dutton, 2020	Strict protocol	Bahamas	San Salvador Island	Cockburn Town reef	24.0524	-74.535	N/A	N/A	Yes	Estimated from Fig. 1 of Chen et al., 1991 (GSA Bulletin) and Google Earth	Mean Sea Level / General definition	Not reported	2.25	Not Reported	2.25	1.5	2.64624	mllw/mllws elevations calculated using tidal data from Matthew Town, Great Inagua, from NOAA	Stable							coralstone, patch reef, in situ coral	Yes
308	1	Coral		Yes	Mass spectrometer	Yes	Yes	Chen et al., 1991 Chutcharavan and Dutton, 2020		CH91-027	CH91-027-001	2 (87CT-1 S)	1991-01-01	Yes		Yes		Chutcharavan and Dutton, 2020	Flexible protocol	Yes		Chutcharavan and Dutton, 2020	Strict protocol	Bahamas	San Salvador Island	Cockburn Town reef	24.0524	-74.535	N/A	N/A	Yes	Estimated from Fig. 1 of Chen et al., 1991 (GSA Bulletin) and Google Earth	Mean Sea Level / General definition	Not reported	2.25	Not Reported	2.25	1.5	2.64624	mllw/mllws elevations calculated using tidal data from Matthew Town, Great Inagua, from NOAA	Stable							coralstone, patch reef, in situ coral	Yes
309	1	Coral		Yes	Mass spectrometer	Yes	Yes	Chen et al., 1991 Chutcharavan and Dutton, 2020		CH91-027	CH91-027-002	2 (87CT-1 L)	1991-01-01	Yes		Yes		Chutcharavan and Dutton, 2020	Flexible protocol	Yes		Chutcharavan and Dutton, 2020	Strict protocol	Bahamas	San Salvador Island	Cockburn Town reef	24.0524	-74.535	N/A	N/A	Yes	Estimated from Fig. 1 of Chen et al., 1991 (GSA Bulletin) and Google Earth	Mean Sea Level / General definition	Not reported	2.25	Not Reported	2.25	1.5	2.64624	mllw/mllws elevations calculated using tidal data from Matthew Town, Great Inagua, from NOAA	Stable							coralstone, patch reef, in situ coral	Yes
310	1	Coral		Yes	Mass spectrometer	Yes	Yes	Chen et al., 1991 Chutcharavan and Dutton, 2020		CH91-028	CH91-028-001	1 (6/86#5)	1991-01-01	Yes		No	Single analysis; calcite content >= 2 %	Chutcharavan and Dutton, 2020	Flexible protocol	No	Single analysis; calcite content >= 2 %	Chutcharavan and Dutton, 2020	Strict protocol	Bahamas	San Salvador Island	Cockburn Town reef	24.0524	-74.535	N/A	N/A	Yes	Estimated from Fig. 1 of Chen et al., 1991 (GSA Bulletin) and Google Earth	Mean Sea Level / General definition	Not reported	2.25	Not Reported	2.25	1.5	2.64624	mllw/mllws elevations calculated using tidal data from Matthew Town, Great Inagua, from NOAA	Stable							coralstone, patch reef, in situ coral	Yes
311	1	Coral		Yes	Mass spectrometer	Yes	Yes	Chen et al., 1991 Chutcharavan and Dutton, 2020		CH91-029	CH91-029-001	24 (87SP-2)	1991-01-01	Yes		Yes		Chutcharavan and Dutton, 2020	Flexible protocol	Yes		Chutcharavan and Dutton, 2020	Strict protocol	Bahamas	San Salvador Island	Sue Point Reef	24.08	-74.53	N/A	N/A	Yes	Estimated from Fig. 1 of Chen et al., 1991 (GSA Bulletin) and Google Earth	Mean Sea Level / General definition	Not reported	1	Not Reported	1	1.5	1.39624	mllw/mllws elevations calculated using tidal data from Matthew Town, Great Inagua, from NOAA	Stable							in situ patch reef	Yes
312	1	Coral		Yes	Mass spectrometer	Yes	Yes	Chen et al., 1991 Chutcharavan and Dutton, 2020		CH91-030	CH91-030-001	6 (88CT-1)	1991-01-01	Yes		No	Single analysis; calcite content >= 2 %	Chutcharavan and Dutton, 2020	Flexible protocol	No	Single analysis; calcite content >= 2 %	Chutcharavan and Dutton, 2020	Strict protocol	Bahamas	San Salvador Island	Cockburn Town reef	24.0524	-74.535	N/A	N/A	Yes	Estimated from Fig. 1 of Chen et al., 1991 (GSA Bulletin) and Google Earth	Mean Sea Level / General definition	Not reported	2.5	Not Reported	2.5	1.5	2.89624	mllw/mllws elevations calculated using tidal data from Matthew Town, Great Inagua, from NOAA	Stable							coralstone, patch reef, in situ coral	Yes
313	1	Coral		Yes	Mass spectrometer	Yes	Yes	Chen et al., 1991 Chutcharavan and Dutton, 2020		CH91-031	CH91-031-001	23 (87SP-1)	1991-01-01	Yes		Yes		Chutcharavan and Dutton, 2020	Flexible protocol	Yes		Chutcharavan and Dutton, 2020	Strict protocol	Bahamas	San Salvador Island	Sue Point Reef	24.08	-74.53	N/A	N/A	Yes	Estimated from Fig. 1 of Chen et al., 1991 (GSA Bulletin) and Google Earth	Mean Sea Level / General definition	Not reported	1	Not Reported	1	1.5	1.39624	mllw/mllws elevations calculated using tidal data from Matthew Town, Great Inagua, from NOAA	Stable							in situ patch reef	Yes
314	1	Coral		Yes	Mass spectrometer	Yes	Yes	Chen et al., 1991 Chutcharavan and Dutton, 2020		CH91-032	CH91-032-001	5 (87CT-4 L)	1991-01-01	Yes		Yes		Chutcharavan and Dutton, 2020	Flexible protocol	Yes		Chutcharavan and Dutton, 2020	Strict protocol	Bahamas	San Salvador Island	Cockburn Town reef	24.0524	-74.535	N/A	N/A	Yes	Estimated from Fig. 1 of Chen et al., 1991 (GSA Bulletin) and Google Earth	Mean Sea Level / General definition	Not reported	2.25	Not Reported	2.25	1.5	2.64624	mllw/mllws elevations calculated using tidal data from Matthew Town, Great Inagua, from NOAA	Stable							coralstone, patch reef, in situ coral	Yes
315	1	Coral		Yes	Mass spectrometer	Yes	Yes	Chen et al., 1991 Chutcharavan and Dutton, 2020		CH91-032	CH91-032-002	5 (87CT-4 S)	1991-01-01	Yes		Yes		Chutcharavan and Dutton, 2020	Flexible protocol	Yes		Chutcharavan and Dutton, 2020	Strict protocol	Bahamas	San Salvador Island	Cockburn Town reef	24.0524	-74.535	N/A	N/A	Yes	Estimated from Fig. 1 of Chen et al., 1991 (GSA Bulletin) and Google Earth	Mean Sea Level / General definition	Not reported	2.25	Not Reported	2.25	1.5	2.64624	mllw/mllws elevations calculated using tidal data from Matthew Town, Great Inagua, from NOAA	Stable							coralstone, patch reef, in situ coral	Yes
1085	1	Coral		Yes	Mass Spectrometer	Yes	Yes	Coyne et al., 2007 Chutcharavan and Dutton, 2020		CO07-016	CO07-016-001	PBQA-13-2001	2007-01-01	Yes		No	Single analysis; calcite content >= 2 %	Chutcharavan and Dutton, 2020	Flexible protocol	No	Single analysis; calcite content >= 2 %	Chutcharavan and Dutton, 2020	Strict protocol	Grand Cayman	west coast of Grand Cayman	Paul Bodden's quarry	19.2806	-81.3761	N/A	N/A	Yes	Estimated from fig. 2 in Coyne et al., 2007 (QSR) and from Google Earth	Mean Sea Level / General definition	Not reported	Not Reported	Not Reported	2	1		no elevation uncertainty quoted: assigned arbitrary ±1 m uncertainty; elevation estimated from fig. 3 of Coyne et al., 2007 (QSR)	Stable							Unit D (Large Porites thickets)	Yes
1086	1	Coral		Yes	Mass Spectrometer	Yes	Yes	Coyne et al., 2007 Chutcharavan and Dutton, 2020		CO07-017	CO07-017-001	MH1-6" asl	2007-01-01	No	Single analysis; outside acceptable range for initial uranium isotopic composition (delta 234Ui = 140 +/- 30 per mil)	No	Single analysis; outside acceptable range for initial uranium isotopic composition (delta 234Ui = 145 +7/-5 per mil)	Chutcharavan and Dutton, 2020	Flexible protocol	No	Single analysis; outside acceptable range for initial uranium isotopic composition (delta 234Ui = 145 +/- 5 per mil)	Chutcharavan and Dutton, 2020	Strict protocol	Grand Cayman	west coast of North Sound	Morgan's Harbour	19.374	-81.3798	N/A	N/A	Yes	Estimated from fig. 2 in Coyne et al., 2007 (QSR) and from Google Earth	Mean Sea Level / General definition	Not reported	Not Reported	Not Reported	1	1		no elevation uncertainty quoted: assigned arbitrary ±1 m uncertainty; elevation estimated from fig. 3 of Coyne et al., 2007 (QSR)	Stable							Unit D (The lower unit [in Morgan's Harbour/Salt Creek] is characterized by patch reef, 5-15 m diameter, that are formed of a diverse array of well-preserved corals)	Yes
1087	1	Coral		Yes	Mass Spectrometer	Yes	Yes	Coyne et al., 2007 Chutcharavan and Dutton, 2020		CO07-018	CO07-018-001	MH1-2' asl	2007-01-01	Yes		No	Single analysis; 232Th concentration > 2 ppb; outside acceptable range for initial uranium isotopic composition (delta 234Ui = 145 +7/-5 per mil)	Chutcharavan and Dutton, 2020	Flexible protocol	No	Single analysis; detrital 232Th content > 2 ppb; outside acceptable range for initial uranium isotopic composition (delta 234Ui = 145 +/- 5 per mil)	Chutcharavan and Dutton, 2020	Strict protocol	Grand Cayman	west coast of North Sound	Morgan's Harbour	19.374	-81.3798	N/A	N/A	Yes	Estimated from fig. 2 in Coyne et al., 2007 (QSR) and from Google Earth	Mean Sea Level / General definition	Not reported	Not Reported	Not Reported	1	1		no elevation uncertainty quoted: assigned arbitrary ±1 m uncertainty; elevation estimated from fig. 3 of Coyne et al., 2007 (QSR)	Stable							Unit D (The lower unit [in Morgan's Harbour/Salt Creek] is characterized by patch reef, 5-15 m diameter, that are formed of a diverse array of well-preserved corals)	Yes
1088	1	Coral		Yes	Mass Spectrometer	Yes	Yes	Coyne et al., 2007 Chutcharavan and Dutton, 2020		CO07-019	CO07-019-001	VDM4-1-99	2007-01-01	No	Single analysis; outside acceptable range for initial uranium isotopic composition (delta 234Ui = 140 +/- 30 per mil)	No	Single analysis; calcite content >= 2 %; 232Th concentration > 2 ppb; outside acceptable range for initial uranium isotopic composition (delta 234Ui = 145 +7/-5 per mil)	Chutcharavan and Dutton, 2020	Flexible protocol	No	Single analysis; calcite content >= 2 %; detrital 232Th content > 2 ppb; outside acceptable range for initial uranium isotopic composition (delta 234Ui = 145 +/- 5 per mil)	Chutcharavan and Dutton, 2020	Strict protocol	Grand Cayman	west coast of North Sound		19.3569	-81.3699	N/A	N/A	Yes	Estimated from fig. 2 in Coyne et al., 2007 (QSR) and from Google Earth	Mean Sea Level / General definition	Not reported	Not Reported	Not Reported	2	1		no elevation uncertainty quoted: assigned arbitrary ±1 m uncertainty; elevation estimated from fig. 3 of Coyne et al., 2007 (QSR)	Stable							Unit D (Coral patch reef)	Yes
1089	1	Coral		Yes	Mass Spectrometer	Yes	Yes	Coyne et al., 2007 Chutcharavan and Dutton, 2020		CO07-020	CO07-020-001	VDM4-1-99B	2007-01-01	Yes		No	Single analysis; calcite content >= 2 %; 232Th concentration > 2 ppb; outside acceptable range for initial uranium isotopic composition (delta 234Ui = 145 +7/-5 per mil)	Chutcharavan and Dutton, 2020	Flexible protocol	No	Single analysis; calcite content >= 2 %; detrital 232Th content > 2 ppb; outside acceptable range for initial uranium isotopic composition (delta 234Ui = 145 +/- 5 per mil)	Chutcharavan and Dutton, 2020	Strict protocol	Grand Cayman	west coast of North Sound		19.3569	-81.3699	N/A	N/A	Yes	Estimated from fig. 2 in Coyne et al., 2007 (QSR) and from Google Earth	Mean Sea Level / General definition	Not reported	Not Reported	Not Reported	2	1		no elevation uncertainty quoted: assigned arbitrary ±1 m uncertainty; elevation estimated from fig. 3 of Coyne et al., 2007 (QSR)	Stable							Unit D (Coral patch reef)	Yes
1040	1	Coral		Yes	Mass Spectrometer	Yes	Yes	Dechnik et al., 2017 Chutcharavan and Dutton, 2020		DE17-001	DE17-001-001	FFX3-10D_1	2017-01-01	Yes		Yes		Chutcharavan and Dutton, 2020	Flexible protocol	No	Multiple analyses of same coral; this subsample outside acceptable range for initial uranium isotopic composition (delta 234Ui = 145 +/- 5 per mil)	Chutcharavan and Dutton, 2020	Strict protocol	Great Barrier Reef	Southern GBR	Fairfax Reef	-23.8583	152.375	23°51'29.79"S	152°22'31.12"E	No		Mean Sea Level / General definition	Distance from top of drill core	-12.07	Not Reported	-12.07	1		No elevation uncertainty reported, so have arbitrarily assigned elevation uncertainty of +/- 1 m	Stable							cAA and aA1 assemblages dominate; Holocene/Pleistocene boundary is at 7.6 m, with a second thin soil horizon at 8.7-8.8 m. The authors interpret this second soil horizion as either part of the Holocene/Pleistocene boundary or, alternatively, a small (<2-3 m) sea-level oscillation. The second soil horizon is not observed in any of the other GBR cores taken for this study.	Yes
1041	1	Coral		Yes	Mass Spectrometer	Yes	Yes	Dechnik et al., 2017 Chutcharavan and Dutton, 2020		DE17-001	DE17-001-002	FFX3-10D_2	2017-01-01	Yes		Yes		Chutcharavan and Dutton, 2020	Flexible protocol	Yes		Chutcharavan and Dutton, 2020	Strict protocol	Great Barrier Reef	Southern GBR	Fairfax Reef	-23.8583	152.375	23°51'29.79"S	152°22'31.12"E	No		Mean Sea Level / General definition	Distance from top of drill core	-12.07	Not Reported	-12.07	1		No elevation uncertainty reported, so have arbitrarily assigned elevation uncertainty of +/- 1 m	Stable							cAA and aA1 assemblages dominate; Holocene/Pleistocene boundary is at 7.6 m, with a second thin soil horizon at 8.7-8.8 m. The authors interpret this second soil horizion as either part of the Holocene/Pleistocene boundary or, alternatively, a small (<2-3 m) sea-level oscillation. The second soil horizon is not observed in any of the other GBR cores taken for this study.	Yes
1042	1	Coral		Yes	Mass Spectrometer	Yes	Yes	Dechnik et al., 2017 Chutcharavan and Dutton, 2020		DE17-001	DE17-001-003	FFX3-10D_3	2017-01-01	Yes		Yes		Chutcharavan and Dutton, 2020	Flexible protocol	Yes		Chutcharavan and Dutton, 2020	Strict protocol	Great Barrier Reef	Southern GBR	Fairfax Reef	-23.8583	152.375	23°51'29.79"S	152°22'31.12"E	No		Mean Sea Level / General definition	Distance from top of drill core	-12.07	Not Reported	-12.07	1		No elevation uncertainty reported, so have arbitrarily assigned elevation uncertainty of +/- 1 m	Stable							cAA and aA1 assemblages dominate; Holocene/Pleistocene boundary is at 7.6 m, with a second thin soil horizon at 8.7-8.8 m. The authors interpret this second soil horizion as either part of the Holocene/Pleistocene boundary or, alternatively, a small (<2-3 m) sea-level oscillation. The second soil horizon is not observed in any of the other GBR cores taken for this study.	Yes
1043	1	Coral		Yes	Mass Spectrometer	Yes	Yes	Dechnik et al., 2017 Chutcharavan and Dutton, 2020		DE17-002	DE17-002-001	FFX3-7C_1	2017-01-01	No	Multiple analyses of same coral; this subsample outside accepted range for initial uranium isotopic composition (delta 234Ui > 152 per mil)	No	Multiple analyses of the same coral; outside acceptable range for initial uranium isotopic composition (delta 234Ui = 145 +7/-5 per mil)	Chutcharavan and Dutton, 2020	Flexible protocol	No	Multiple analyses of same coral; this subsample outside acceptable range for initial uranium isotopic composition (delta 234Ui = 145 +/- 5 per mil)	Chutcharavan and Dutton, 2020	Strict protocol	Great Barrier Reef	Southern GBR	Fairfax Reef	-23.8583	152.375	23°51'29.79"S	152°22'31.12"E	No		Mean Sea Level / General definition	Distance from top of drill core	-8.05	Not Reported	-8.05	1		No elevation uncertainty reported, so have arbitrarily assigned elevation uncertainty of +/- 1 m	Stable							cAA and aA1 assemblages dominate; Halimeda fragments present; Holocene/Pleistocene boundary is at 7.6 m, with a second thin soil horizon at 8.7-8.8 m. The authors interpret this second soil horizion as either part of the Holocene/Pleistocene boundary or, alternatively, a small (<2-3 m) sea-level oscillation. The second soil horizon is not observed in any of the other GBR cores taken for this stud…	Yes
1044	1	Coral		Yes	Mass Spectrometer	Yes	Yes	Dechnik et al., 2017 Chutcharavan and Dutton, 2020		DE17-002	DE17-002-002	FFX3-7C_2	2017-01-01	No	Multiple analyses of same coral; this subsample outside accepted range for initial uranium isotopic composition (delta 234Ui > 152 per mil)	No	Multiple analyses of the same coral; outside acceptable range for initial uranium isotopic composition (delta 234Ui = 145 +7/-5 per mil)	Chutcharavan and Dutton, 2020	Flexible protocol	No	Multiple analyses of same coral; this subsample outside acceptable range for initial uranium isotopic composition (delta 234Ui = 145 +/- 5 per mil)	Chutcharavan and Dutton, 2020	Strict protocol	Great Barrier Reef	Southern GBR	Fairfax Reef	-23.8583	152.375	23°51'29.79"S	152°22'31.12"E	No		Mean Sea Level / General definition	Distance from top of drill core	-8.05	Not Reported	-8.05	1		No elevation uncertainty reported, so have arbitrarily assigned elevation uncertainty of +/- 1 m	Stable							cAA and aA1 assemblages dominate; Halimeda fragments present; Holocene/Pleistocene boundary is at 7.6 m, with a second thin soil horizon at 8.7-8.8 m. The authors interpret this second soil horizion as either part of the Holocene/Pleistocene boundary or, alternatively, a small (<2-3 m) sea-level oscillation. The second soil horizon is not observed in any of the other GBR cores taken for this stud…	Yes
1045	1	Coral		Yes	Mass Spectrometer	Yes	Yes	Dechnik et al., 2017 Chutcharavan and Dutton, 2020		DE17-002	DE17-002-003	FFX3-7C_3	2017-01-01	No	Multiple analyses of same coral; this subsample outside accepted range for initial uranium isotopic composition (delta 234Ui > 152 per mil)	No	Multiple analyses of the same coral; outside acceptable range for initial uranium isotopic composition (delta 234Ui = 145 +7/-5 per mil)	Chutcharavan and Dutton, 2020	Flexible protocol	No	Multiple analyses of same coral; this subsample outside acceptable range for initial uranium isotopic composition (delta 234Ui = 145 +/- 5 per mil)	Chutcharavan and Dutton, 2020	Strict protocol	Great Barrier Reef	Southern GBR	Fairfax Reef	-23.8583	152.375	23°51'29.79"S	152°22'31.12"E	No		Mean Sea Level / General definition	Distance from top of drill core	-8.05	Not Reported	-8.05	1		No elevation uncertainty reported, so have arbitrarily assigned elevation uncertainty of +/- 1 m	Stable							cAA and aA1 assemblages dominate; Halimeda fragments present; Holocene/Pleistocene boundary is at 7.6 m, with a second thin soil horizon at 8.7-8.8 m. The authors interpret this second soil horizion as either part of the Holocene/Pleistocene boundary or, alternatively, a small (<2-3 m) sea-level oscillation. The second soil horizon is not observed in any of the other GBR cores taken for this stud…	Yes
1046	1	Coral		Yes	Mass Spectrometer	Yes	Yes	Dechnik et al., 2017 Chutcharavan and Dutton, 2020		DE17-003	DE17-003-001	FFX3-7D_1	2017-01-01	No	Multiple analyses of same coral; this subsample outside accepted range for initial uranium isotopic composition (delta 234Ui > 152 per mil)	No	Multiple analyses of the same coral; outside acceptable range for initial uranium isotopic composition (delta 234Ui = 145 +7/-5 per mil)	Chutcharavan and Dutton, 2020	Flexible protocol	No	Multiple analyses of same coral; this subsample outside acceptable range for initial uranium isotopic composition (delta 234Ui = 145 +/- 5 per mil); part of diagenetic array	Chutcharavan and Dutton, 2020	Strict protocol	Great Barrier Reef	Southern GBR	Fairfax Reef	-23.8583	152.375	23°51'29.79"S	152°22'31.12"E	No		Mean Sea Level / General definition	Distance from top of drill core	-8.3	Not Reported	-8.3	1		No elevation uncertainty reported, so have arbitrarily assigned elevation uncertainty of +/- 1 m	Stable							cAA and aA1 assemblages dominate; Halimeda fragments present; Holocene/Pleistocene boundary is at 7.6 m, with a second thin soil horizon at 8.7-8.8 m. The authors interpret this second soil horizion as either part of the Holocene/Pleistocene boundary or, alternatively, a small (<2-3 m) sea-level oscillation. The second soil horizon is not observed in any of the other GBR cores taken for this stud…	Yes
1047	1	Coral		Yes	Mass Spectrometer	Yes	Yes	Dechnik et al., 2017 Chutcharavan and Dutton, 2020		DE17-003	DE17-003-002	FFX3-7D_2	2017-01-01	No	Multiple analyses of same coral; this subsample outside accepted range for initial uranium isotopic composition (delta 234Ui > 152 per mil)	No	Multiple analyses of the same coral; outside acceptable range for initial uranium isotopic composition (delta 234Ui = 145 +7/-5 per mil)	Chutcharavan and Dutton, 2020	Flexible protocol	No	Multiple analyses of same coral; this subsample outside acceptable range for initial uranium isotopic composition (delta 234Ui = 145 +/- 5 per mil); part of diagenetic array	Chutcharavan and Dutton, 2020	Strict protocol	Great Barrier Reef	Southern GBR	Fairfax Reef	-23.8583	152.375	23°51'29.79"S	152°22'31.12"E	No		Mean Sea Level / General definition	Distance from top of drill core	-8.3	Not Reported	-8.3	1		No elevation uncertainty reported, so have arbitrarily assigned elevation uncertainty of +/- 1 m	Stable							cAA and aA1 assemblages dominate; Halimeda fragments present; Holocene/Pleistocene boundary is at 7.6 m, with a second thin soil horizon at 8.7-8.8 m. The authors interpret this second soil horizion as either part of the Holocene/Pleistocene boundary or, alternatively, a small (<2-3 m) sea-level oscillation. The second soil horizon is not observed in any of the other GBR cores taken for this stud…	Yes
1048	1	Coral		Yes	Mass Spectrometer	Yes	Yes	Dechnik et al., 2017 Chutcharavan and Dutton, 2020		DE17-003	DE17-003-003	FFX3-7D_3	2017-01-01	Yes		Yes		Chutcharavan and Dutton, 2020	Flexible protocol	Yes		Chutcharavan and Dutton, 2020	Strict protocol	Great Barrier Reef	Southern GBR	Fairfax Reef	-23.8583	152.375	23°51'29.79"S	152°22'31.12"E	No		Mean Sea Level / General definition	Distance from top of drill core	-8.3	Not Reported	-8.3	1		No elevation uncertainty reported, so have arbitrarily assigned elevation uncertainty of +/- 1 m	Stable							cAA and aA1 assemblages dominate; Halimeda fragments present; Holocene/Pleistocene boundary is at 7.6 m, with a second thin soil horizon at 8.7-8.8 m. The authors interpret this second soil horizion as either part of the Holocene/Pleistocene boundary or, alternatively, a small (<2-3 m) sea-level oscillation. The second soil horizon is not observed in any of the other GBR cores taken for this stud…	Yes
1049	1	Coral		Yes	Mass Spectrometer	Yes	Yes	Dechnik et al., 2017 Chutcharavan and Dutton, 2020		DE17-004	DE17-004-001	FFX3-9E_1	2017-01-01	Yes		Yes		Chutcharavan and Dutton, 2020	Flexible protocol	No	Multiple analyses of same coral; this subsample has calcite content >= 2 %; outside acceptable range for initial uranium isotopic composition (delta 234Ui = 145 +/- 5 per mil)	Chutcharavan and Dutton, 2020	Strict protocol	Great Barrier Reef	Southern GBR	Fairfax Reef	-23.8583	152.375	23°51'29.79"S	152°22'31.12"E	No		Mean Sea Level / General definition	Distance from top of drill core	-11.2	Not Reported	-11.2	1		No elevation uncertainty reported, so have arbitrarily assigned elevation uncertainty of +/- 1 m	Stable							cAA and aA1 assemblages dominate; Holocene/Pleistocene boundary is at 7.6 m, with a second thin soil horizon at 8.7-8.8 m. The authors interpret this second soil horizion as either part of the Holocene/Pleistocene boundary or, alternatively, a small (<2-3 m) sea-level oscillation. The second soil horizon is not observed in any of the other GBR cores taken for this study.	Yes
1050	1	Coral		Yes	Mass Spectrometer	Yes	Yes	Dechnik et al., 2017 Chutcharavan and Dutton, 2020		DE17-004	DE17-004-002	FFX3-9E_2	2017-01-01	Yes		Yes		Chutcharavan and Dutton, 2020	Flexible protocol	No	Multiple analyses of same coral; this subsample has calcite content >= 2 %; outside acceptable range for initial uranium isotopic composition (delta 234Ui = 145 +/- 5 per mil)	Chutcharavan and Dutton, 2020	Strict protocol	Great Barrier Reef	Southern GBR	Fairfax Reef	-23.8583	152.375	23°51'29.79"S	152°22'31.12"E	No		Mean Sea Level / General definition	Distance from top of drill core	-11.2	Not Reported	-11.2	1		No elevation uncertainty reported, so have arbitrarily assigned elevation uncertainty of +/- 1 m	Stable							cAA and aA1 assemblages dominate; Holocene/Pleistocene boundary is at 7.6 m, with a second thin soil horizon at 8.7-8.8 m. The authors interpret this second soil horizion as either part of the Holocene/Pleistocene boundary or, alternatively, a small (<2-3 m) sea-level oscillation. The second soil horizon is not observed in any of the other GBR cores taken for this study.	Yes
1051	1	Coral		Yes	Mass Spectrometer	Yes	Yes	Dechnik et al., 2017 Chutcharavan and Dutton, 2020		DE17-004	DE17-004-003	FFX3-9E_3	2017-01-01	Yes		Yes		Chutcharavan and Dutton, 2020	Flexible protocol	No	Multiple analyses of same coral; this subsample has calcite content >= 2 %	Chutcharavan and Dutton, 2020	Strict protocol	Great Barrier Reef	Southern GBR	Fairfax Reef	-23.8583	152.375	23°51'29.79"S	152°22'31.12"E	No		Mean Sea Level / General definition	Distance from top of drill core	-11.2	Not Reported	-11.2	1		No elevation uncertainty reported, so have arbitrarily assigned elevation uncertainty of +/- 1 m	Stable							cAA and aA1 assemblages dominate; Holocene/Pleistocene boundary is at 7.6 m, with a second thin soil horizon at 8.7-8.8 m. The authors interpret this second soil horizion as either part of the Holocene/Pleistocene boundary or, alternatively, a small (<2-3 m) sea-level oscillation. The second soil horizon is not observed in any of the other GBR cores taken for this study.	Yes
1052	1	Coral		Yes	Mass Spectrometer	Yes	Yes	Dechnik et al., 2017 Chutcharavan and Dutton, 2020		DE17-005	DE17-005-001	FIT2-10F_1	2017-01-01	No	Multiple analyses of same coral; this ample outside acceptable range for initial uranium isotope composition (delta 234Ui > 152 per mil); authors used open system age interpretation	No	Multiple analyses of the same coral; outside acceptable range for initial uranium isotopic composition (delta 234Ui = 145 +7/-5 per mil)	Chutcharavan and Dutton, 2020	Flexible protocol	No	Multiple analyses of same coral; this subsample outside acceptable range for initial uranium isotopic composition (delta 234Ui = 145 +/- 5 per mil)	Chutcharavan and Dutton, 2020	Strict protocol	Great Barrier Reef	Southern GBR	Fitzroy Reef	-23.6199	152.155	23°37'11.64"S	152°9'18.43"E	No		Mean Sea Level / General definition	Distance from top of drill core	-9.07	Not Reported	-9.07	1		No elevation uncertainty reported, so have arbitrarily assigned elevation uncertainty of +/- 1 m	Stable							cAB; cAA, aA1 and vermetid gastropods are also common throughout the core; solution unconformity present at the Holocene-Pleistocene boundary (7.4 m), indicating subaerial exposure (Dechnik et al. 2015).	Yes
1053	1	Coral		Yes	Mass Spectrometer	Yes	Yes	Dechnik et al., 2017 Chutcharavan and Dutton, 2020		DE17-005	DE17-005-002	FIT2-10F_2	2017-01-01	No	Multiple analyses of same coral; this ample outside acceptable range for initial uranium isotope composition (delta 234Ui > 152 per mil); authors used open system age interpretation	No	Multiple analyses of the same coral; outside acceptable range for initial uranium isotopic composition (delta 234Ui = 145 +7/-5 per mil)	Chutcharavan and Dutton, 2020	Flexible protocol	No	Multiple analyses of same coral; this subsample outside acceptable range for initial uranium isotopic composition (delta 234Ui = 145 +/- 5 per mil)	Chutcharavan and Dutton, 2020	Strict protocol	Great Barrier Reef	Southern GBR	Fitzroy Reef	-23.6199	152.155	23°37'11.64"S	152°9'18.43"E	No		Mean Sea Level / General definition	Distance from top of drill core	-9.07	Not Reported	-9.07	1		No elevation uncertainty reported, so have arbitrarily assigned elevation uncertainty of +/- 1 m	Stable							cAB; cAA, aA1 and vermetid gastropods are also common throughout the core; solution unconformity present at the Holocene-Pleistocene boundary (7.4 m), indicating subaerial exposure (Dechnik et al. 2015).	Yes
1054	1	Coral		Yes	Mass Spectrometer	Yes	Yes	Dechnik et al., 2017 Chutcharavan and Dutton, 2020		DE17-005	DE17-005-003	FIT2-10F_3	2017-01-01	No	Multiple analyses of same coral; this ample outside acceptable range for initial uranium isotope composition (delta 234Ui > 152 per mil); authors used open system age interpretation	No	Multiple analyses of the same coral; outside acceptable range for initial uranium isotopic composition (delta 234Ui = 145 +7/-5 per mil)	Chutcharavan and Dutton, 2020	Flexible protocol	No	Multiple analyses of same coral; this subsample outside acceptable range for initial uranium isotopic composition (delta 234Ui = 145 +/- 5 per mil)	Chutcharavan and Dutton, 2020	Strict protocol	Great Barrier Reef	Southern GBR	Fitzroy Reef	-23.6199	152.155	23°37'11.64"S	152°9'18.43"E	No		Mean Sea Level / General definition	Distance from top of drill core	-9.07	Not Reported	-9.07	1		No elevation uncertainty reported, so have arbitrarily assigned elevation uncertainty of +/- 1 m	Stable							cAB; cAA, aA1 and vermetid gastropods are also common throughout the core; solution unconformity present at the Holocene-Pleistocene boundary (7.4 m), indicating subaerial exposure (Dechnik et al. 2015).	Yes
1055	1	Coral		Yes	Mass Spectrometer	Yes	Yes	Dechnik et al., 2017 Chutcharavan and Dutton, 2020		DE17-006	DE17-006-001	FIT2-12G_1	2017-01-01	No	Multiple analyses of same coral; this ample outside acceptable range for initial uranium isotope composition (delta 234Ui > 152 per mil); authors used open system age interpretation	No	Multiple analyses of the same coral; outside acceptable range for initial uranium isotopic composition (delta 234Ui = 145 +7/-5 per mil)	Chutcharavan and Dutton, 2020	Flexible protocol	No	Multiple analyses of same coral; this subsample outside acceptable range for initial uranium isotopic composition (delta 234Ui = 145 +/- 5 per mil)	Chutcharavan and Dutton, 2020	Strict protocol	Great Barrier Reef	Southern GBR	Fitzroy Reef	-23.6199	152.155	23°37'11.64"S	152°9'18.43"E	No		Mean Sea Level / General definition	Distance from top of drill core	-11.68	Not Reported	-11.68	1		No elevation uncertainty reported, so have arbitrarily assigned elevation uncertainty of +/- 1 m	Stable							cAA.; cAB, aA1 and vermetid gastropods are also common throughout the core; solution unconformity present at the Holocene-Pleistocene boundary (7.4 m), indicating subaerial exposure (Dechnik et al. 2015).	Yes
1056	1	Coral		Yes	Mass Spectrometer	Yes	Yes	Dechnik et al., 2017 Chutcharavan and Dutton, 2020		DE17-006	DE17-006-002	FIT2-12G_2	2017-01-01	No	Multiple analyses of same coral; this ample outside acceptable range for initial uranium isotope composition (delta 234Ui > 152 per mil); authors used open system age interpretation	No	Multiple analyses of the same coral; outside acceptable range for initial uranium isotopic composition (delta 234Ui = 145 +7/-5 per mil)	Chutcharavan and Dutton, 2020	Flexible protocol	No	Multiple analyses of same coral; this subsample outside acceptable range for initial uranium isotopic composition (delta 234Ui = 145 +/- 5 per mil)	Chutcharavan and Dutton, 2020	Strict protocol	Great Barrier Reef	Southern GBR	Fitzroy Reef	-23.6199	152.155	23°37'11.64"S	152°9'18.43"E	No		Mean Sea Level / General definition	Distance from top of drill core	-11.68	Not Reported	-11.68	1		No elevation uncertainty reported, so have arbitrarily assigned elevation uncertainty of +/- 1 m	Stable							cAA.; cAB, aA1 and vermetid gastropods are also common throughout the core; solution unconformity present at the Holocene-Pleistocene boundary (7.4 m), indicating subaerial exposure (Dechnik et al. 2015).	Yes
1057	1	Coral		Yes	Mass Spectrometer	Yes	Yes	Dechnik et al., 2017 Chutcharavan and Dutton, 2020		DE17-006	DE17-006-003	FIT2-12G_3	2017-01-01	No	Multiple analyses of same coral; this ample outside acceptable range for initial uranium isotope composition (delta 234Ui > 152 per mil); authors used open system age interpretation	No	Multiple analyses of the same coral; outside acceptable range for initial uranium isotopic composition (delta 234Ui = 145 +7/-5 per mil)	Chutcharavan and Dutton, 2020	Flexible protocol	No	Multiple analyses of same coral; this subsample outside acceptable range for initial uranium isotopic composition (delta 234Ui = 145 +/- 5 per mil)	Chutcharavan and Dutton, 2020	Strict protocol	Great Barrier Reef	Southern GBR	Fitzroy Reef	-23.6199	152.155	23°37'11.64"S	152°9'18.43"E	No		Mean Sea Level / General definition	Distance from top of drill core	-11.68	Not Reported	-11.68	1		No elevation uncertainty reported, so have arbitrarily assigned elevation uncertainty of +/- 1 m	Stable							cAA.; cAB, aA1 and vermetid gastropods are also common throughout the core; solution unconformity present at the Holocene-Pleistocene boundary (7.4 m), indicating subaerial exposure (Dechnik et al. 2015).	Yes
1058	1	Coral		Yes	Mass Spectrometer	Yes	Yes	Dechnik et al., 2017 Chutcharavan and Dutton, 2020		DE17-007	DE17-007-001	FIT2-9H_1	2017-01-01	No	Multiple analyses of same coral; this ample outside acceptable range for initial uranium isotope composition (delta 234Ui > 152 per mil); authors used open system age interpretation	No	Multiple analyses of the same coral; outside acceptable range for initial uranium isotopic composition (delta 234Ui = 145 +7/-5 per mil)	Chutcharavan and Dutton, 2020	Flexible protocol	No	Multiple analyses of same coral; this subsample outside acceptable range for initial uranium isotopic composition (delta 234Ui = 145 +/- 5 per mil)	Chutcharavan and Dutton, 2020	Strict protocol	Great Barrier Reef	Southern GBR	Fitzroy Reef	-23.6199	152.155	23°37'11.64"S	152°9'18.43"E	No		Mean Sea Level / General definition	Distance from top of drill core	-8.25	Not Reported	-8.25	1		No elevation uncertainty reported, so have arbitrarily assigned elevation uncertainty of +/- 1 m	Stable							cAB; cAA, aA1 and vermetid gastropods are also common throughout the core; solution unconformity present at the Holocene-Pleistocene boundary (7.4 m), indicating subaerial exposure (Dechnik et al. 2015).	Yes
1059	1	Coral		Yes	Mass Spectrometer	Yes	Yes	Dechnik et al., 2017 Chutcharavan and Dutton, 2020		DE17-007	DE17-007-002	FIT2-9H_2	2017-01-01	No	Multiple analyses of same coral; this ample outside acceptable range for initial uranium isotope composition (delta 234Ui > 152 per mil); authors used open system age interpretation	No	Multiple analyses of the same coral; outside acceptable range for initial uranium isotopic composition (delta 234Ui = 145 +7/-5 per mil)	Chutcharavan and Dutton, 2020	Flexible protocol	No	Multiple analyses of same coral; this subsample outside acceptable range for initial uranium isotopic composition (delta 234Ui = 145 +/- 5 per mil)	Chutcharavan and Dutton, 2020	Strict protocol	Great Barrier Reef	Southern GBR	Fitzroy Reef	-23.6199	152.155	23°37'11.64"S	152°9'18.43"E	No		Mean Sea Level / General definition	Distance from top of drill core	-8.25	Not Reported	-8.25	1		No elevation uncertainty reported, so have arbitrarily assigned elevation uncertainty of +/- 1 m	Stable							cAB; cAA, aA1 and vermetid gastropods are also common throughout the core; solution unconformity present at the Holocene-Pleistocene boundary (7.4 m), indicating subaerial exposure (Dechnik et al. 2015).	Yes
1060	1	Coral		Yes	Mass Spectrometer	Yes	Yes	Dechnik et al., 2017 Chutcharavan and Dutton, 2020		DE17-007	DE17-007-003	FIT-2-9H_3	2017-01-01	No	Multiple analyses of same coral; this ample outside acceptable range for initial uranium isotope composition (delta 234Ui > 152 per mil); authors used open system age interpretation	No	Multiple analyses of the same coral; outside acceptable range for initial uranium isotopic composition (delta 234Ui = 145 +7/-5 per mil)	Chutcharavan and Dutton, 2020	Flexible protocol	No	Multiple analyses of same coral; this subsample outside acceptable range for initial uranium isotopic composition (delta 234Ui = 145 +/- 5 per mil)	Chutcharavan and Dutton, 2020	Strict protocol	Great Barrier Reef	Southern GBR	Fitzroy Reef	-23.6199	152.155	23°37'11.64"S	152°9'18.43"E	No		Mean Sea Level / General definition	Distance from top of drill core	-9.25	Not Reported	-9.25	1		No elevation uncertainty reported, so have arbitrarily assigned elevation uncertainty of +/- 1 m	Stable							cAB; cAA, aA1 and vermetid gastropods are also common throughout the core; solution unconformity present at the Holocene-Pleistocene boundary (7.4 m), indicating subaerial exposure (Dechnik et al. 2015).	Yes
1061	1	Coral		Yes	Mass Spectrometer	Yes	Yes	Dechnik et al., 2017 Chutcharavan and Dutton, 2020		DE17-008	DE17-008-001	FIT3-16C_1	2017-01-01	No	Multiple analyses of same coral; this ample outside acceptable range for initial uranium isotope composition (delta 234Ui > 152 per mil); authors used open system age interpretation	No	Multiple analyses of the same coral; outside acceptable range for initial uranium isotopic composition (delta 234Ui = 145 +7/-5 per mil)	Chutcharavan and Dutton, 2020	Flexible protocol	No	Multiple analyses of same coral; this subsample outside acceptable range for initial uranium isotopic composition (delta 234Ui = 145 +/- 5 per mil)	Chutcharavan and Dutton, 2020	Strict protocol	Great Barrier Reef	Southern GBR	Fitzroy Reef	-23.6199	152.155	23°37'11.64"S	152°9'18.43"E	No		Mean Sea Level / General definition	Distance from top of drill core	-10.97	Not Reported	-10.97	1		No elevation uncertainty reported, so have arbitrarily assigned elevation uncertainty of +/- 1 m	Stable							cAA and aA1 assemblages dominate. Coral assemblage cAC occurs at 10.6-11.2 m, which authors have interpreted as the same shallow paleo water depth (0-6 m) as the rest of the section, albeit in a more protected setting; solution unconformity exists at Holocene/Pleistocene boundary (10.2-10.6 m) and indicates prolonged sub-aerial exposure.	Yes
1062	1	Coral		Yes	Mass Spectrometer	Yes	Yes	Dechnik et al., 2017 Chutcharavan and Dutton, 2020		DE17-008	DE17-008-002	FIT3-16C_2	2017-01-01	No	Multiple analyses of same coral; this ample outside acceptable range for initial uranium isotope composition (delta 234Ui > 152 per mil); authors used open system age interpretation	No	Multiple analyses of the same coral; outside acceptable range for initial uranium isotopic composition (delta 234Ui = 145 +7/-5 per mil)	Chutcharavan and Dutton, 2020	Flexible protocol	No	Multiple analyses of same coral; this subsample outside acceptable range for initial uranium isotopic composition (delta 234Ui = 145 +/- 5 per mil)	Chutcharavan and Dutton, 2020	Strict protocol	Great Barrier Reef	Southern GBR	Fitzroy Reef	-23.6199	152.155	23°37'11.64"S	152°9'18.43"E	No		Mean Sea Level / General definition	Distance from top of drill core	-10.97	Not Reported	-10.97	1		No elevation uncertainty reported, so have arbitrarily assigned elevation uncertainty of +/- 1 m	Stable							cAA and aA1 assemblages dominate. Coral assemblage cAC occurs at 10.6-11.2 m, which authors have interpreted as the same shallow paleo water depth (0-6 m) as the rest of the section, albeit in a more protected setting; solution unconformity exists at Holocene/Pleistocene boundary (10.2-10.6 m) and indicates prolonged sub-aerial exposure.	Yes
1063	1	Coral		Yes	Mass Spectrometer	Yes	Yes	Dechnik et al., 2017 Chutcharavan and Dutton, 2020		DE17-008	DE17-008-003	FIT3-16C_3	2017-01-01	No	Multiple analyses of same coral; this ample outside acceptable range for initial uranium isotope composition (delta 234Ui > 152 per mil); authors used open system age interpretation	No	Multiple analyses of the same coral; outside acceptable range for initial uranium isotopic composition (delta 234Ui = 145 +7/-5 per mil)	Chutcharavan and Dutton, 2020	Flexible protocol	No	Multiple analyses of same coral; this subsample outside acceptable range for initial uranium isotopic composition (delta 234Ui = 145 +/- 5 per mil)	Chutcharavan and Dutton, 2020	Strict protocol	Great Barrier Reef	Southern GBR	Fitzroy Reef	-23.6199	152.155	23°37'11.64"S	152°9'18.43"E	No		Mean Sea Level / General definition	Distance from top of drill core	-10.97	Not Reported	-10.97	1		No elevation uncertainty reported, so have arbitrarily assigned elevation uncertainty of +/- 1 m	Stable							cAA and aA1 assemblages dominate. Coral assemblage cAC occurs at 10.6-11.2 m, which authors have interpreted as the same shallow paleo water depth (0-6 m) as the rest of the section, albeit in a more protected setting; solution unconformity exists at Holocene/Pleistocene boundary (10.2-10.6 m) and indicates prolonged sub-aerial exposure.	Yes
1064	1	Coral		Yes	Mass Spectrometer	Yes	Yes	Dechnik et al., 2017 Chutcharavan and Dutton, 2020		DE17-009	DE17-009-001	FIT3-17G_1	2017-01-01	No	Multiple analyses of same coral; this ample outside acceptable range for initial uranium isotope composition (delta 234Ui > 152 per mil); authors used open system age interpretation	No	Multiple analyses of the same coral; outside acceptable range for initial uranium isotopic composition (delta 234Ui = 145 +7/-5 per mil)	Chutcharavan and Dutton, 2020	Flexible protocol	No	Multiple analyses of same coral; this subsample outside acceptable range for initial uranium isotopic composition (delta 234Ui = 145 +/- 5 per mil)	Chutcharavan and Dutton, 2020	Strict protocol	Great Barrier Reef	Southern GBR	Fitzroy Reef	-23.6199	152.155	23°37'11.64"S	152°9'18.43"E	No		Mean Sea Level / General definition	Distance from top of drill core	-13.1	Not Reported	-13.1	1		No elevation uncertainty reported, so have arbitrarily assigned elevation uncertainty of +/- 1 m	Stable							cAA and aA1 assemblages dominate. Coral assemblage cAC occurs at 10.6-11.2 m, which authors have interpreted as the same shallow paleo water depth (0-6 m) as the rest of the section, albeit in a more protected setting; solution unconformity exists at Holocene/Pleistocene boundary (10.2-10.6 m) and indicates prolonged sub-aerial exposure.	Yes
1065	1	Coral		Yes	Mass Spectrometer	Yes	Yes	Dechnik et al., 2017 Chutcharavan and Dutton, 2020		DE17-009	DE17-009-002	FIT3-17G_2	2017-01-01	No	Multiple analyses of same coral; this ample outside acceptable range for initial uranium isotope composition (delta 234Ui > 152 per mil); authors used open system age interpretation	No	Multiple analyses of the same coral; outside acceptable range for initial uranium isotopic composition (delta 234Ui = 145 +7/-5 per mil)	Chutcharavan and Dutton, 2020	Flexible protocol	No	Multiple analyses of same coral; this subsample outside acceptable range for initial uranium isotopic composition (delta 234Ui = 145 +/- 5 per mil)	Chutcharavan and Dutton, 2020	Strict protocol	Great Barrier Reef	Southern GBR	Fitzroy Reef	-23.6199	152.155	23°37'11.64"S	152°9'18.43"E	No		Mean Sea Level / General definition	Distance from top of drill core	-13.1	Not Reported	-13.1	1		No elevation uncertainty reported, so have arbitrarily assigned elevation uncertainty of +/- 1 m	Stable							cAA and aA1 assemblages dominate. Coral assemblage cAC occurs at 10.6-11.2 m, which authors have interpreted as the same shallow paleo water depth (0-6 m) as the rest of the section, albeit in a more protected setting; solution unconformity exists at Holocene/Pleistocene boundary (10.2-10.6 m) and indicates prolonged sub-aerial exposure.	Yes
1066	1	Coral		Yes	Mass Spectrometer	Yes	Yes	Dechnik et al., 2017 Chutcharavan and Dutton, 2020		DE17-009	DE17-009-003	FIT3-17G_3	2017-01-01	No	Multiple analyses of same coral; this ample outside acceptable range for initial uranium isotope composition (delta 234Ui > 152 per mil); authors used open system age interpretation	No	Multiple analyses of the same coral; outside acceptable range for initial uranium isotopic composition (delta 234Ui = 145 +7/-5 per mil)	Chutcharavan and Dutton, 2020	Flexible protocol	No	Multiple analyses of same coral; this subsample outside acceptable range for initial uranium isotopic composition (delta 234Ui = 145 +/- 5 per mil)	Chutcharavan and Dutton, 2020	Strict protocol	Great Barrier Reef	Southern GBR	Fitzroy Reef	-23.6199	152.155	23°37'11.64"S	152°9'18.43"E	No		Mean Sea Level / General definition	Distance from top of drill core	-13.1	Not Reported	-13.1	1		No elevation uncertainty reported, so have arbitrarily assigned elevation uncertainty of +/- 1 m	Stable							cAA and aA1 assemblages dominate. Coral assemblage cAC occurs at 10.6-11.2 m, which authors have interpreted as the same shallow paleo water depth (0-6 m) as the rest of the section, albeit in a more protected setting; solution unconformity exists at Holocene/Pleistocene boundary (10.2-10.6 m) and indicates prolonged sub-aerial exposure.	Yes
1067	1	Coral		Yes	Mass Spectrometer	Yes	Yes	Dechnik et al., 2017 Chutcharavan and Dutton, 2020		DE17-010	DE17-010-001	OTI5-11F_1	2017-01-01	No	Multiple analyses of same coral; this ample outside acceptable range for initial uranium isotope composition (delta 234Ui > 152 per mil); authors used open system age interpretation	No	Multiple analyses of the same coral; this subsample calcite content >= 2 %; outside acceptable range for initial uranium isotopic composition (delta 234Ui = 145 +7/-5 per mil)	Chutcharavan and Dutton, 2020	Flexible protocol	No	Multiple analyses of same coral; this subsample calcite content >= 2 %; outside acceptable range for initial uranium isotopic composition (delta 234Ui = 145 +/- 5 per mil)	Chutcharavan and Dutton, 2020	Strict protocol	Great Barrier Reef	Southern GBR	One Tree Island	-23.5076	152.092	23°30'27.48"S	152°5'29.68"E	No		Mean Sea Level / General definition	Distance from top of drill core	-13.77	Not Reported	-13.77	1		No elevation uncertainty reported, so have arbitrarily assigned elevation uncertainty of +/- 1 m	Stable							aA1; transition from deeper (cAC) to shallow water coral assemblages (cAA) with associated vermetid gastropods, suggests a shallowing upwards sequence starting at 18 mbsf.	Yes
1068	1	Coral		Yes	Mass Spectrometer	Yes	Yes	Dechnik et al., 2017 Chutcharavan and Dutton, 2020		DE17-010	DE17-010-002	OTI5-11F_2	2017-01-01	No	Multiple analyses of same coral; this ample outside acceptable range for initial uranium isotope composition (delta 234Ui > 152 per mil); authors used open system age interpretation	No	Multiple analyses of the same coral; this subsample calcite content >= 2 %; outside acceptable range for initial uranium isotopic composition (delta 234Ui = 145 +7/-5 per mil)	Chutcharavan and Dutton, 2020	Flexible protocol	No	Multiple analyses of same coral; this subsample calcite content >= 2 %; outside acceptable range for initial uranium isotopic composition (delta 234Ui = 145 +/- 5 per mil)	Chutcharavan and Dutton, 2020	Strict protocol	Great Barrier Reef	Southern GBR	One Tree Island	-23.5076	152.092	23°30'27.48"S	152°5'29.68"E	No		Mean Sea Level / General definition	Distance from top of drill core	-13.77	Not Reported	-13.77	1		No elevation uncertainty reported, so have arbitrarily assigned elevation uncertainty of +/- 1 m	Stable							aA1; transition from deeper (cAC) to shallow water coral assemblages (cAA) with associated vermetid gastropods, suggests a shallowing upwards sequence starting at 18 mbsf.	Yes
1069	1	Coral		Yes	Mass Spectrometer	Yes	Yes	Dechnik et al., 2017 Chutcharavan and Dutton, 2020		DE17-010	DE17-010-003	OTI5-11F_3	2017-01-01	No	Multiple analyses of same coral; this ample outside acceptable range for initial uranium isotope composition (delta 234Ui > 152 per mil); authors used open system age interpretation	No	Multiple analyses of the same coral; this subsample calcite content >= 2 %; outside acceptable range for initial uranium isotopic composition (delta 234Ui = 145 +7/-5 per mil)	Chutcharavan and Dutton, 2020	Flexible protocol	No	Multiple analyses of same coral; this subsample calcite content >= 2 %; outside acceptable range for initial uranium isotopic composition (delta 234Ui = 145 +/- 5 per mil)	Chutcharavan and Dutton, 2020	Strict protocol	Great Barrier Reef	Southern GBR	One Tree Island	-23.5076	152.092	23°30'27.48"S	152°5'29.68"E	No		Mean Sea Level / General definition	Distance from top of drill core	-13.77	Not Reported	-13.77	1		No elevation uncertainty reported, so have arbitrarily assigned elevation uncertainty of +/- 1 m	Stable							aA1; transition from deeper (cAC) to shallow water coral assemblages (cAA) with associated vermetid gastropods, suggests a shallowing upwards sequence starting at 18 mbsf.	Yes
1070	1	Coral		Yes	Mass Spectrometer	Yes	Yes	Dechnik et al., 2017 Chutcharavan and Dutton, 2020		DE17-011	DE17-011-001	OTI6-15C_1	2017-01-01	No	Multiple analyses of same coral; this ample outside acceptable range for initial uranium isotope composition (delta 234Ui > 152 per mil); authors used open system age interpretation	No	Multiple analyses of the same coral; outside acceptable range for initial uranium isotopic composition (delta 234Ui = 145 +7/-5 per mil)	Chutcharavan and Dutton, 2020	Flexible protocol	No	Multiple analyses of same coral; this subsample outside acceptable range for initial uranium isotopic composition (delta 234Ui = 145 +/- 5 per mil)	Chutcharavan and Dutton, 2020	Strict protocol	Great Barrier Reef	Southern GBR	One Tree Island	-23.5076	152.092	23°30'27.48"S	152°5'29.68"E	No		Mean Sea Level / General definition	Distance from top of drill core	-18.78	Not Reported	-18.78	1		No elevation uncertainty reported, so have arbitrarily assigned elevation uncertainty of +/- 1 m	Stable							detrial assemblages of cAD, aA2 and abundant Halimeda, indicating paleo water depth of 0-30 m. However, transition to reef framework in this section of the core has led the authors to revise the paleo-water depth interpretation to 0-20 m	Yes
1071	1	Coral		Yes	Mass Spectrometer	Yes	Yes	Dechnik et al., 2017 Chutcharavan and Dutton, 2020		DE17-011	DE17-011-002	OTI6-15C_2	2017-01-01	No	Multiple analyses of same coral; this ample outside acceptable range for initial uranium isotope composition (delta 234Ui > 152 per mil); authors used open system age interpretation	No	Multiple analyses of the same coral; outside acceptable range for initial uranium isotopic composition (delta 234Ui = 145 +7/-5 per mil)	Chutcharavan and Dutton, 2020	Flexible protocol	No	Multiple analyses of same coral; this subsample outside acceptable range for initial uranium isotopic composition (delta 234Ui = 145 +/- 5 per mil)	Chutcharavan and Dutton, 2020	Strict protocol	Great Barrier Reef	Southern GBR	One Tree Island	-23.5076	152.092	23°30'27.48"S	152°5'29.68"E	No		Mean Sea Level / General definition	Distance from top of drill core	-18.78	Not Reported	-18.78	1		No elevation uncertainty reported, so have arbitrarily assigned elevation uncertainty of +/- 1 m	Stable							detrial assemblages of cAD, aA2 and abundant Halimeda, indicating paleo water depth of 0-30 m. However, transition to reef framework in this section of the core has led the authors to revise the paleo-water depth interpretation to 0-20 m	Yes
1072	1	Coral		Yes	Mass Spectrometer	Yes	Yes	Dechnik et al., 2017 Chutcharavan and Dutton, 2020		DE17-011	DE17-011-003	OTI6-15C_3	2017-01-01	No	Multiple analyses of same coral; this ample outside acceptable range for initial uranium isotope composition (delta 234Ui > 152 per mil); authors used open system age interpretation	No	Multiple analyses of the same coral; outside acceptable range for initial uranium isotopic composition (delta 234Ui = 145 +7/-5 per mil)	Chutcharavan and Dutton, 2020	Flexible protocol	No	Multiple analyses of same coral; this subsample outside acceptable range for initial uranium isotopic composition (delta 234Ui = 145 +/- 5 per mil)	Chutcharavan and Dutton, 2020	Strict protocol	Great Barrier Reef	Southern GBR	One Tree Island	-23.5076	152.092	23°30'27.48"S	152°5'29.68"E	No		Mean Sea Level / General definition	Distance from top of drill core	-18.78	Not Reported	-18.78	1		No elevation uncertainty reported, so have arbitrarily assigned elevation uncertainty of +/- 1 m	Stable							detrial assemblages of cAD, aA2 and abundant Halimeda, indicating paleo water depth of 0-30 m. However, transition to reef framework in this section of the core has led the authors to revise the paleo-water depth interpretation to 0-20 m	Yes
1369	1	Coral		Yes	Mass Spectrometer	Yes	Yes	Dutton et al., 2015 Chutcharavan and Dutton, 2020		DU15-001	DU15-001-001	SY-09a	2015-01-01	No	Multiple analyses of same coral with wide intra-sample age variation that otherwise pass screening criteria; this subsample outside of acceptable range for initial uranium isotopic composition (delta 234Ui = 147 +/- 5 per mil)	No	Multiple analyses of same coral; this subsample outside acceptable range for initial uranium isotopic composition (delta 234Ui = 145 +7/-5 per mil)	Chutcharavan and Dutton, 2020	Flexible protocol	No	Multiple analyses of same coral; this subsample outside acceptable range for initial uranium isotopic composition (delta 234Ui = 145 +/- 5 per mil)	Chutcharavan and Dutton, 2020	Strict protocol	Seychelles	La Digue Island	Grand Anse, Site 11	-4.37565	55.8426	-4.37565	55.8426	No		Mean Low Water Springs	Total station or Auto/hand level	3.9	0.2	3.4	0.2	3.9	MSL elevation calculated using tide gauge data for Port Victoria, Mahé, from Admiralty Tide Tables; in addition to total station/auto level, also used graduated staff	Stable							Near the base of the outcrop; in situ coral framework composed 30 cm thick interval dominated by encrusting and subassive Faviids	Yes
1370	1	Coral		Yes	Mass Spectrometer	Yes	Yes	Dutton et al., 2015 Chutcharavan and Dutton, 2020		DU15-001	DU15-001-002	SY-09b	2015-01-01	No	Multiple analyses of same coral with wide intra-sample age variation that otherwise pass screening criteria	No	Multiple analyses of the same coral; this subsample passes closed-system criteria but the age is not reproducible	Chutcharavan and Dutton, 2020	Flexible protocol	No	Multiple analyses of the same coral; this subsample passes closed-system criteria but the age is not reproducible	Chutcharavan and Dutton, 2020	Strict protocol	Seychelles	La Digue Island	Grand Anse, Site 11	-4.37565	55.8426	-4.37565	55.8426	No		Mean Low Water Springs	Total station or Auto/hand level	3.9	0.2	3.4	0.2	3.9	MSL elevation calculated using tide gauge data for Port Victoria, Mahé, from Admiralty Tide Tables; in addition to total station/auto level, also used graduated staff	Stable							Near the base of the outcrop; in situ coral framework composed 30 cm thick interval dominated by encrusting and subassive Faviids	Yes
1371	1	Coral		Yes	Mass Spectrometer	Yes	Yes	Dutton et al., 2015 Chutcharavan and Dutton, 2020		DU15-001	DU15-001-003	SY-09c	2015-01-01	No	Multiple analyses of same coral with wide intra-sample age variation that otherwise pass screening criteria	No	Multiple analyses of the same coral; this subsample passes closed-system criteria but the age is not reproducible	Chutcharavan and Dutton, 2020	Flexible protocol	No	Multiple analyses of the same coral; this subsample passes closed-system criteria but the age is not reproducible	Chutcharavan and Dutton, 2020	Strict protocol	Seychelles	La Digue Island	Grand Anse, Site 11	-4.37565	55.8426	-4.37565	55.8426	No		Mean Low Water Springs	Total station or Auto/hand level	3.9	0.2	3.4	0.2	3.9	MSL elevation calculated using tide gauge data for Port Victoria, Mahé, from Admiralty Tide Tables; in addition to total station/auto level, also used graduated staff	Stable							Near the base of the outcrop; in situ coral framework composed 30 cm thick interval dominated by encrusting and subassive Faviids	Yes
1372	1	Coral		Yes	Mass Spectrometer	Yes	Yes	Dutton et al., 2015 Chutcharavan and Dutton, 2020		DU15-002	DU15-002-001	SY-12a	2015-01-01	Yes		No	Multiple analyses of same coral; this subsample calcite content >= 2 %; outside acceptable range for initial uranium isotopic composition (delta 234Ui = 145 +7/-5 per mil)	Chutcharavan and Dutton, 2020	Flexible protocol	No	Multiple analyses of same coral; this subsample calcite content >= 2 %; outside acceptable range for initial uranium isotopic composition (delta 234Ui = 145 +/- 5 per mil)	Chutcharavan and Dutton, 2020	Strict protocol	Seychelles	La Digue Island	Grand Anse, Site 11	-4.37565	55.8426	-4.37565	55.8426	No		Mean Low Water Springs	Total station or Auto/hand level	8.138	0.2	7.64	0.2	8.138	MSL elevation calculated using tide gauge data for Port Victoria, Mahé, from Admiralty Tide Tables; in addition to total station/auto level, also used graduated staff	Stable							Shore-parallel section; 70 cm from top of the section	Yes
1373	1	Coral		Yes	Mass Spectrometer	Yes	Yes	Dutton et al., 2015 Chutcharavan and Dutton, 2020		DU15-002	DU15-002-002	SY-12b	2015-01-01	Yes		No	Multiple analyses of same coral; this subsample calcite content >= 2 %; outside acceptable range for initial uranium isotopic composition (delta 234Ui = 145 +7/-5 per mil)	Chutcharavan and Dutton, 2020	Flexible protocol	No	Multiple analyses of same coral; this subsample calcite content >= 2 %; outside acceptable range for initial uranium isotopic composition (delta 234Ui = 145 +/- 5 per mil)	Chutcharavan and Dutton, 2020	Strict protocol	Seychelles	La Digue Island	Grand Anse, Site 11	-4.37565	55.8426	-4.37565	55.8426	No		Mean Low Water Springs	Total station or Auto/hand level	8.138	0.2	7.64	0.2	8.138	MSL elevation calculated using tide gauge data for Port Victoria, Mahé, from Admiralty Tide Tables; in addition to total station/auto level, also used graduated staff	Stable							Shore-parallel section; 70 cm from top of the section	Yes
1374	1	Coral		Yes	Mass Spectrometer	Yes	Yes	Dutton et al., 2015 Chutcharavan and Dutton, 2020		DU15-002	DU15-002-003	SY-12c	2015-01-01	Yes		No	Multiple analyses of same coral; this subsample calcite content >= 2 %; outside acceptable range for initial uranium isotopic composition (delta 234Ui = 145 +7/-5 per mil)	Chutcharavan and Dutton, 2020	Flexible protocol	No	Multiple analyses of same coral; this subsample calcite content >= 2 %; outside acceptable range for initial uranium isotopic composition (delta 234Ui = 145 +/- 5 per mil)	Chutcharavan and Dutton, 2020	Strict protocol	Seychelles	La Digue Island	Grand Anse, Site 11	-4.37565	55.8426	-4.37565	55.8426	No		Mean Low Water Springs	Total station or Auto/hand level	8.138	0.2	7.64	0.2	8.138	MSL elevation calculated using tide gauge data for Port Victoria, Mahé, from Admiralty Tide Tables; in addition to total station/auto level, also used graduated staff	Stable							Shore-parallel section; 70 cm from top of the section	Yes
1375	1	Coral		Yes	Mass Spectrometer	Yes	Yes	Dutton et al., 2015 Chutcharavan and Dutton, 2020		DU15-003	DU15-003-001	SY-22a	2015-01-01	No	Multiple analyses of same coral with wide intra-sample age variation that otherwise pass screening criteria	No	Multiple analyses of same coral; this subsample passes closed-system criteria but the age is not reproducible; part of a diagenetic array	Chutcharavan and Dutton, 2020	Flexible protocol	No	Multiple analyses of same coral; this subsample passes closed-system criteria but the age is not reproducible; part of a diagenetic array	Chutcharavan and Dutton, 2020	Strict protocol	Seychelles	La Digue Island	Inland site (La Mere Soupape), Site 4, Outcrop A	-4.36348	55.8321	-4.36348	55.8321	No		Mean Low Water Springs	Total station or Auto/hand level	6.95	0.2	6.45	0.2	6.95	MSL elevation calculated using tide gauge data for Port Victoria, Mahé, from Admiralty Tide Tables; in addition to total station/auto level, also used graduated staff	Stable							Largest colony in section of Outcrop A; capped by cm-scale crusts of CAR (SY-21); likely very shallow	Yes
1376	1	Coral		Yes	Mass Spectrometer	Yes	Yes	Dutton et al., 2015 Chutcharavan and Dutton, 2020		DU15-003	DU15-003-002	SY-22b	2015-01-01	No	Multiple analyses of same coral with wide intra-sample age variation that otherwise pass screening criteria; this subsample outside of acceptable range for initial uranium isotopic composition (delta 234Ui = 147 +/- 5 per mil)	No	Multiple analyses of same coral; this subsample outside acceptable range for initial uranium isotopic composition (delta 234Ui = 145 +7/-5 per mil)	Chutcharavan and Dutton, 2020	Flexible protocol	No	Multiple analyses of same coral; this subsample outside acceptable range for initial uranium isotopic composition (delta 234Ui = 145 +/- 5 per mil)	Chutcharavan and Dutton, 2020	Strict protocol	Seychelles	La Digue Island	Inland site (La Mere Soupape), Site 4, Outcrop A	-4.36348	55.8321	-4.36348	55.8321	No		Mean Low Water Springs	Total station or Auto/hand level	6.95	0.2	6.45	0.2	6.95	MSL elevation calculated using tide gauge data for Port Victoria, Mahé, from Admiralty Tide Tables; in addition to total station/auto level, also used graduated staff	Stable							Largest colony in section of Outcrop A; capped by cm-scale crusts of CAR (SY-21); likely very shallow	Yes
1377	1	Coral		Yes	Mass Spectrometer	Yes	Yes	Dutton et al., 2015 Chutcharavan and Dutton, 2020		DU15-003	DU15-003-003	SY-22c	2015-01-01	No	Multiple analyses of same coral with wide intra-sample age variation that otherwise pass screening criteria	No	Multiple analyses of same coral; this subsample passes closed-system criteria but the age is not reproducible; part of a diagenetic array	Chutcharavan and Dutton, 2020	Flexible protocol	No	Multiple analyses of same coral; this subsample passes closed-system criteria but the age is not reproducible; part of a diagenetic array	Chutcharavan and Dutton, 2020	Strict protocol	Seychelles	La Digue Island	Inland site (La Mere Soupape), Site 4, Outcrop A	-4.36348	55.8321	-4.36348	55.8321	No		Mean Low Water Springs	Total station or Auto/hand level	6.95	0.2	6.45	0.2	6.95	MSL elevation calculated using tide gauge data for Port Victoria, Mahé, from Admiralty Tide Tables; in addition to total station/auto level, also used graduated staff	Stable							Largest colony in section of Outcrop A; capped by cm-scale crusts of CAR (SY-21); likely very shallow	Yes
1378	1	Coral		Yes	Mass Spectrometer	Yes	Yes	Dutton et al., 2015 Chutcharavan and Dutton, 2020		DU15-004	DU15-004-001	SY-24a	2015-01-01	No	Multiple analyses of same coral with wide intra-sample age variation that otherwise pass screening criteria	No	Multiple analyses of same coral; this subsample passes closed-system criteria but the age is not reproducible	Chutcharavan and Dutton, 2020	Flexible protocol	No	Multiple analyses of the same coral; this subsample 232Th concentration > 2 ppb	Chutcharavan and Dutton, 2020	Strict protocol	Seychelles	La Digue Island	Inland site (La Mere Soupape), Site 4, Outcrop A	-4.36348	55.8321	-4.36348	55.8321	No		Mean Low Water Springs	Total station or Auto/hand level	7.52	0.2	7.02	0.2	7.52	MSL elevation calculated using tide gauge data for Port Victoria, Mahé, from Admiralty Tide Tables; in addition to total station/auto level, also used graduated staff	Stable							Part of in situ encrusting complex of corals (Montipora & Cyphastrea), that overlies SY-21 (thick CAR) but is also overlain [by] more cm-scale CAR crusts; likely very shallow	Yes
1379	1	Coral		Yes	Mass Spectrometer	Yes	Yes	Dutton et al., 2015 Chutcharavan and Dutton, 2020		DU15-004	DU15-004-002	SY-24b	2015-01-01	No	Multiple analyses of same coral with wide intra-sample age variation that otherwise pass screening criteria	No	Multiple analyses of same coral; this subsample passes closed-system criteria but the age is not reproducible	Chutcharavan and Dutton, 2020	Flexible protocol	No	Multiple analyses of the same coral; this subsample 232Th concentration > 2 ppb	Chutcharavan and Dutton, 2020	Strict protocol	Seychelles	La Digue Island	Inland site (La Mere Soupape), Site 4, Outcrop A	-4.36348	55.8321	-4.36348	55.8321	No		Mean Low Water Springs	Total station or Auto/hand level	7.52	0.2	7.02	0.2	7.52	MSL elevation calculated using tide gauge data for Port Victoria, Mahé, from Admiralty Tide Tables; in addition to total station/auto level, also used graduated staff	Stable							Part of in situ encrusting complex of corals (Montipora & Cyphastrea), that overlies SY-21 (thick CAR) but is also overlain [by] more cm-scale CAR crusts; likely very shallow	Yes
1380	1	Coral		Yes	Mass Spectrometer	Yes	Yes	Dutton et al., 2015 Chutcharavan and Dutton, 2020		DU15-004	DU15-004-003	SY-24c	2015-01-01	No	Multiple analyses of same coral with wide intra-sample age variation that otherwise pass screening criteria; this subsample outside of acceptable range for initial uranium isotopic composition (delta 234Ui = 147 +/- 5 per mil)	No	Multiple analyses of the same coral; this subsample outside acceptable range for initial uranium isotopic composition (delta 234Ui = 145 +7/-5 per mil)	Chutcharavan and Dutton, 2020	Flexible protocol	No	Multiple analyses of the same coral; this subsample 232Th concentration > 2 ppb; outside acceptable range for initial uranium isotopic composition (delta 234Ui = 145 +/- 5 per mil)	Chutcharavan and Dutton, 2020	Strict protocol	Seychelles	La Digue Island	Inland site (La Mere Soupape), Site 4, Outcrop A	-4.36348	55.8321	-4.36348	55.8321	No		Mean Low Water Springs	Total station or Auto/hand level	7.52	0.2	7.02	0.2	7.52	MSL elevation calculated using tide gauge data for Port Victoria, Mahé, from Admiralty Tide Tables; in addition to total station/auto level, also used graduated staff	Stable							Part of in situ encrusting complex of corals (Montipora & Cyphastrea), that overlies SY-21 (thick CAR) but is also overlain [by] more cm-scale CAR crusts; likely very shallow	Yes
1381	1	Coral		Yes	Mass Spectrometer	Yes	Yes	Dutton et al., 2015 Chutcharavan and Dutton, 2020		DU15-005	DU15-005-001	SY-27a	2015-01-01	Yes		Yes		Chutcharavan and Dutton, 2020	Flexible protocol	Yes		Chutcharavan and Dutton, 2020	Strict protocol	Seychelles	La Digue Island	Inland site (La Mere Soupape), Site 4, Outcrop B	-4.36348	55.8321	-4.36348	55.8321	No		Mean Low Water Springs	Total station or Auto/hand level	5.95	0.2	5.45	0.2	5.95	MSL elevation calculated using tide gauge data for Port Victoria, Mahé, from Admiralty Tide Tables; in addition to total station/auto level, also used graduated staff	Stable							Largest colony in the section of Outcrop B, capped by 58-cm interval that is dominated by cm-scale crusts of CAR (SY-29), with abundant vermetids and trapped coarse clastic grains; likely very shallow, intertidal	Yes
1382	1	Coral		Yes	Mass Spectrometer	Yes	Yes	Dutton et al., 2015 Chutcharavan and Dutton, 2020		DU15-005	DU15-005-002	SY-27b	2015-01-01	Yes		Yes		Chutcharavan and Dutton, 2020	Flexible protocol	Yes		Chutcharavan and Dutton, 2020	Strict protocol	Seychelles	La Digue Island	Inland site (La Mere Soupape), Site 4, Outcrop B	-4.36348	55.8321	-4.36348	55.8321	No		Mean Low Water Springs	Total station or Auto/hand level	5.95	0.2	5.45	0.2	5.95	MSL elevation calculated using tide gauge data for Port Victoria, Mahé, from Admiralty Tide Tables; in addition to total station/auto level, also used graduated staff	Stable							Largest colony in the section of Outcrop B, capped by 58-cm interval that is dominated by cm-scale crusts of CAR (SY-29), with abundant vermetids and trapped coarse clastic grains; likely very shallow, intertidal	Yes
1383	1	Coral		Yes	Mass Spectrometer	Yes	Yes	Dutton et al., 2015 Chutcharavan and Dutton, 2020		DU15-005	DU15-005-003	SY-27c	2015-01-01	Yes		Yes		Chutcharavan and Dutton, 2020	Flexible protocol	Yes		Chutcharavan and Dutton, 2020	Strict protocol	Seychelles	La Digue Island	Inland site (La Mere Soupape), Site 4, Outcrop B	-4.36348	55.8321	-4.36348	55.8321	No		Mean Low Water Springs	Total station or Auto/hand level	5.95	0.2	5.45	0.2	5.95	MSL elevation calculated using tide gauge data for Port Victoria, Mahé, from Admiralty Tide Tables; in addition to total station/auto level, also used graduated staff	Stable							Largest colony in the section of Outcrop B, capped by 58-cm interval that is dominated by cm-scale crusts of CAR (SY-29), with abundant vermetids and trapped coarse clastic grains; likely very shallow, intertidal	Yes
1384	1	Coral		Yes	Mass Spectrometer	Yes	Yes	Dutton et al., 2015 Chutcharavan and Dutton, 2020		DU15-006	DU15-006-001	SY-36a	2015-01-01	Yes		Yes		Chutcharavan and Dutton, 2020	Flexible protocol	No	Multiple analyses of the same coral; this subsample calcite content >= 2 %; 232Th concentration > 2 ppb	Chutcharavan and Dutton, 2020	Strict protocol	Seychelles	La Digue Island	Inland site (La Mere Soupape), Site 4, Outcrop G	-4.36348	55.8321	-4.36348	55.8321	No		Mean Low Water Springs	Total station or Auto/hand level	6.14	0.2	5.64	0.2	6.14	MSL elevation calculated using tide gauge data for Port Victoria, Mahé, from Admiralty Tide Tables; in addition to total station/auto level, also used graduated staff	Stable							Part of in situ encrusting complex of corals (Cyphastrea, Pavona/Leptastrea, with SY-37), that overlies SY-32 characterized by the thick crusts of fruticose CAR and below that, directly plastering the granite wall, thick cm-scale crusts CAR with large and abundant vermetids; likely very shallow, intertidal	Yes
1385	1	Coral		Yes	Mass Spectrometer	Yes	Yes	Dutton et al., 2015 Chutcharavan and Dutton, 2020		DU15-006	DU15-006-002	SY-36b	2015-01-01	Yes		Yes		Chutcharavan and Dutton, 2020	Flexible protocol	No	Multiple analyses of the same coral; this subsample calcite content >= 2 %; 232Th concentration > 2 ppb	Chutcharavan and Dutton, 2020	Strict protocol	Seychelles	La Digue Island	Inland site (La Mere Soupape), Site 4, Outcrop G	-4.36348	55.8321	-4.36348	55.8321	No		Mean Low Water Springs	Total station or Auto/hand level	6.14	0.2	5.64	0.2	6.14	MSL elevation calculated using tide gauge data for Port Victoria, Mahé, from Admiralty Tide Tables; in addition to total station/auto level, also used graduated staff	Stable							Part of in situ encrusting complex of corals (Cyphastrea, Pavona/Leptastrea, with SY-37), that overlies SY-32 characterized by the thick crusts of fruticose CAR and below that, directly plastering the granite wall, thick cm-scale crusts CAR with large and abundant vermetids; likely very shallow, intertidal	Yes
1386	1	Coral		Yes	Mass Spectrometer	Yes	Yes	Dutton et al., 2015 Chutcharavan and Dutton, 2020		DU15-006	DU15-006-003	SY-36c	2015-01-01	No	Multiple analyses of same coral;this subsample [230Th/232Th] activity ratio < 500	No	Multiple analyses of the same coral; this subsample 232Th concentration > 12 ppb	Chutcharavan and Dutton, 2020	Flexible protocol	No	Multiple analyses of the same coral; this subsample calcite content >= 2 %; 232Th concentration > 2 ppb	Chutcharavan and Dutton, 2020	Strict protocol	Seychelles	La Digue Island	Inland site (La Mere Soupape), Site 4, Outcrop G	-4.36348	55.8321	-4.36348	55.8321	No		Mean Low Water Springs	Total station or Auto/hand level	6.14	0.2	5.64	0.2	6.14	MSL elevation calculated using tide gauge data for Port Victoria, Mahé, from Admiralty Tide Tables; in addition to total station/auto level, also used graduated staff	Stable							Part of in situ encrusting complex of corals (Cyphastrea, Pavona/Leptastrea, with SY-37), that overlies SY-32 characterized by the thick crusts of fruticose CAR and below that, directly plastering the granite wall, thick cm-scale crusts CAR with large and abundant vermetids; likely very shallow, intertidal	Yes
1387	1	Coral		Yes	Mass Spectrometer	Yes	Yes	Dutton et al., 2015 Chutcharavan and Dutton, 2020		DU15-007	DU15-007-001	SY-37a	2015-01-01	Yes		Yes		Chutcharavan and Dutton, 2020	Flexible protocol	No	Multiple analyses of the same coral; this subsample 232Th concentration > 2 ppb	Chutcharavan and Dutton, 2020	Strict protocol	Seychelles	La Digue Island	Inland site (La Mere Soupape), Site 4, Outcrop G	-4.36348	55.8321	-4.36348	55.8321	No		Mean Low Water Springs	Total station or Auto/hand level	6.21	0.2	5.71	0.2	6.21	MSL elevation calculated using tide gauge data for Port Victoria, Mahé, from Admiralty Tide Tables; in addition to total station/auto level, also used graduated staff	Stable							Part of in situ encrusting complex of corals with SY-36	Yes
1388	1	Coral		Yes	Mass Spectrometer	Yes	Yes	Dutton et al., 2015 Chutcharavan and Dutton, 2020		DU15-007	DU15-007-002	SY-37b	2015-01-01	No	Multiple analyses of same coral;this subsample [230Th/232Th] activity ratio < 500	No	Multiple analyses of the same coral; this subsample 232Th concentration > 12 ppb	Chutcharavan and Dutton, 2020	Flexible protocol	No	Multiple analyses of the same coral; this subsample 232Th concentration > 2 ppb	Chutcharavan and Dutton, 2020	Strict protocol	Seychelles	La Digue Island	Inland site (La Mere Soupape), Site 4, Outcrop G	-4.36348	55.8321	-4.36348	55.8321	No		Mean Low Water Springs	Total station or Auto/hand level	6.21	0.2	5.71	0.2	6.21	MSL elevation calculated using tide gauge data for Port Victoria, Mahé, from Admiralty Tide Tables; in addition to total station/auto level, also used graduated staff	Stable							Part of in situ encrusting complex of corals with SY-36	Yes
1389	1	Coral		Yes	Mass Spectrometer	Yes	Yes	Dutton et al., 2015 Chutcharavan and Dutton, 2020		DU15-007	DU15-007-003	SY-37c	2015-01-01	Yes		Yes		Chutcharavan and Dutton, 2020	Flexible protocol	No	Multiple analyses of the same coral; this subsample 232Th concentration > 2 ppb; outside acceptable range for initial uranium isotopic composition (delta 234Ui = 145 +/- 5 per mil)	Chutcharavan and Dutton, 2020	Strict protocol	Seychelles	La Digue Island	Inland site (La Mere Soupape), Site 4, Outcrop G	-4.36348	55.8321	-4.36348	55.8321	No		Mean Low Water Springs	Total station or Auto/hand level	6.21	0.2	5.71	0.2	6.21	MSL elevation calculated using tide gauge data for Port Victoria, Mahé, from Admiralty Tide Tables; in addition to total station/auto level, also used graduated staff	Stable							Part of in situ encrusting complex of corals with SY-36	Yes
1390	1	Coral		Yes	Mass Spectrometer	Yes	Yes	Dutton et al., 2015 Chutcharavan and Dutton, 2020		DU15-008	DU15-008-001	SY-41a	2015-01-01	Yes		Yes		Chutcharavan and Dutton, 2020	Flexible protocol	No	Multiple analyses of the same coral; this subsample passes closed-system criteria but the age is not reproducible	Chutcharavan and Dutton, 2020	Strict protocol	Seychelles	La Digue Island	Inland site (La Mere Soupape), Site 4, Outcrop G	-4.36348	55.8321	-4.36348	55.8321	No		Mean Low Water Springs	Total station or Auto/hand level	6.61	0.2	6.11	0.2	6.61	MSL elevation calculated using tide gauge data for Port Victoria, Mahé, from Admiralty Tide Tables; in addition to total station/auto level, also used graduated staff	Stable							Near the top of Outcrop G, close to thick cm-scale crusts of CAR that drape down from where they are attached to the granite wall; likely very shallow, intertidal	Yes
1391	1	Coral		Yes	Mass Spectrometer	Yes	Yes	Dutton et al., 2015 Chutcharavan and Dutton, 2020		DU15-008	DU15-008-002	SY-41b	2015-01-01	No	Multiple analyses of same coral;this subsample [230Th/232Th] activity ratio < 500	No	Multiple analyses of the same coral; this subsample 232Th concentration > 12 ppb; age not reproducible	Chutcharavan and Dutton, 2020	Flexible protocol	No	Multiple analyses of the same coral; this subsample 232Th concentration > 2 ppb	Chutcharavan and Dutton, 2020	Strict protocol	Seychelles	La Digue Island	Inland site (La Mere Soupape), Site 4, Outcrop G	-4.36348	55.8321	-4.36348	55.8321	No		Mean Low Water Springs	Total station or Auto/hand level	6.61	0.2	6.11	0.2	6.61	MSL elevation calculated using tide gauge data for Port Victoria, Mahé, from Admiralty Tide Tables; in addition to total station/auto level, also used graduated staff	Stable							Near the top of Outcrop G, close to thick cm-scale crusts of CAR that drape down from where they are attached to the granite wall; likely very shallow, intertidal	Yes
1392	1	Coral		Yes	Mass Spectrometer	Yes	Yes	Dutton et al., 2015 Chutcharavan and Dutton, 2020		DU15-008	DU15-008-003	SY-41c	2015-01-01	Yes		Yes		Chutcharavan and Dutton, 2020	Flexible protocol	No	Multiple analyses of the same coral; this subsample passes closed-system criteria but the age is not reproducible	Chutcharavan and Dutton, 2020	Strict protocol	Seychelles	La Digue Island	Inland site (La Mere Soupape), Site 4, Outcrop G	-4.36348	55.8321	-4.36348	55.8321	No		Mean Low Water Springs	Total station or Auto/hand level	6.61	0.2	6.11	0.2	6.61	MSL elevation calculated using tide gauge data for Port Victoria, Mahé, from Admiralty Tide Tables; in addition to total station/auto level, also used graduated staff	Stable							Near the top of Outcrop G, close to thick cm-scale crusts of CAR that drape down from where they are attached to the granite wall; likely very shallow, intertidal	Yes
1393	1	Coral		Yes	Mass Spectrometer	Yes	Yes	Dutton et al., 2015 Chutcharavan and Dutton, 2020		DU15-009	DU15-009-001	SY-52a	2015-01-01	No	Multiple analyses of same coral;this subsample [230Th/232Th] activity ratio < 500; outside of acceptable range for initial uranium isotopic composition (delta 234Ui = 147 +/- 5 per mil)	No	Multiple analyses of the same coral; this subsample 232Th concentration > 12 ppb; outside acceptable range for initial uranium isotopic composition (delta 234Ui = 145 +7/-5 per mil)	Chutcharavan and Dutton, 2020	Flexible protocol	No	Multiple analyses of the same coral; this subsample 232Th concentration > 2 ppb; outside acceptable range for initial uranium isotopic composition (delta 234Ui = 145 +/- 5 per mil)	Chutcharavan and Dutton, 2020	Strict protocol	Seychelles	La Digue Island	Anse Source D'Argent, Site 7	-4.36978	55.8268	-4.36978	55.8268	No		Mean Low Water Springs	Total station or Auto/hand level	7.96	0.2	7.46	0.2	7.96	MSL elevation calculated using tide gauge data for Port Victoria, Mahé, from Admiralty Tide Tables; in addition to total station/auto level, also used graduated staff	Stable							likely very shallow (intertidal), stratigraphically just below well-developed interlayered, thick CAR with vermetid gastropods	Yes
1394	1	Coral		Yes	Mass Spectrometer	Yes	Yes	Dutton et al., 2015 Chutcharavan and Dutton, 2020		DU15-009	DU15-009-002	SY-52b	2015-01-01	No	Multiple analyses of same coral;this subsample [230Th/232Th] activity ratio < 500; outside of acceptable range for initial uranium isotopic composition (delta 234Ui = 147 +/- 5 per mil)	No	Multiple analyses of the same coral; this subsample 232Th concentration > 12 ppb; outside acceptable range for initial uranium isotopic composition (delta 234Ui = 145 +7/-5 per mil)	Chutcharavan and Dutton, 2020	Flexible protocol	No	Multiple analyses of the same coral; this subsample 232Th concentration > 2 ppb; outside acceptable range for initial uranium isotopic composition (delta 234Ui = 145 +/- 5 per mil)	Chutcharavan and Dutton, 2020	Strict protocol	Seychelles	La Digue Island	Anse Source D'Argent, Site 7	-4.36978	55.8268	-4.36978	55.8268	No		Mean Low Water Springs	Total station or Auto/hand level	7.96	0.2	7.46	0.2	7.96	MSL elevation calculated using tide gauge data for Port Victoria, Mahé, from Admiralty Tide Tables; in addition to total station/auto level, also used graduated staff	Stable							likely very shallow (intertidal), stratigraphically just below well-developed interlayered, thick CAR with vermetid gastropods	Yes
1395	1	Coral		Yes	Mass Spectrometer	Yes	Yes	Dutton et al., 2015 Chutcharavan and Dutton, 2020		DU15-009	DU15-009-003	SY-52c	2015-01-01	No	Multiple analyses of same coral;this subsample [230Th/232Th] activity ratio < 500; outside of acceptable range for initial uranium isotopic composition (delta 234Ui = 147 +/- 5 per mil)	No	Multiple analyses of the same coral; this subsample 232Th concentration > 12 ppb; outside acceptable range for initial uranium isotopic composition (delta 234Ui = 145 +7/-5 per mil)	Chutcharavan and Dutton, 2020	Flexible protocol	No	Multiple analyses of the same coral; this subsample 232Th concentration > 2 ppb; outside acceptable range for initial uranium isotopic composition (delta 234Ui = 145 +/- 5 per mil)	Chutcharavan and Dutton, 2020	Strict protocol	Seychelles	La Digue Island	Anse Source D'Argent, Site 7	-4.36978	55.8268	-4.36978	55.8268	No		Mean Low Water Springs	Total station or Auto/hand level	7.96	0.2	7.46	0.2	7.96	MSL elevation calculated using tide gauge data for Port Victoria, Mahé, from Admiralty Tide Tables; in addition to total station/auto level, also used graduated staff	Stable							likely very shallow (intertidal), stratigraphically just below well-developed interlayered, thick CAR with vermetid gastropods	Yes
1396	1	Coral		Yes	Mass Spectrometer	Yes	Yes	Dutton et al., 2015 Chutcharavan and Dutton, 2020		DU15-010	DU15-010-001	SY-53a	2015-01-01	No	Multiple analyses of same coral with wide intra-sample age variation that otherwise pass screening criteria; this subsample [230Th/232Th] activity ratio < 500; this subsample outside of acceptable range for initial uranium isotopic composition (delta 234Ui = 147 +/- 5 per mil)	No	Multiple analyses of the same coral; this subsample part of diagenetic array	Chutcharavan and Dutton, 2020	Flexible protocol	No	Multiple analyses of the same coral; this subsample 232Th concentration > 2 ppb; outside acceptable range for initial uranium isotopic composition (delta 234Ui = 145 +/- 5 per mil)	Chutcharavan and Dutton, 2020	Strict protocol	Seychelles	La Digue Island	Anse Source D'Argent, Site 7	-4.36978	55.8268	-4.36978	55.8268	No		Mean Low Water Springs	Total station or Auto/hand level	7.86	0.2	7.36	0.2	7.86	MSL elevation calculated using tide gauge data for Port Victoria, Mahé, from Admiralty Tide Tables; in addition to total station/auto level, also used graduated staff	Stable							Close to rubble deposit at the top of the profile 3 but likely in situ, likely very shallow (intertidal), stratigraphically 10 cm below SY-52	Yes
1397	1	Coral		Yes	Mass Spectrometer	Yes	Yes	Dutton et al., 2015 Chutcharavan and Dutton, 2020		DU15-010	DU15-010-002	SY-53aa	2015-01-01	No	Multiple analyses of same coral with wide intra-sample age variation that otherwise pass screening criteria; this subsample [230Th/232Th] activity ratio < 500; this subsample outside of acceptable range for initial uranium isotopic composition (delta 234Ui = 147 +/- 5 per mil)	No	Multiple analyses of the same coral; this subsample part of diagenetic array	Chutcharavan and Dutton, 2020	Flexible protocol	No	Multiple analyses of the same coral; this subsample 232Th concentration > 2 ppb; outside acceptable range for initial uranium isotopic composition (delta 234Ui = 145 +/- 5 per mil)	Chutcharavan and Dutton, 2020	Strict protocol	Seychelles	La Digue Island	Anse Source D'Argent, Site 7	-4.36978	55.8268	-4.36978	55.8268	No		Mean Low Water Springs	Total station or Auto/hand level	7.86	0.2	7.36	0.2	7.86	MSL elevation calculated using tide gauge data for Port Victoria, Mahé, from Admiralty Tide Tables; in addition to total station/auto level, also used graduated staff	Stable							Close to rubble deposit at the top of the profile 3 but likely in situ, likely very shallow (intertidal), stratigraphically 10 cm below SY-52	Yes
1398	1	Coral		Yes	Mass Spectrometer	Yes	Yes	Dutton et al., 2015 Chutcharavan and Dutton, 2020		DU15-010	DU15-010-003	SY-53b	2015-01-01	No	Multiple analyses of same coral with wide intra-sample age variation that otherwise pass screening criteria; this subsample [230Th/232Th] activity ratio < 500; this subsample outside of acceptable range for initial uranium isotopic composition (delta 234Ui = 147 +/- 5 per mil)	No	Multiple analyses of the same coral; this subsample part of diagenetic array	Chutcharavan and Dutton, 2020	Flexible protocol	No	Multiple analyses of the same coral; this subsample 232Th concentration > 2 ppb; outside acceptable range for initial uranium isotopic composition (delta 234Ui = 145 +/- 5 per mil)	Chutcharavan and Dutton, 2020	Strict protocol	Seychelles	La Digue Island	Anse Source D'Argent, Site 7	-4.36978	55.8268	-4.36978	55.8268	No		Mean Low Water Springs	Total station or Auto/hand level	7.86	0.2	7.36	0.2	7.86	MSL elevation calculated using tide gauge data for Port Victoria, Mahé, from Admiralty Tide Tables; in addition to total station/auto level, also used graduated staff	Stable							Close to rubble deposit at the top of the profile 3 but likely in situ, likely very shallow (intertidal), stratigraphically 10 cm below SY-52	Yes
1399	1	Coral		Yes	Mass Spectrometer	Yes	Yes	Dutton et al., 2015 Chutcharavan and Dutton, 2020		DU15-010	DU15-010-004	SY-53bb	2015-01-01	No	Multiple analyses of same coral with wide intra-sample age variation that otherwise pass screening criteria; this subsample [230Th/232Th] activity ratio < 500; this subsample outside of acceptable range for initial uranium isotopic composition (delta 234Ui = 147 +/- 5 per mil)	No	Multiple analyses of the same coral; this subsample part of diagenetic array	Chutcharavan and Dutton, 2020	Flexible protocol	No	Multiple analyses of the same coral; this subsample 232Th concentration > 2 ppb; outside acceptable range for initial uranium isotopic composition (delta 234Ui = 145 +/- 5 per mil)	Chutcharavan and Dutton, 2020	Strict protocol	Seychelles	La Digue Island	Anse Source D'Argent, Site 7	-4.36978	55.8268	-4.36978	55.8268	No		Mean Low Water Springs	Total station or Auto/hand level	7.86	0.2	7.36	0.2	7.86	MSL elevation calculated using tide gauge data for Port Victoria, Mahé, from Admiralty Tide Tables; in addition to total station/auto level, also used graduated staff	Stable							Close to rubble deposit at the top of the profile 3 but likely in situ, likely very shallow (intertidal), stratigraphically 10 cm below SY-52	Yes
1400	1	Coral		Yes	Mass Spectrometer	Yes	Yes	Dutton et al., 2015 Chutcharavan and Dutton, 2020		DU15-010	DU15-010-005	SY-53c	2015-01-01	No	Multiple analyses of same coral with wide intra-sample age variation that otherwise pass screening criteria; this subsample [230Th/232Th] activity ratio < 500; this subsample outside of acceptable range for initial uranium isotopic composition (delta 234Ui = 147 +/- 5 per mil)	No	Multiple analyses of the same coral; this subsample part of diagenetic array	Chutcharavan and Dutton, 2020	Flexible protocol	No	Multiple analyses of the same coral; this subsample 232Th concentration > 2 ppb; outside acceptable range for initial uranium isotopic composition (delta 234Ui = 145 +/- 5 per mil)	Chutcharavan and Dutton, 2020	Strict protocol	Seychelles	La Digue Island	Anse Source D'Argent, Site 7	-4.36978	55.8268	-4.36978	55.8268	No		Mean Low Water Springs	Total station or Auto/hand level	7.86	0.2	7.36	0.2	7.86	MSL elevation calculated using tide gauge data for Port Victoria, Mahé, from Admiralty Tide Tables; in addition to total station/auto level, also used graduated staff	Stable							Close to rubble deposit at the top of the profile 3 but likely in situ, likely very shallow (intertidal), stratigraphically 10 cm below SY-52	Yes
1401	1	Coral		Yes	Mass Spectrometer	Yes	Yes	Dutton et al., 2015 Chutcharavan and Dutton, 2020		DU15-010	DU15-010-006	SY-53cc	2015-01-01	No	Multiple analyses of same coral with wide intra-sample age variation that otherwise pass screening criteria; this subsample outside of acceptable range for initial uranium isotopic composition (delta 234Ui = 147 +/- 5 per mil)	No	Multiple analyses of the same coral; this subsample part of diagenetic array	Chutcharavan and Dutton, 2020	Flexible protocol	No	Multiple analyses of the same coral; this subsample 232Th concentration > 2 ppb; outside acceptable range for initial uranium isotopic composition (delta 234Ui = 145 +/- 5 per mil)	Chutcharavan and Dutton, 2020	Strict protocol	Seychelles	La Digue Island	Anse Source D'Argent, Site 7	-4.36978	55.8268	-4.36978	55.8268	No		Mean Low Water Springs	Total station or Auto/hand level	7.86	0.2	7.36	0.2	7.86	MSL elevation calculated using tide gauge data for Port Victoria, Mahé, from Admiralty Tide Tables; in addition to total station/auto level, also used graduated staff	Stable							Close to rubble deposit at the top of the profile 3 but likely in situ, likely very shallow (intertidal), stratigraphically 10 cm below SY-52	Yes
1402	1	Coral		Yes	Mass Spectrometer	Yes	Yes	Dutton et al., 2015 Chutcharavan and Dutton, 2020		DU15-011	DU15-011-001	SY-56a	2015-01-01	No	Multiple analyses of same coral;this subsample [230Th/232Th] activity ratio < 500; outside of acceptable range for initial uranium isotopic composition (delta 234Ui = 147 +/- 5 per mil)	No	Multiple analyses of the same coral; this subsample 232Th concentration > 12 ppb	Chutcharavan and Dutton, 2020	Flexible protocol	No	Multiple analyses of the same coral; this subsample calcite content >= 2 %; 232Th concentration > 2 ppb; ouside acceptable range for initial uranium isotopic composition (delta 234Ui = 145 +/- 5 per mil)	Chutcharavan and Dutton, 2020	Strict protocol	Seychelles	La Digue Island	Anse Source D'Argent, Site 7	-4.36978	55.8268	-4.36978	55.8268	No		Mean Low Water Springs	Total station or Auto/hand level	7.41	0.2	6.91	0.2	7.41	MSL elevation calculated using tide gauge data for Port Victoria, Mahé, from Admiralty Tide Tables; in addition to total station/auto level, also used graduated staff	Stable							Part of in situ, coralgal framework from the top ~1.5 m of profile 3 that is dominated by massive and submassive Faviids, likely very shallow, intertidal	Yes
1403	1	Coral		Yes	Mass Spectrometer	Yes	Yes	Dutton et al., 2015 Chutcharavan and Dutton, 2020		DU15-011	DU15-011-002	SY-56b	2015-01-01	Yes		Yes		Chutcharavan and Dutton, 2020	Flexible protocol	No	Multiple analyses of the same coral; this subsample calcite content >= 2 %; 232Th concentration > 2 ppb	Chutcharavan and Dutton, 2020	Strict protocol	Seychelles	La Digue Island	Anse Source D'Argent, Site 7	-4.36978	55.8268	-4.36978	55.8268	No		Mean Low Water Springs	Total station or Auto/hand level	7.41	0.2	6.91	0.2	7.41	MSL elevation calculated using tide gauge data for Port Victoria, Mahé, from Admiralty Tide Tables; in addition to total station/auto level, also used graduated staff	Stable							Part of in situ, coralgal framework from the top ~1.5 m of profile 3 that is dominated by massive and submassive Faviids, likely very shallow, intertidal	Yes
1404	1	Coral		Yes	Mass Spectrometer	Yes	Yes	Dutton et al., 2015 Chutcharavan and Dutton, 2020		DU15-011	DU15-011-003	SY-56c	2015-01-01	Yes		Yes		Chutcharavan and Dutton, 2020	Flexible protocol	No	Multiple analyses of the same coral; this subsample calcite content >= 2 %; 232Th concentration > 2 ppb	Chutcharavan and Dutton, 2020	Strict protocol	Seychelles	La Digue Island	Anse Source D'Argent, Site 7	-4.36978	55.8268	-4.36978	55.8268	No		Mean Low Water Springs	Total station or Auto/hand level	7.41	0.2	6.91	0.2	7.41	MSL elevation calculated using tide gauge data for Port Victoria, Mahé, from Admiralty Tide Tables; in addition to total station/auto level, also used graduated staff	Stable							Part of in situ, coralgal framework from the top ~1.5 m of profile 3 that is dominated by massive and submassive Faviids, likely very shallow, intertidal	Yes
1405	1	Coral		Yes	Mass Spectrometer	Yes	Yes	Dutton et al., 2015 Chutcharavan and Dutton, 2020		DU15-012	DU15-012-001	SY-63a	2015-01-01	Yes		Yes		Chutcharavan and Dutton, 2020	Flexible protocol	No	Multiple analyses of the same coral; this subsample 232Th concentration > 2 ppb	Chutcharavan and Dutton, 2020	Strict protocol	Seychelles	La Digue Island	S. End of Anse Source d'Argent, site 8	-4.37308	55.8292	-4.37308	55.8292	No		Mean Low Water Springs	Total station or Auto/hand level	3.72	0.2	3.22	0.2	3.72	MSL elevation calculated using tide gauge data for Port Victoria, Mahé, from Admiralty Tide Tables; in addition to total station/auto level, also used graduated staff	Stable							Near base of an in situ, ~50 cm submassive and massive complex of corals, protected cave, outcrop is landward facing, rather than seaward facing as with all other outcrops	Yes
1406	1	Coral		Yes	Mass Spectrometer	Yes	Yes	Dutton et al., 2015 Chutcharavan and Dutton, 2020		DU15-012	DU15-012-002	SY-63b	2015-01-01	Yes		Yes		Chutcharavan and Dutton, 2020	Flexible protocol	No	Multiple analyses of the same coral; this subsample 232Th concentration > 2 ppb	Chutcharavan and Dutton, 2020	Strict protocol	Seychelles	La Digue Island	S. End of Anse Source d'Argent, site 8	-4.37308	55.8292	-4.37308	55.8292	No		Mean Low Water Springs	Total station or Auto/hand level	3.72	0.2	3.22	0.2	3.72	MSL elevation calculated using tide gauge data for Port Victoria, Mahé, from Admiralty Tide Tables; in addition to total station/auto level, also used graduated staff	Stable							Near base of an in situ, ~50 cm submassive and massive complex of corals, protected cave, outcrop is landward facing, rather than seaward facing as with all other outcrops	Yes
1407	1	Coral		Yes	Mass Spectrometer	Yes	Yes	Dutton et al., 2015 Chutcharavan and Dutton, 2020		DU15-012	DU15-012-003	SY-63c	2015-01-01	Yes		Yes		Chutcharavan and Dutton, 2020	Flexible protocol	No	Multiple analyses of the same coral; this subsample 232Th concentration > 2 ppb; outside acceptable range for initial uranium isotopic composition (delta 234Ui = 145 +/- 5 per mil)	Chutcharavan and Dutton, 2020	Strict protocol	Seychelles	La Digue Island	S. End of Anse Source d'Argent, site 8	-4.37308	55.8292	-4.37308	55.8292	No		Mean Low Water Springs	Total station or Auto/hand level	3.72	0.2	3.22	0.2	3.72	MSL elevation calculated using tide gauge data for Port Victoria, Mahé, from Admiralty Tide Tables; in addition to total station/auto level, also used graduated staff	Stable							Near base of an in situ, ~50 cm submassive and massive complex of corals, protected cave, outcrop is landward facing, rather than seaward facing as with all other outcrops	Yes
1408	1	Coral		Yes	Mass Spectrometer	Yes	Yes	Dutton et al., 2015 Chutcharavan and Dutton, 2020		DU15-013	DU15-013-001	SY-66a	2015-01-01	No	Multiple analyses of same coral;this subsample [230Th/232Th] activity ratio < 500	No	Multiple analyses of the same coral; this subsample 232Th concentration > 12 ppb	Chutcharavan and Dutton, 2020	Flexible protocol	No	Multiple analyses of the same coral; this subsample 232Th concentration > 2 ppb	Chutcharavan and Dutton, 2020	Strict protocol	Seychelles	Curieuse Island	North end of old turtle pond wall, Site 19	-4.28453	55.731	-4.28453	55.731	No		Mean Low Water Springs	Total station or Auto/hand level	5.82	0.2	5.32	0.2	5.82	MSL elevation calculated using tide gauge data for Port Victoria, Mahé, from Admiralty Tide Tables; in addition to total station/auto level, also used graduated staff	Stable							Interval characterized by thick cm-scale, interlayered CAR between in situ Stylophora colonies, CAR also thickened on branch tips; likely very shallow	Yes
1409	1	Coral		Yes	Mass Spectrometer	Yes	Yes	Dutton et al., 2015 Chutcharavan and Dutton, 2020		DU15-013	DU15-013-002	SY-66b	2015-01-01	No	Multiple analyses of same coral;this subsample [230Th/232Th] activity ratio < 500	No	Multiple analyses of the same coral; this subsample 232Th concentration > 12 ppb	Chutcharavan and Dutton, 2020	Flexible protocol	No	Multiple analyses of the same coral; this subsample 232Th concentration > 2 ppb	Chutcharavan and Dutton, 2020	Strict protocol	Seychelles	Curieuse Island	North end of old turtle pond wall, Site 19	-4.28453	55.731	-4.28453	55.731	No		Mean Low Water Springs	Total station or Auto/hand level	5.82	0.2	5.32	0.2	5.82	MSL elevation calculated using tide gauge data for Port Victoria, Mahé, from Admiralty Tide Tables; in addition to total station/auto level, also used graduated staff	Stable							Interval characterized by thick cm-scale, interlayered CAR between in situ Stylophora colonies, CAR also thickened on branch tips; likely very shallow	Yes
1410	1	Coral		Yes	Mass Spectrometer	Yes	Yes	Dutton et al., 2015 Chutcharavan and Dutton, 2020		DU15-013	DU15-013-003	SY-66c	2015-01-01	Yes		Yes		Chutcharavan and Dutton, 2020	Flexible protocol	No	Multiple analyses of the same coral; this subsample 232Th concentration > 2 ppb	Chutcharavan and Dutton, 2020	Strict protocol	Seychelles	Curieuse Island	North end of old turtle pond wall, Site 19	-4.28453	55.731	-4.28453	55.731	No		Mean Low Water Springs	Total station or Auto/hand level	5.82	0.2	5.32	0.2	5.82	MSL elevation calculated using tide gauge data for Port Victoria, Mahé, from Admiralty Tide Tables; in addition to total station/auto level, also used graduated staff	Stable							Interval characterized by thick cm-scale, interlayered CAR between in situ Stylophora colonies, CAR also thickened on branch tips; likely very shallow	Yes
1411	1	Coral		Yes	Mass Spectrometer	Yes	Yes	Dutton et al., 2015 Chutcharavan and Dutton, 2020		DU15-014	DU15-014-001	SY-68a	2015-01-01	No	Multiple analyses of same coral;this subsample [230Th/232Th] activity ratio < 500	No	Multiple analyses of the same coral; this subsample 232Th concentration > 12 ppb	Chutcharavan and Dutton, 2020	Flexible protocol	No	Multiple analyses of the same coral; this subsample 232Th concentration > 2 ppb	Chutcharavan and Dutton, 2020	Strict protocol	Seychelles	Curieuse Island	North end of old turtle pond wall, Site 19	-4.28453	55.731	-4.28453	55.731	No		Mean Low Water Springs	Total station or Auto/hand level	6.56	0.2	6.06	0.2	6.56	MSL elevation calculated using tide gauge data for Port Victoria, Mahé, from Admiralty Tide Tables; in addition to total station/auto level, also used graduated staff	Stable							Large well developed colony, some interlayered CAR on cm-scale crusts capping part of the top of the corall; likely very shallow	Yes
1412	1	Coral		Yes	Mass Spectrometer	Yes	Yes	Dutton et al., 2015 Chutcharavan and Dutton, 2020		DU15-014	DU15-014-002	SY-68b	2015-01-01	Yes		Yes		Chutcharavan and Dutton, 2020	Flexible protocol	No	Multiple analyses of the same coral; this subsample 232Th concentration > 2 ppb	Chutcharavan and Dutton, 2020	Strict protocol	Seychelles	Curieuse Island	North end of old turtle pond wall, Site 19	-4.28453	55.731	-4.28453	55.731	No		Mean Low Water Springs	Total station or Auto/hand level	6.56	0.2	6.06	0.2	6.56	MSL elevation calculated using tide gauge data for Port Victoria, Mahé, from Admiralty Tide Tables; in addition to total station/auto level, also used graduated staff	Stable							Large well developed colony, some interlayered CAR on cm-scale crusts capping part of the top of the corall; likely very shallow	Yes
1413	1	Coral		Yes	Mass Spectrometer	Yes	Yes	Dutton et al., 2015 Chutcharavan and Dutton, 2020		DU15-014	DU15-014-003	SY-68c	2015-01-01	Yes		Yes		Chutcharavan and Dutton, 2020	Flexible protocol	Yes		Chutcharavan and Dutton, 2020	Strict protocol	Seychelles	Curieuse Island	North end of old turtle pond wall, Site 19	-4.28453	55.731	-4.28453	55.731	No		Mean Low Water Springs	Total station or Auto/hand level	6.56	0.2	6.06	0.2	6.56	MSL elevation calculated using tide gauge data for Port Victoria, Mahé, from Admiralty Tide Tables; in addition to total station/auto level, also used graduated staff	Stable							Large well developed colony, some interlayered CAR on cm-scale crusts capping part of the top of the corall; likely very shallow	Yes
1414	1	Coral		Yes	Mass Spectrometer	Yes	Yes	Dutton et al., 2015 Chutcharavan and Dutton, 2020		DU15-015	DU15-015-001	SY-69a	2015-01-01	Yes		Yes		Chutcharavan and Dutton, 2020	Flexible protocol	No	Multiple analyses of the same coral; this subsample 232Th concentration > 2 ppb; outside acceptable range for initial uranium isotopic composition (delta 234Ui = 145 +/- 5 per mil)	Chutcharavan and Dutton, 2020	Strict protocol	Seychelles	Curieuse Island	North end of old turtle pond wall, Site 19	-4.28453	55.731	-4.28453	55.731	No		Mean Low Water Springs	Total station or Auto/hand level	6.22	0.2	5.72	0.2	6.22	MSL elevation calculated using tide gauge data for Port Victoria, Mahé, from Admiralty Tide Tables; in addition to total station/auto level, also used graduated staff	Stable							Growing off CAR that is attached to granite wall	Yes
1415	1	Coral		Yes	Mass Spectrometer	Yes	Yes	Dutton et al., 2015 Chutcharavan and Dutton, 2020		DU15-015	DU15-015-002	SY-69b	2015-01-01	No	Multiple analyses of same coral;this subsample [230Th/232Th] activity ratio < 500; outside of acceptable range for initial uranium isotopic composition (delta 234Ui = 147 +/- 5 per mil)	No	Multiple analyses of the same coral; this subsample outside acceptable range for initial uranium isotopic composition (delta 234Ui = 145 +7/-5 per mil)	Chutcharavan and Dutton, 2020	Flexible protocol	No	Multiple analyses of the same coral; this subsample 232Th concentration > 2 ppb; outside acceptable range for initial uranium isotopic composition (delta 234Ui = 145 +/- 5 per mil)	Chutcharavan and Dutton, 2020	Strict protocol	Seychelles	Curieuse Island	North end of old turtle pond wall, Site 19	-4.28453	55.731	-4.28453	55.731	No		Mean Low Water Springs	Total station or Auto/hand level	6.22	0.2	5.72	0.2	6.22	MSL elevation calculated using tide gauge data for Port Victoria, Mahé, from Admiralty Tide Tables; in addition to total station/auto level, also used graduated staff	Stable							Growing off CAR that is attached to granite wall	Yes
1416	1	Coral		Yes	Mass Spectrometer	Yes	Yes	Dutton et al., 2015 Chutcharavan and Dutton, 2020		DU15-015	DU15-015-003	SY-69c	2015-01-01	Yes		Yes		Chutcharavan and Dutton, 2020	Flexible protocol	No	Multiple analyses of the same coral; this subsample 232Th concentration > 2 ppb; outside acceptable range for initial uranium isotopic composition (delta 234Ui = 145 +/- 5 per mil)	Chutcharavan and Dutton, 2020	Strict protocol	Seychelles	Curieuse Island	North end of old turtle pond wall, Site 19	-4.28453	55.731	-4.28453	55.731	No		Mean Low Water Springs	Total station or Auto/hand level	6.22	0.2	5.72	0.2	6.22	MSL elevation calculated using tide gauge data for Port Victoria, Mahé, from Admiralty Tide Tables; in addition to total station/auto level, also used graduated staff	Stable							Growing off CAR that is attached to granite wall	Yes
2179	1	Coral		Yes	Mass spectrometer	Yes	Yes	Edwards et al., 1987 Chutcharavan and Dutton, 2020		ED87-008	ED87-008-001	AFM-20	1987-01-01	Yes		Yes		Chutcharavan and Dutton, 2020	Flexible protocol	No	Multiple analyses of the same coral; this subsample calcite content not reported	Chutcharavan and Dutton, 2020	Strict protocol	Barbados	Univ. West Indies (UWI) Transect		13.135	-59.6323	N/A	N/A	Yes	estimated using Google Earth and sitemap from Cutler et al., 2003 (EPSL)	Mean Sea Level / General definition	Topographic map and digital elevation models	58	3	58	3	58.3	no elevation uncertainty quoted, assigned arbitrary +/- 3 m elevation uncertainty; mllw elevation calculated using tidal data from Bridgetown, Barbados from Admiralty Tide Tables (2016), v. 2	Uplifting	0.38	Not Reported	0.426829	0.0904229	Used uplift rate based on highest LIG coral in UWI transect (~60 m) using 123 ka/ +7.5m benchmark	Rendezvous Hill Terrace	reef crest; rh 3 (Speed and Cheng 2004 [GSA Bulletin])	Yes
2168	1	Coral		Yes	Mass spectrometer	Yes	Yes	Edwards et al., 1997 Chutcharavan and Dutton, 2020		ED87-008	ED87-008-002	AFM-20	1997-01-01	Yes		No	Multiple analyses of the same coral; this subsample outside acceptable range for initial uranium isotopic composition (delta 234Ui = 145 +7/-5)	Chutcharavan and Dutton, 2020	Flexible protocol	No	Multiple analyses of the same coral; this subsample calcite content >= 2 %; outside acceptable range for initial uranium isotopic composition (delta 234Ui = 145 +/- 5 per mil)	Chutcharavan and Dutton, 2020	Strict protocol	Barbados	Univ. West Indies (UWI) Transect		13.135	-59.6323	N/A	N/A	Yes	estimated using Google Earth and sitemap from Cutler et al., 2003 (EPSL)	Mean Sea Level / General definition	Not reported	Not Reported	Not Reported	58	3	58.3	elevation used from Gallup et al., 1994 (Science); no elevation uncertainty quoted, assigned arbitrary +/- 3 m elevation uncertainty; mllw elevation calculated using tidal data from Bridgetown, Barbados from Admiralty Tide Tables (2016), v. 2	Uplifting		Not Reported	0.426829	0.0904229	Used uplift rate based on highest LIG coral in UWI transect (~60 m) using 123 ka/ +7.5m benchmark	Rendezvous Hill Terrace	reef crest; rh 3 (Speed and Cheng 2004 [GSA Bulletin])	Yes
2086	1	Coral		Yes	Mass spectrometer	Yes	Yes	Gallup et al., 1994 Chutcharavan and Dutton, 2020		ED87-008	ED87-008-003	AFM-20 (A)	1994-01-01	No	Multiple analyses of the same subsample; this subsample rejected because of high initial uranium isotopic composition	No	Multiple analyses of the same coral; this subsample outside acceptable range for initial uranium isotopic composition (delta 234Ui = 145 +7/-5 per mil)	Chutcharavan and Dutton, 2020	Flexible protocol	No	Multiple analyses of the same coral; this subsample outside acceptable range for initial uranium isotopic composition (delta 234Ui = 145 +/- 5 per mil)	Chutcharavan and Dutton, 2020	Strict protocol	Barbados	Univ. West Indies (UWI) Transect	originally reported as Clermont Nose transect	13.135	-59.6323	N/A	N/A	Yes	estimated using Google Earth and sitemap from Cutler et al., 2003 (EPSL)	Mean Sea Level / General definition	Not reported	58	Not Reported	58	3	58.3	no elevation uncertainty quoted, assigned arbitrary +/- 3 m elevation uncertainty; mllw elevation calculated using tidal data from Bridgetown, Barbados from Admiralty Tide Tables (2016), v. 2	Uplifting	0.53	0.04	0.426829	0.0904229	Used uplift rate based on highest LIG coral in UWI transect (~60 m) using 123 ka/ +7.5m benchmark; published uplift rate for UWI transect from Speed and Cheng 2004 (GSA Bulletin).	Rendezvous Hill Terrace	reef crest; rh 3 (Speed and Cheng 2004 [GSA Bulletin])	Yes
2087	1	Coral		Yes	Mass spectrometer	Yes	Yes	Gallup et al., 1994 Chutcharavan and Dutton, 2020		ED87-008	ED87-008-004	AFM-20 (B)	1994-01-01	No	Multiple analyses of the same subsample; this subsample rejected because of high initial uranium isotopic composition	No	Multiple analyses of the same coral; this subsample outside acceptable range for initial uranium isotopic composition (delta 234Ui = 145 +7/-5 per mil)	Chutcharavan and Dutton, 2020	Flexible protocol	No	Multiple analyses of the same coral; this subsample outside acceptable range for initial uranium isotopic composition (delta 234Ui = 145 +/- 5 per mil)	Chutcharavan and Dutton, 2020	Strict protocol	Barbados	Univ. West Indies (UWI) Transect	originally reported as Clermont Nose transect	13.135	-59.6323	N/A	N/A	Yes	estimated using Google Earth and sitemap from Cutler et al., 2003 (EPSL)	Mean Sea Level / General definition	Not reported	58	Not Reported	58	3	58.3	no elevation uncertainty quoted, assigned arbitrary +/- 3 m elevation uncertainty; mllw elevation calculated using tidal data from Bridgetown, Barbados from Admiralty Tide Tables (2016), v. 2	Uplifting	0.53	0.04	0.426829	0.0904229	Used uplift rate based on highest LIG coral in UWI transect (~60 m) using 123 ka/ +7.5m benchmark; published uplift rate for UWI transect from Speed and Cheng 2004 (GSA Bulletin).	Rendezvous Hill Terrace	reef crest; rh 3 (Speed and Cheng 2004 [GSA Bulletin])	Yes
2088	1	Coral		Yes	Mass spectrometer	Yes	Yes	Gallup et al., 1994 Chutcharavan and Dutton, 2020		ED87-008	ED87-008-005	AFM-20 (C)	1994-01-01	No	Multiple analyses of the same subsample; this subsample rejected because of high initial uranium isotopic composition	No	Multiple analyses of the same coral; this subsample outside acceptable range for initial uranium isotopic composition (delta 234Ui = 145 +7/-5 per mil)	Chutcharavan and Dutton, 2020	Flexible protocol	No	Multiple analyses of the same coral; this subsample outside acceptable range for initial uranium isotopic composition (delta 234Ui = 145 +/- 5 per mil)	Chutcharavan and Dutton, 2020	Strict protocol	Barbados	Univ. West Indies (UWI) Transect	originally reported as Clermont Nose transect	13.135	-59.6323	N/A	N/A	Yes	estimated using Google Earth and sitemap from Cutler et al., 2003 (EPSL)	Mean Sea Level / General definition	Not reported	58	Not Reported	58	3	58.3	no elevation uncertainty quoted, assigned arbitrary +/- 3 m elevation uncertainty; mllw elevation calculated using tidal data from Bridgetown, Barbados from Admiralty Tide Tables (2016), v. 2	Uplifting	0.53	0.04	0.426829	0.0904229	Used uplift rate based on highest LIG coral in UWI transect (~60 m) using 123 ka/ +7.5m benchmark; published uplift rate for UWI transect from Speed and Cheng 2004 (GSA Bulletin).	Rendezvous Hill Terrace	reef crest; rh 3 (Speed and Cheng 2004 [GSA Bulletin])	Yes
1611	1	Coral		Yes	Mass Spectrometer	Yes	Yes	Eisenhauer et al., 1996 Chutcharavan and Dutton, 2020		EI96-001	EI96-001-001	TBC5 #2	1996-01-01	Yes		Yes		Chutcharavan and Dutton, 2020	Flexible protocol	Yes		Chutcharavan and Dutton, 2020	Strict protocol	Western Australia	Houtman Abrolhos Islands	Turtle Bay, E. Wallabi Isl	-28.4325	113.737	N/A	N/A	Yes	estimated using Google Earth and sitemap from Fig. 1, Eisenhauer et al., 1996 (Geol. Rund.)	Mean Sea Level / General definition	Not reported	3.3	0.1	3.3	1	3.6	reported elevation +/- 0.1 m (presumably uncertainty in core): assigned arbitrary ±1 m uncertainty; mlws elevation calculated using data from the Australian National Tide Tables (ANTT)	Stable							reef framestone, drill core	Yes
1612	1	Coral		Yes	Mass Spectrometer	Yes	Yes	Eisenhauer et al., 1996 Chutcharavan and Dutton, 2020		EI96-001	EI96-001-002	TBC5	1996-01-01	Yes		Yes		Chutcharavan and Dutton, 2020	Flexible protocol	Yes		Chutcharavan and Dutton, 2020	Strict protocol	Western Australia	Houtman Abrolhos Islands	Turtle Bay, E. Wallabi Isl	-28.4325	113.737	N/A	N/A	Yes	estimated using Google Earth and sitemap from Fig. 1, Eisenhauer et al., 1996 (Geol. Rund.)	Mean Sea Level / General definition	Not reported	3.3	0.1	3.3	1	3.6	reported elevation +/- 0.1 m (presumably uncertainty in core): assigned arbitrary ±1 m uncertainty; mlws elevation calculated using data from the Australian National Tide Tables (ANTT)	Stable							reef framestone, drill core	Yes
1613	1	Coral		Yes	Mass Spectrometer	Yes	Yes	Eisenhauer et al., 1996 Chutcharavan and Dutton, 2020		EI96-002	EI96-002-001	TBC4	1996-01-01	Yes		Yes		Chutcharavan and Dutton, 2020	Flexible protocol	No	Single analysis; calcite content >= 2 %	Chutcharavan and Dutton, 2020	Strict protocol	Western Australia	Houtman Abrolhos Islands	Turtle Bay, E. Wallabi Isl	-28.4325	113.737	N/A	N/A	Yes	estimated using Google Earth and sitemap from Fig. 1, Eisenhauer et al., 1996 (Geol. Rund.)	Mean Sea Level / General definition	Not reported	3.3	0.1	3.3	1	3.6	reported elevation +/- 0.1 m (presumably uncertainty in core): assigned arbitrary ±1 m uncertainty; mlws elevation calculated using data from the Australian National Tide Tables (ANTT)	Stable							reef framestone, drill core	Yes
1614	1	Coral		Yes	Mass Spectrometer	Yes	Yes	Eisenhauer et al., 1996 Chutcharavan and Dutton, 2020		EI96-003	EI96-003-001	TBC6	1996-01-01	No	Single analysis; outside acceptable range for initial uranium isotopic composition (delta 234Ui greater than 160 ? or less than 140 ?)	No	Single analysis; calcite content ? 2 %; outside acceptable range for initial uranium isotopic composition (delta 234Ui = 145 +7/-5 ?)	Chutcharavan and Dutton, 2020	Flexible protocol	No	Single analysis; calcite content >= 2 %; outside acceptable range for initial uranium isotopic composition (delta 234Ui = 145 +/- 5 per mil)	Chutcharavan and Dutton, 2020	Strict protocol	Western Australia	Houtman Abrolhos Islands	Turtle Bay, E. Wallabi Isl	-28.4325	113.737	N/A	N/A	Yes	estimated using Google Earth and sitemap from Fig. 1, Eisenhauer et al., 1996 (Geol. Rund.)	Mean Sea Level / General definition	Not reported	1	0.1	1	1	1.3	reported elevation +/- 0.1 m (presumably uncertainty in core): assigned arbitrary ±1 m uncertainty; mlws elevation calculated using data from the Australian National Tide Tables (ANTT)	Stable							reef framestone, drill core	Yes
1615	1	Coral		Yes	Mass Spectrometer	Yes	Yes	Eisenhauer et al., 1996 Chutcharavan and Dutton, 2020		EI96-004	EI96-004-001	TBC8	1996-01-01	Yes		Yes		Chutcharavan and Dutton, 2020	Flexible protocol	No	Single analysis; outside acceptable range for initial uranium isotopic composition (delta 234Ui = 145 +/- 5 per mil)	Chutcharavan and Dutton, 2020	Strict protocol	Western Australia	Houtman Abrolhos Islands	Turtle Bay, E. Wallabi Isl	-28.4325	113.737	N/A	N/A	Yes	estimated using Google Earth and sitemap from Fig. 1, Eisenhauer et al., 1996 (Geol. Rund.)	Mean Sea Level / General definition	Not reported	-1.7	0.1	-1.7	1	-1.4	reported elevation +/- 0.1 m (presumably uncertainty in core): assigned arbitrary ±1 m uncertainty; mlws elevation calculated using data from the Australian National Tide Tables (ANTT)	Stable							reef framestone, drill core	Yes
1616	1	Coral		Yes	Mass Spectrometer	Yes	Yes	Eisenhauer et al., 1996 Chutcharavan and Dutton, 2020		EI96-005	EI96-005-001	TBC7	1996-01-01	Yes		Yes		Chutcharavan and Dutton, 2020	Flexible protocol	Yes		Chutcharavan and Dutton, 2020	Strict protocol	Western Australia	Houtman Abrolhos Islands	Turtle Bay, E. Wallabi Isl	-28.4325	113.737	N/A	N/A	Yes	estimated using Google Earth and sitemap from Fig. 1, Eisenhauer et al., 1996 (Geol. Rund.)	Mean Sea Level / General definition	Not reported	-0.6	0.1	-0.6	1	-0.3	reported elevation +/- 0.1 m (presumably uncertainty in core): assigned arbitrary ±1 m uncertainty; mlws elevation calculated using data from the Australian National Tide Tables (ANTT)	Stable							reef framestone, drill core	Yes
1617	1	Coral		Yes	Mass Spectrometer	Yes	Yes	Eisenhauer et al., 1996 Chutcharavan and Dutton, 2020		EI96-006	EI96-006-001	TBC9	1996-01-01	Yes		Yes		Chutcharavan and Dutton, 2020	Flexible protocol	Yes		Chutcharavan and Dutton, 2020	Strict protocol	Western Australia	Houtman Abrolhos Islands	Turtle Bay, E. Wallabi Isl	-28.4325	113.737	N/A	N/A	Yes	estimated using Google Earth and sitemap from Fig. 1, Eisenhauer et al., 1996 (Geol. Rund.)	Mean Sea Level / General definition	Not reported	-3.3	0.1	-3.3	1	-3	reported elevation +/- 0.1 m (presumably uncertainty in core): assigned arbitrary ±1 m uncertainty; mlws elevation calculated using data from the Australian National Tide Tables (ANTT)	Stable							reef framestone, drill core	Yes
1618	1	Coral		Yes	Mass Spectrometer	Yes	Yes	Eisenhauer et al., 1996 Chutcharavan and Dutton, 2020		EI96-007	EI96-007-001	TBC13	1996-01-01	No	Single analysis; outside acceptable range for initial uranium isotopic composition (delta 234Ui greater than 160 ? or less than 140 ?)	No	Single analysis; outside acceptable range for initial uranium isotopic composition (delta 234Ui = 145 +7/-5 ?)	Chutcharavan and Dutton, 2020	Flexible protocol	No	Single analysis; calcite content >= 2 %; outside acceptable range for initial uranium isotopic composition (delta 234Ui = 145 +/- 5 per mil)	Chutcharavan and Dutton, 2020	Strict protocol	Western Australia	Houtman Abrolhos Islands	Turtle Bay, E. Wallabi Isl	-28.4325	113.737	N/A	N/A	Yes	estimated using Google Earth and sitemap from Fig. 1, Eisenhauer et al., 1996 (Geol. Rund.)	Mean Sea Level / General definition	Not reported	-6	0.1	-6	1	-5.7	reported elevation +/- 0.1 m (presumably uncertainty in core): assigned arbitrary ±1 m uncertainty; mlws elevation calculated using data from the Australian National Tide Tables (ANTT)	Stable							reef framestone, drill core	Yes
1619	1	Coral		Yes	Mass Spectrometer	Yes	Yes	Eisenhauer et al., 1996 Chutcharavan and Dutton, 2020		EI96-008	EI96-008-001	TBC20	1996-01-01	No	Single analysis; outside acceptable range for initial uranium isotopic composition (delta 234Ui greater than 160 ? or less than 140 ?)	No	Single analysis; outside acceptable range for initial uranium isotopic composition (delta 234Ui = 145 +7/-5 ?)	Chutcharavan and Dutton, 2020	Flexible protocol	No	Single analysis; calcite content >= 2 %; outside acceptable range for initial uranium isotopic composition (delta 234Ui = 145 +/- 5 per mil)	Chutcharavan and Dutton, 2020	Strict protocol	Western Australia	Houtman Abrolhos Islands	Turtle Bay, E. Wallabi Isl	-28.4325	113.737	N/A	N/A	Yes	estimated using Google Earth and sitemap from Fig. 1, Eisenhauer et al., 1996 (Geol. Rund.)	Mean Sea Level / General definition	Not reported	-13.1	0.1	-13.1	1	-12.8	reported elevation +/- 0.1 m (presumably uncertainty in core): assigned arbitrary ±1 m uncertainty; mlws elevation calculated using data from the Australian National Tide Tables (ANTT)	Stable							reef framestone, drill core	Yes
23	1	Coral		Yes	Mass spectrometer	Yes	Yes	Fruitjier et al., 2000 Chutcharavan and Dutton, 2020		FR00-001	FR00-001-001	194F b	2000-01-01	No	Single analysis; outside acceptable range for initial uranium isotopic composition	No	Single analysis; 232Th concentration > 2 ppb; outside acceptable range for initial uranium isotopic composition (delta 234Ui = 145 +7/-5 per mil)	Chutcharavan and Dutton, 2020	Flexible protocol	No	Single analysis; 232Th concentration > 2 ppb; outside acceptable range for initial uranium isotopic composition (delta 234Ui = 145 +/- 5 per mil)	Chutcharavan and Dutton, 2020	Strict protocol	USA - Florida	Key Largo Formation	Mile marker 101	25.1089	-80.423	N/A	N/A	Yes		Mean High Tide (MHT)	Not reported	0.05	Not Reported	0.42	1	0.540728	Calculated using tidal data for Whale Harbor, Windley Key from NOAA; no elevation uncertainty quoted: assigned arbitrary ±1 m uncertainty	Stable							Not Reported	Yes
22	1	Coral		Yes	Mass spectrometer	Yes	Yes	Fruitjier et al., 2000 Chutcharavan and Dutton, 2020		FR00-002	FR00-002-001	194F a	2000-01-01	No	Single analysis; outside acceptable range for initial uranium isotopic composition	No	Single analysis; outside acceptable range for initial uranium isotopic composition (delta 234Ui = 145 +7/-5 per mil)	Chutcharavan and Dutton, 2020	Flexible protocol	No	Single analysis; outside acceptable range for initial uranium isotopic composition (delta 234Ui = 145 +/- 5 per mil)	Chutcharavan and Dutton, 2020	Strict protocol	USA - Florida	Key Largo Formation	Mile marker 101	25.1089	-80.423	N/A	N/A	Yes		Mean High Tide (MHT)	Not reported	0.05	Not Reported	0.42	1	0.540728	Calculated using tidal data for Whale Harbor, Windley Key from NOAA; no elevation uncertainty quoted: assigned arbitrary ±1 m uncertainty	Stable							Not Reported	Yes
21	1	Coral		Yes	Mass spectrometer	Yes	Yes	Fruitjier et al., 2000 Chutcharavan and Dutton, 2020		FR00-004	FR00-004-001	184C b	2000-01-01	No	Single analysis; outside acceptable range for initial uranium isotopic composition	No	Single analysis; 232Th concentration > 2 ppb; outside acceptable range for initial uranium isotopic composition (delta 234Ui = 145 +7/-5 per mil)	Chutcharavan and Dutton, 2020	Flexible protocol	No	Single analysis; 232Th concentration > 2 ppb; outside acceptable range for initial uranium isotopic composition (delta 234Ui = 145 +/- 5 per mil)	Chutcharavan and Dutton, 2020	Strict protocol	USA - Florida	Key Largo Formation	Mile marker 101	25.1089	-80.423	N/A	N/A	Yes		Mean High Tide (MHT)	Not reported	0.3	Not Reported	0.67	1	0.790728	Calculated using tidal data for Whale Harbor, Windley Key from NOAA; no elevation uncertainty quoted: assigned arbitrary ±1 m uncertainty	Stable							Not Reported	Yes
19	1	Coral		Yes	Mass spectrometer	Yes	Yes	Fruitjier et al., 2000 Chutcharavan and Dutton, 2020		FR00-005	FR00-005-001	132 E2	2000-01-01	No	Single analysis; outside acceptable range for initial uranium isotopic composition	No	Single analysis; outside acceptable range for initial uranium isotopic composition (delta 234Ui = 145 +7/-5 per mil)	Chutcharavan and Dutton, 2020	Flexible protocol	No	Single analysis; outside acceptable range for initial uranium isotopic composition (delta 234Ui = 145 +/- 5 per mil)	Chutcharavan and Dutton, 2020	Strict protocol	USA - Florida	Key Largo Formation	Mile marker 82	24.9185	-80.6349	N/A	N/A	Yes		Mean High Tide (MHT)	Not reported	0.4	Not Reported	0.77	1	0.890728	Calculated using tidal data for Whale Harbor, Windley Key from NOAA; no elevation uncertainty quoted: assigned arbitrary ±1 m uncertainty	Stable							Not Reported	Yes
20	1	Coral		Yes	Mass spectrometer	Yes	Yes	Fruitjier et al., 2000 Chutcharavan and Dutton, 2020		FR00-006	FR00-006-001	184C a	2000-01-01	No	Single analysis; outside acceptable range for initial uranium isotopic composition	No	Single analysis; outside acceptable range for initial uranium isotopic composition (delta 234Ui = 145 +7/-5 per mil)	Chutcharavan and Dutton, 2020	Flexible protocol	No	Single analysis; outside acceptable range for initial uranium isotopic composition (delta 234Ui = 145 +/- 5 per mil)	Chutcharavan and Dutton, 2020	Strict protocol	USA - Florida	Key Largo Formation	Mile marker 101	25.1089	-80.423	N/A	N/A	Yes		Mean High Tide (MHT)	Not reported	0.3	Not Reported	0.67	1	0.790728	Calculated using tidal data for Whale Harbor, Windley Key from NOAA; no elevation uncertainty quoted: assigned arbitrary ±1 m uncertainty	Stable							Not Reported	Yes
18	1	Coral		Yes	Mass spectrometer	Yes	Yes	Fruitjier et al., 2000 Chutcharavan and Dutton, 2020		FR00-007	FR00-007-001	132 E1	2000-01-01	No	Single analysis; outside acceptable range for initial uranium isotopic composition	No	Single analysis; outside acceptable range for initial uranium isotopic composition (delta 234Ui = 145 +7/-5 per mil)	Chutcharavan and Dutton, 2020	Flexible protocol	No	Single analysis; outside acceptable range for initial uranium isotopic composition (delta 234Ui = 145 +/- 5 per mil)	Chutcharavan and Dutton, 2020	Strict protocol	USA - Florida	Key Largo Formation	Mile marker 82	24.9185	-80.6349	N/A	N/A	Yes		Mean High Tide (MHT)	Not reported	0.4	Not Reported	0.77	1	0.890728	Calculated using tidal data for Whale Harbor, Windley Key from NOAA; no elevation uncertainty quoted: assigned arbitrary ±1 m uncertainty	Stable							Not Reported	Yes
26	1	Coral		Yes	Mass spectrometer	Yes	Yes	Fruitjier et al., 2000 Chutcharavan and Dutton, 2020		FR00-008	FR00-008-001	224I E	2000-01-01	No	Single analysis; outside acceptable range for initial uranium isotopic composition	No	Single analysis; calcite content >= 2 %; outside acceptable range for initial uranium isotopic composition (delta 234Ui = 145 +7/-5 per mil)	Chutcharavan and Dutton, 2020	Flexible protocol	No	Single analysis; calcite content >= 2 %; outside acceptable range for initial uranium isotopic composition (delta 234Ui = 145 +/- 5 per mil)	Chutcharavan and Dutton, 2020	Strict protocol	USA - Florida	Key Largo Formation	Windley Key quarry	24.95	-80.5959	N/A	N/A	Yes		Mean High Tide (MHT)	Topographic map and digital elevation models	3.35	Not Reported	3.72	1	3.84073	Calculated using tidal data for Whale Harbor, Windley Key from NOAA; no elevation uncertainty quoted: assigned arbitrary ±1 m uncertainty	Stable							Not Reported	Yes
27	1	Coral		Yes	Mass spectrometer	Yes	Yes	Fruitjier et al., 2000 Chutcharavan and Dutton, 2020		FR00-009	FR00-009-001	224II V	2000-01-01	No	Single analysis; outside acceptable range for initial uranium isotopic composition	No	Single analysis; calcite content ? 2 %; outside acceptable range for initial uranium isotopic composition (delta 234Ui = 145 +7/-5 ?)	Chutcharavan and Dutton, 2020	Flexible protocol	No	Single analysis; calcite content >= 2 %; outside acceptable range for initial uranium isotopic composition (delta 234Ui = 145 +/- 5 per mil)	Chutcharavan and Dutton, 2020	Strict protocol	USA - Florida	Key Largo Formation	Windley Key quarry	24.95	-80.5959	N/A	N/A	Yes		Mean High Tide (MHT)	Topographic map and digital elevation models	3.35	Not Reported	3.7249	1	3.84073	Calculated using tidal data for Whale Harbor, Windley Key from NOAA; no elevation uncertainty quoted: assigned arbitrary ±1 m uncertainty	Stable							Not Reported	Yes
28	1	Coral		Yes	Mass spectrometer	Yes	Yes	Fruitjier et al., 2000 Chutcharavan and Dutton, 2020		FR00-010	FR00-010-001	224II X	2000-01-01	No	Single analysis; outside acceptable range for initial uranium isotopic composition	No	Single analysis; calcite content ? 2 %; outside acceptable range for initial uranium isotopic composition (delta 234Ui = 145 +7/-5 ?)	Chutcharavan and Dutton, 2020	Flexible protocol	No	Single analysis; calcite content >= 2 %; outside acceptable range for initial uranium isotopic composition (delta 234Ui = 145 +/- 5 per mil)	Chutcharavan and Dutton, 2020	Strict protocol	USA - Florida	Key Largo Formation	Windley Key quarry	24.95	-80.5959	N/A	N/A	Yes		Mean High Tide (MHT)	Topographic map and digital elevation models	3.35	Not Reported	3.7249	1	3.84073	Calculated using tidal data for Whale Harbor, Windley Key from NOAA; no elevation uncertainty quoted: assigned arbitrary ±1 m uncertainty	Stable							Not Reported	Yes
25	1	Coral		Yes	Mass spectrometer	Yes	Yes	Fruitjier et al., 2000 Chutcharavan and Dutton, 2020		FR00-011	FR00-011-001	222V	2000-01-01	No	Single analysis; outside acceptable range for initial uranium isotopic composition	No	Single analysis; outside acceptable range for initial uranium isotopic composition (delta 234Ui = 145 +7/-5 ?)	Chutcharavan and Dutton, 2020	Flexible protocol	No	Single analysis; outside acceptable range for initial uranium isotopic composition (delta 234Ui = 145 +/- 5 per mil)	Chutcharavan and Dutton, 2020	Strict protocol	USA - Florida	Key Largo Formation	Windley Key quarry	24.95	-80.5959	N/A	N/A	Yes		Mean High Tide (MHT)	Topographic map and digital elevation models	3.05	Not Reported	3.4249	1	3.54073	Calculated using tidal data for Whale Harbor, Windley Key from NOAA; no elevation uncertainty quoted: assigned arbitrary ±1 m uncertainty	Stable							Not Reported	Yes
24	1	Coral		Yes	Mass spectrometer	Yes	Yes	Fruitjier et al., 2000 Chutcharavan and Dutton, 2020		FR00-012	FR00-012-001	222 X	2000-01-01	No	Single analysis; outside acceptable range for initial uranium isotopic composition	No	Single analysis; outside acceptable range for initial uranium isotopic composition (delta 234Ui = 145 +7/-5 ?)	Chutcharavan and Dutton, 2020	Flexible protocol	No	Single analysis; outside acceptable range for initial uranium isotopic composition (delta 234Ui = 145 +/- 5 per mil)	Chutcharavan and Dutton, 2020	Strict protocol	USA - Florida	Key Largo Formation	Windley Key quarry	24.95	-80.5959	N/A	N/A	Yes		Mean High Tide (MHT)	Topographic map and digital elevation models	3.05	Not Reported	3.4249	1	3.54073	Calculated using tidal data for Whale Harbor, Windley Key from NOAA; no elevation uncertainty quoted: assigned arbitrary ±1 m uncertainty	Stable							Not Reported	Yes
1266	1	Coral		Yes	Mass Spectrometer	Yes	Yes	Frank et al., 2006 Chutcharavan and Dutton, 2020		FR06-007	FR06-007-001	AM1-15.2A	2006-01-01	No	Single analysis; all MIS 5e corals from this study were considered altered because of their U and Th isotope systematics	No	Single analysis; outside acceptable range for initial uranium isotopic composition (delta 234Ui = 145 +7/-5 ?)	Chutcharavan and Dutton, 2020	Flexible protocol	No	Single analysis; outside acceptable range for initial uranium isotopic composition (delta 234Ui = 145 +/- 5 per mil)	Chutcharavan and Dutton, 2020	Strict protocol	New Caledonia Island	Amedee Inlet	Amedee reef; core AM1	-22.4762	166.469	N/A	N/A	Yes	used Fig. 1 from Frank et al., 2006 (EPSL) and Google Earth	Mean Low Tide (MLT)	Not reported	-15.2	Not Reported	-13.7	1	-13.2	no elevation uncertainty quoted: assigned arbitrary ±1 m uncertainty; mlw/mlws elevation estimated using mean low tide level from Fig. 2 in Frank et al., 2006 (EPSL); reported elevation is relative to top of core. MSL estimated using MLLW estimate from IMCalc, Lorscheid and Rovere, 2019. Reported elevation is relative to top of core	Subsiding	-0.16	0.04	-0.16	0.04	Frank et al., 2006 (EPSL) used open-system ages calculated from the Thompson et al. 2003 EPSL model when determining uplift rates		coral and coralline algal framework	Yes
1267	1	Coral		Yes	Mass Spectrometer	Yes	Yes	Frank et al., 2006 Chutcharavan and Dutton, 2020		FR06-008	FR06-008-001	AM1-14P	2006-01-01	No	Single analysis; all MIS 5e corals from this study were considered altered because of their U and Th isotope systematics	No	Single analysis; outside acceptable range for initial uranium isotopic composition (delta 234Ui = 145 +7/-5 per mil)	Chutcharavan and Dutton, 2020	Flexible protocol	No	Single analysis; outside acceptable range for initial uranium isotopic composition (delta 234Ui = 145 +/- 5 per mil)	Chutcharavan and Dutton, 2020	Strict protocol	New Caledonia Island	Amedee Inlet	Amedee reef; core AM1	-22.4762	166.469	N/A	N/A	Yes	used Fig. 1 from Frank et al., 2006 (EPSL) and Google Earth	Mean Low Tide (MLT)	Not reported	-14	Not Reported	-12.5	1	-12	no elevation uncertainty quoted: assigned arbitrary ±1 m uncertainty; mlw/mlws elevation estimated using mean low tide level from Fig. 2 in Frank et al., 2006 (EPSL); reported elevation is relative to top of core. MSL estimated using MLLW estimate from IMCalc, Lorscheid and Rovere, 2019. Reported elevation is relative to top of core	Subsiding	-0.16	0.04	-0.16	0.04	Frank et al., 2006 (EPSL) used open-system ages calculated from the Thompson et al. 2003 EPSL model when determining uplift rates		coral and coralline algal framework	Yes
1268	1	Coral		Yes	Mass Spectrometer	Yes	Yes	Frank et al., 2006 Chutcharavan and Dutton, 2020		FR06-009	FR06-009-001	AM1-21.15A	2006-01-01	No	Single analysis; all MIS 5e corals from this study were considered altered because of their U and Th isotope systematics	No	Single analysis; calcite content >= 2 %; outside acceptable range for initial uranium isotopic composition (delta 234Ui = 145 +7/-5 per mil)	Chutcharavan and Dutton, 2020	Flexible protocol	No	Single analysis; calcite content >= 2 %; outside acceptable range for initial uranium isotopic composition (delta 234Ui = 145 +/- 5 per mil)	Chutcharavan and Dutton, 2020	Strict protocol	New Caledonia Island	Amedee Inlet	Amedee reef; core AM1	-22.4762	166.469	N/A	N/A	Yes	used Fig. 1 from Frank et al., 2006 (EPSL) and Google Earth	Mean Low Tide (MLT)	Not reported	-21.15	Not Reported	-19.65	1	-19.15	no elevation uncertainty quoted: assigned arbitrary ±1 m uncertainty; mlw/mlws elevation estimated using mean low tide level from Fig. 2 in Frank et al., 2006 (EPSL); reported elevation is relative to top of core. MSL estimated using MLLW estimate from IMCalc, Lorscheid and Rovere, 2019. Reported elevation is relative to top of core	Subsiding	-0.16	0.04	-0.16	0.04	Frank et al., 2006 (EPSL) used open-system ages calculated from the Thompson et al. 2003 EPSL model when determining uplift rates		coral and coralline algal framework	Yes
1269	1	Coral		Yes	Mass Spectrometer	Yes	Yes	Frank et al., 2006 Chutcharavan and Dutton, 2020		FR06-010	FR06-010-001	AM5-50As	2006-01-01	No	Single analysis; all MIS 5e corals from this study were considered altered because of their U and Th isotope systematics	No	Single analysis; calcite content >= 2 %; 232Th concentration > 2 ppb; outside acceptable range for initial uranium isotopic composition (delta 234Ui = 145 +7/-5 per mil)	Chutcharavan and Dutton, 2020	Flexible protocol	No	Single analysis; calcite content >= 2 %; detrital 232Th content > 2 ppb; outside acceptable range for initial uranium isotopic composition (delta 234Ui = 145 +/- 5 per mil)	Chutcharavan and Dutton, 2020	Strict protocol	New Caledonia Island	Amedee Inlet	Amedee reef; core AM5	-22.4783	166.466	N/A	N/A	Yes	used Fig. 1 from Frank et al., 2006 (EPSL) and Google Earth	Mean Low Tide (MLT)	Not reported	-31.2	Not Reported	-28.58	1	-28.08	no elevation uncertainty quoted: assigned arbitrary ±1 m uncertainty; mlw/mlws elevation estimated using mean low tide level from Fig. 2 in Frank et al., 2006 (EPSL); reported elevation is relative to top of core. MSL estimated using MLLW estimate from IMCalc, Lorscheid and Rovere, 2019. Reported elevation is relative to top of core	Subsiding	-0.16	0.04	-0.16	0.04	Frank et al., 2006 (EPSL) used open-system ages calculated from the Thompson et al. 2003 EPSL model when determining uplift rates		coral and coralline algal framework	Yes
1270	1	Coral		Yes	Mass Spectrometer	Yes	Yes	Frank et al., 2006 Chutcharavan and Dutton, 2020		FR06-012	FR06-012-001	AM1-12.4A	2006-01-01	No	Single analysis; all MIS 5e corals from this study were considered altered because of their U and Th isotope systematics	No	Single analysis; calcite content >= 2 %; outside acceptable range for initial uranium isotopic composition (delta 234Ui = 145 +7/-5 per mil)	Chutcharavan and Dutton, 2020	Flexible protocol	No	Single analysis; calcite content >= 2 %; outside acceptable range for initial uranium isotopic composition (delta 234Ui = 145 +/- 5 per mil)	Chutcharavan and Dutton, 2020	Strict protocol	New Caledonia Island	Amedee Inlet	Amedee reef; core AM1	-22.4762	166.469	N/A	N/A	Yes	used Fig. 1 from Frank et al., 2006 (EPSL) and Google Earth	Mean Low Tide (MLT)	Not reported	-12.4	Not Reported	-10.9	1	-10.4	no elevation uncertainty quoted: assigned arbitrary ±1 m uncertainty; mlw/mlws elevation estimated using mean low tide level from Fig. 2 in Frank et al., 2006 (EPSL); reported elevation is relative to top of core. MSL estimated using MLLW estimate from IMCalc, Lorscheid and Rovere, 2019. Reported elevation is relative to top of core	Subsiding	-0.16	0.04	-0.16	0.04	Frank et al., 2006 (EPSL) used open-system ages calculated from the Thompson et al. 2003 EPSL model when determining uplift rates		coral and coralline algal framework	Yes
1271	1	Coral		Yes	Mass Spectrometer	Yes	Yes	Frank et al., 2006 Chutcharavan and Dutton, 2020		FR06-013	FR06-013-001	AM2-14.25E	2006-01-01	No	Single analysis; all MIS 5e corals from this study were considered altered because of their U and Th isotope systematics	No	Single analysis; calcite content >= 2 %; outside acceptable range for initial uranium isotopic composition (delta 234Ui = 145 +7/-5 per mil)	Chutcharavan and Dutton, 2020	Flexible protocol	No	Single analysis; calcite content >= 2 %; outside acceptable range for initial uranium isotopic composition (delta 234Ui = 145 +/- 5 per mil)	Chutcharavan and Dutton, 2020	Strict protocol	New Caledonia Island	Amedee Inlet	Amedee reef; core AM2	-22.4787	166.467	N/A	N/A	Yes	used Fig. 1 from Frank et al., 2006 (EPSL) and Google Earth	Mean Low Tide (MLT)	Not reported	-14.25	Not Reported	-12.75	1	-12.25	no elevation uncertainty quoted: assigned arbitrary ±1 m uncertainty; mlw/mlws elevation estimated using mean low tide level from Fig. 2 in Frank et al., 2006 (EPSL); reported elevation is relative to top of core. MSL estimated using MLLW estimate from IMCalc, Lorscheid and Rovere, 2019. Reported elevation is relative to top of core	Subsiding	-0.16	0.04	-0.16	0.04	Frank et al., 2006 (EPSL) used open-system ages calculated from the Thompson et al. 2003 EPSL model when determining uplift rates		coral and coralline algal framework	Yes
1272	1	Coral		Yes	Mass Spectrometer	Yes	Yes	Frank et al., 2006 Chutcharavan and Dutton, 2020		FR06-014	FR06-014-001	AM2-13.9F	2006-01-01	No	Single analysis; all MIS 5e corals from this study were considered altered because of their U and Th isotope systematics	No	Single analysis; calcite content >= 2 %	Chutcharavan and Dutton, 2020	Flexible protocol	No	Single analysis; calcite content >= 2 %	Chutcharavan and Dutton, 2020	Strict protocol	New Caledonia Island	Amedee Inlet	Amedee reef; core AM2	-22.4787	166.467	N/A	N/A	Yes	used Fig. 1 from Frank et al., 2006 (EPSL) and Google Earth	Mean Low Tide (MLT)	Not reported	-13.9	Not Reported	-12.4	1	-11.9	no elevation uncertainty quoted: assigned arbitrary ±1 m uncertainty; mlw/mlws elevation estimated using mean low tide level from Fig. 2 in Frank et al., 2006 (EPSL); reported elevation is relative to top of core. MSL estimated using MLLW estimate from IMCalc, Lorscheid and Rovere, 2019. Reported elevation is relative to top of core	Subsiding	-0.16	0.04	-0.16	0.04	Frank et al., 2006 (EPSL) used open-system ages calculated from the Thompson et al. 2003 EPSL model when determining uplift rates		coral and coralline algal framework	Yes
[truncated: 253 more rows]
[truncated: 68 more columns]

## Sheet: RSL proxies
WALIS RSL ID	Is this datapoint public?	Site	Subsite	Nation	Region	Main reference	Additional references	Latitude (decimal degrees)	Longitude (decimal degrees)	Horizontal Positioning Technique	Is this a marine/terrestrial limiting record?	Type of RSL Indicator	Indicator description	Upper limit of modern analog (m)	Lower limit of modern analog (m)	Quantification of indicative meaning	Sea level datum	Elevation measurement technique	Do you want to insert upper and lower elevation limits?	Upper elevation of indicator (m)	Lower elevation of indicator (m)	Upper/Lower elevation measurement error (1-sigma) (m)	RSL indicator elevation (m)	RSL indicator elevation error (m)	Notes on elevation and indicative range	Reference Water Level (m)	Indicative Range (m)	Paleo Relative Sea Level (m)	Paleo Relative Sea Level Uncertainty (m)	Is data on vertical land movements (independent from the sea level record) available?	Tectonic category	Comments on tectonic category	Published VLM rate (m/ky)	Published VLM rate uncertainty (m/ky)	Interpreted VLM rate (m/ky)	Interpreted VLM rate (m/ky) uncertainty	Comments on VLM rates	Age attribution	U-Series constraint	U-series age IDs	AAR constraint	Amino Acid Racemization age IDs	ESR constraint	Electro Spin Resonance age IDs	Luminescence constraint	Luminescence age IDs	Stratigraphic constraint	Stratigraphic context/age IDs	Other age constraint
[truncated: 15 more rows]
[truncated: 7 more columns]

[truncated: 7 more sheets: RSL indicators, Elevation measurement, Geographic positioning, Sea level datums, U-Series (corals), References, Field Descriptors]
